# Supplementary material for: Enhanced synthesis of oxo-verdazyl radicals bearing sterically-and electronically-diverse C3-substituents
Source: Royal Society of Chemistry journal article supplement (doi:10.1039/d1ob01946e), 2021-01-01
Supplement: d1ob01946e1.pdf [file d1ob01946e1.pdf]

Supporting Information

## Enhanced Synthesis of oxo-Verdazyl Radicals Bearing Sterically-and Electronically-Diverse C3-Substituents

Rebecca O. Fuller, <sup>\*a</sup> Madeleine R. Taylor,<sup>a</sup> Margot Duggin,<sup>a</sup> Alex C. Bissember,<sup>a</sup> Allan J. Canty,<sup>a</sup> Martyna M. Judd,<sup>b</sup> Nicholas Cox,<sup>b</sup> Stephen A. Moggach,<sup>c</sup> and Gemma F. Turner<sup>c</sup>

---

a School of Natural Sciences – Chemistry, University of Tasmania, Hobart, Tasmania, Australia  
E-mail: rebecca.fuller@utas.edu.au

b Research School of Chemistry, The Australia National University, Australian Capital Territory, Australia

c School of Molecular Sciences – Chemistry, The University of Western Australia, Crawley, Western Australia, Australia

### Supporting Information

#### Table of Contents

|      |                                                           |              |
|------|-----------------------------------------------------------|--------------|
| I.   | <b>X-ray Crystallography</b>                              | <b>S–2</b>   |
| II.  | <b>EPR Spectra and Thin Layer Chromatography Analysis</b> | <b>S–5</b>   |
| III. | <b>NMR Spectra</b>                                        | <b>S– 13</b> |
| IV.  | <b>Computational Details</b>                              | <b>S– 62</b> |

## I. X-ray Crystallography

**Table S1.** Single crystal X-ray crystallographic data for **1b**, **2b**, **7b**, **9b** and **9c**. All data are collected at  $T = 100$  K on a XtaLAB Synergy diffractometer using Cu  $K\alpha$  radiation.

|                                                                         | <b>1b</b>                                                     | <b>2b</b>                                                     | <b>7b</b>                                        | <b>9b</b>                                        | <b>9c</b>                                       |
|-------------------------------------------------------------------------|---------------------------------------------------------------|---------------------------------------------------------------|--------------------------------------------------|--------------------------------------------------|-------------------------------------------------|
| Chemical formula                                                        | C <sub>19</sub> H <sub>22</sub> N <sub>4</sub> O <sub>3</sub> | C <sub>19</sub> H <sub>22</sub> N <sub>4</sub> O <sub>3</sub> | C <sub>19</sub> H <sub>22</sub> N <sub>4</sub> O | C <sub>15</sub> H <sub>16</sub> N <sub>6</sub> O | C <sub>8</sub> H <sub>13</sub> N <sub>5</sub> O |
| $M_r$                                                                   | 354.40                                                        | 354.40                                                        | 322.40                                           | 296.34                                           | 207.24                                          |
| Crystal system, space group                                             | Triclinic, $P\bar{1}$                                         | Orthorhombic, $Pbca$                                          | Triclinic, $P\bar{1}$                            | Monoclinic, $P2_1/c$                             | Monoclinic, $C2/c$                              |
| Temperature (K)                                                         | 100                                                           | 100                                                           | 100                                              | 100                                              | 100                                             |
| $a, b, c$ (Å)                                                           | 8.5045 (3), 9.7970 (4),<br>11.9453 (5)                        | 10.9788 (1), 14.7369<br>(1), 22.0879 (2)                      | 7.5570 (2), 9.8051 (3),<br>12.9529 (3)           | 11.4529 (3), 10.4903<br>(3), 12.3136 (3)         | 19.7981 (3), 7.6021 (1),<br>16.1604 (3)         |
| $\alpha, \beta, \gamma$ (°)                                             | 108.084 (4), 100.023<br>(3), 101.754 (3)                      | 90, 90, 90                                                    | 103.486 (2), 91.205 (2),<br>111.252 (2)          | 90 98.940 (2), 90                                | 90, 124.601 (2), 90                             |
| $V$ (Å <sup>3</sup> )                                                   | 895.65 (7)                                                    | 3573.68 (5)                                                   | 863.92 (4)                                       | 1461.44 (7)                                      | 2002.05 (7)                                     |
| $Z$                                                                     | 2                                                             | 8                                                             | 2                                                | 4                                                | 8                                               |
| Radiation type                                                          | Cu $K\alpha$                                                  | Cu $K\alpha$                                                  | Cu $K\alpha$                                     | Cu $K\alpha$                                     | Cu $K\alpha$                                    |
| $\mu$ (mm <sup>-1</sup> )                                               | 0.74                                                          | 0.75                                                          | 0.63                                             | 0.74                                             | 0.79                                            |
| Crystal                                                                 | Clear, colourless block                                       | Clear, colourless block                                       | Clear, colourless plate                          | Clear, colourless block                          | Clear, colourless block                         |
| Crystal size (mm)                                                       | 0.16 × 0.09 × 0.06                                            | 0.19 × 0.16 × 0.13                                            | 0.12 × 0.06 × 0.04                               | 0.21 × 0.19 × 0.08                               | 0.19 × 0.17 × 0.11                              |
| Diffractometer                                                          | XtaLab Synergy S                                              | XtaLab Synergy S                                              | XtaLab Synergy S                                 | XtaLab Synergy S                                 | XtaLab Synergy S                                |
| Absorption correction                                                   | Multi-scan (CrysAlis Pro)                                     | Gaussian (CrysAlis Pro)                                       | Multi-scan (CrysAlis Pro)                        | Multi-scan (CrysAlis Pro)                        | Multi-scan (CrysAlis Pro)                       |
| $T_{\min}, T_{\max}$                                                    | 0.498, 1.000                                                  | 0.804, 1.000                                                  | 0.806, 1.000                                     | 0.538, 0.681                                     | 0.683, 1.000                                    |
| No. of measured, independent and observed reflections                   | 31657, 3558, 2984                                             | 31632, 3642, 3296                                             | 30689, 3408, 2965                                | 25448, 2957, 2593                                | 28970, 2042, 1937                               |
| $R_{\text{int}}$                                                        | 0.126                                                         | 0.042                                                         | 0.043                                            | 0.101                                            | 0.064                                           |
| $\theta_{\text{max}}$                                                   | 73.0                                                          | 75.6                                                          | 74.7                                             | 74.7                                             | 74.0                                            |
| $(\sin \theta/\lambda)_{\text{max}}$ (Å <sup>-1</sup> )                 | 0.628                                                         | 0.628                                                         | 0.627                                            | 0.630                                            | 0.628                                           |
| $R[F^2 > 2\sigma(F^2)], wR(F^2), S$                                     | 0.067, 0.201, 1.07                                            | 0.033, 0.085, 1.06                                            | 0.039, 0.097, 1.05                               | 0.065, 0.210, 1.12                               | 0.039, 0.105, 1.08                              |
| No. of reflections                                                      | 3558                                                          | 3642                                                          | 3408                                             | 2957                                             | 2042                                            |
| No. of parameters                                                       | 239                                                           | 0                                                             | 221                                              | 202                                              | 139                                             |
| No. of restraints                                                       | 0.067, 0.201, 1.07                                            | 0                                                             | 0                                                | 0                                                | 0                                               |
| H-atom treatment                                                        | H-atom parameters constrained                                 | H-atom parameters constrained                                 | H-atom parameters constrained                    | H-atom parameters constrained                    | H-atom parameters constrained                   |
| $\Delta\rho_{\text{max}}, \Delta\rho_{\text{min}}$ (e Å <sup>-3</sup> ) | 0.46, -0.48                                                   | 0.19, -0.21                                                   | 0.19, -0.18                                      | 0.41, -0.42                                      | 0.28, -0.28                                     |

Computer programs: *CrysAlis PRO* 1.171.41.104a (Rigaku OD, 2021), *SHELXT* 2018/2 (Sheldrick, 2018), *SHELXL* 2018/3 (Sheldrick, 2015), *Olex2* 1.5 (Dolomanov *et al.*, 2009).

**Table S2.** Single crystal X-ray crystallographic data for **11b**, **12b**, **12c** and **13c**. All data are collected at  $T = 100$  K on a XtaLAB Synergy diffractometer using Cu  $K\alpha$  radiation.

|                                                                         | <b>11b</b>                                                     | <b>12b</b>                                                     | <b>12c</b>                                                         | <b>13c</b>                                                     |
|-------------------------------------------------------------------------|----------------------------------------------------------------|----------------------------------------------------------------|--------------------------------------------------------------------|----------------------------------------------------------------|
| Chemical formula                                                        | C <sub>13</sub> H <sub>14</sub> N <sub>4</sub> OS <sub>2</sub> | C <sub>25</sub> H <sub>22</sub> N <sub>4</sub> OS <sub>2</sub> | C <sub>20</sub> H <sub>22</sub> N <sub>4</sub> OS·H <sub>2</sub> O | C <sub>8</sub> H <sub>11</sub> N <sub>5</sub> O <sub>3</sub> S |
| $M_r$                                                                   | 306.40                                                         | 458.58                                                         | 382.49                                                             | 257.28                                                         |
| Crystal system, space group                                             | Monoclinic, <i>C2/c</i>                                        | Monoclinic, <i>C2/c</i>                                        | Orthorhombic, <i>Pnma</i>                                          | Monoclinic, <i>P2<sub>1</sub>/c</i>                            |
| Temperature (K)                                                         | 100                                                            | 100                                                            | 100                                                                | 100                                                            |
| $a, b, c$ (Å)                                                           | 7.3232 (1), 19.6029 (2),<br>10.4905 (2)                        | 18.9089 (3), 11.6130 (2),<br>10.5619 (2)                       | 4.9308 (1), 19.1358 (5),<br>20.4329 (5)                            | 8.7388 (1), 8.7377 (1),<br>15.3935 (3)                         |
| $\alpha, \beta, \gamma$ (°)                                             | 90, 107.845 (2), 90                                            | 90, 90.812 (2), 90                                             | 90, 90, 90                                                         | 90, 105.809 (2), 90                                            |
| $V$ (Å <sup>3</sup> )                                                   | 1433.52 (4)                                                    | 2319.05 (7)                                                    | 1927.94 (8)                                                        | 1130.94 (3)                                                    |
| Z                                                                       | 4                                                              | 4                                                              | 4                                                                  | 4                                                              |
| Radiation type                                                          | Cu $K\alpha$                                                   | Cu $K\alpha$                                                   | Cu $K\alpha$                                                       | Cu $K\alpha$                                                   |
| $\mu$ (mm <sup>-1</sup> )                                               | 3.38                                                           | 2.28                                                           | 1.68                                                               | 2.64                                                           |
| Crystal                                                                 | Clear, colourless block                                        | Clear, colourless block                                        | Clear, colourless needle                                           | Clear, colourless block                                        |
| Crystal size (mm)                                                       | 0.26 × 0.12 × 0.09                                             | 0.35 × 0.24 × 0.18                                             | 0.29 × 0.05 × 0.03                                                 | 0.03 × 0.03 × 0.03                                             |
| Diffractometer                                                          | XtaLab Synergy S                                               | XtaLab Synergy S                                               | XtaLab Synergy S                                                   | XtaLab Synergy S                                               |
| Absorption correction                                                   | Multi-scan (CrysAlis Pro)                                      | Multi-scan (CrysAlis Pro)                                      | Multi-scan (CrysAlis Pro)                                          | Multi-scan (CrysAlis Pro)                                      |
| $T_{\min}, T_{\max}$                                                    | 0.644, 1.000                                                   | 0.797, 1.000                                                   | 0.850, 1.000                                                       | 0.950, 1.000                                                   |
| No. of measured,<br>independent and<br>observed reflections             | 21491, 1468, 1426                                              | 10618, 2302, 2154                                              | 13320, 1736, 1534                                                  | 20676, 2293, 2078                                              |
| $R_{\text{int}}$                                                        | 0.075                                                          | 0.030                                                          | 0.070                                                              | 0.053                                                          |
| $\theta_{\text{max}}$                                                   | 75.1                                                           | 74.9                                                           | 67.3                                                               | 73.1                                                           |
| $(\sin \theta/\lambda)_{\text{max}}$ (Å <sup>-1</sup> )                 | 0.628                                                          | 0.628                                                          | 0.598                                                              | 0.627                                                          |
| $R[F^2 > 2\sigma(F^2)], wR(F^2),$<br>S                                  | 0.032, 0.123, 1.14                                             | 0.033, 0.094, 1.06                                             | 0.136, 0.265, 1.28                                                 | 0.050, 0.134, 1.09                                             |
| No. of reflections                                                      | 1468                                                           | 2302                                                           | 1736                                                               | 2293                                                           |
| No. of parameters                                                       | 93                                                             | 146                                                            | 121                                                                | 156                                                            |
| No. of restraints                                                       | 0                                                              | 0                                                              | 30                                                                 | 0                                                              |
| H-atom treatment                                                        | H-atom parameters<br>constrained                               | H-atom parameters<br>constrained                               | H-atom parameters<br>constrained                                   | H-atom parameters<br>constrained                               |
| $\Delta\rho_{\text{max}}, \Delta\rho_{\text{min}}$ (e Å <sup>-3</sup> ) | 0.28, -0.39                                                    | 0.32, -0.26                                                    | 0.58, -0.40                                                        | 0.89, -0.80                                                    |

Computer programs: *CrysAlis PRO* 1.171.41.104a (Rigaku OD, 2021), *SHELXT* 2018/2 (Sheldrick, 2018), *SHELXL* 2018/3 (Sheldrick, 2015), *Olex2* 1.5 (Dolomanov *et al.*, 2009).

**Fig. S1:** Structural representations of **1b**, **2b**, **11b** and **12b**. Thermal ellipsoids are set to 30 % probability. Nitrogen (blue); oxygen (red), carbon (grey) For clarity, hydrogen atoms and lattice solvent are omitted. Displacement of the ring systems are highlighted when looking side on to the N1-C6-N5 plane (lower). Centroids have been used to measure the distance from the ring system to the N1-C6-N5 plane. **1b** 2.425 Å and 2.108 Å; **2b** 0.661 Å and 2.348 Å; **9b** 2.285 Å and 1.525 Å (Fig. 6); **11b** 1.322 Å and 1.322 Å; **12b** 1.487 Å and 1.844 Å. Values are given for the orientation shown below, with the above the plane distance is reported first.

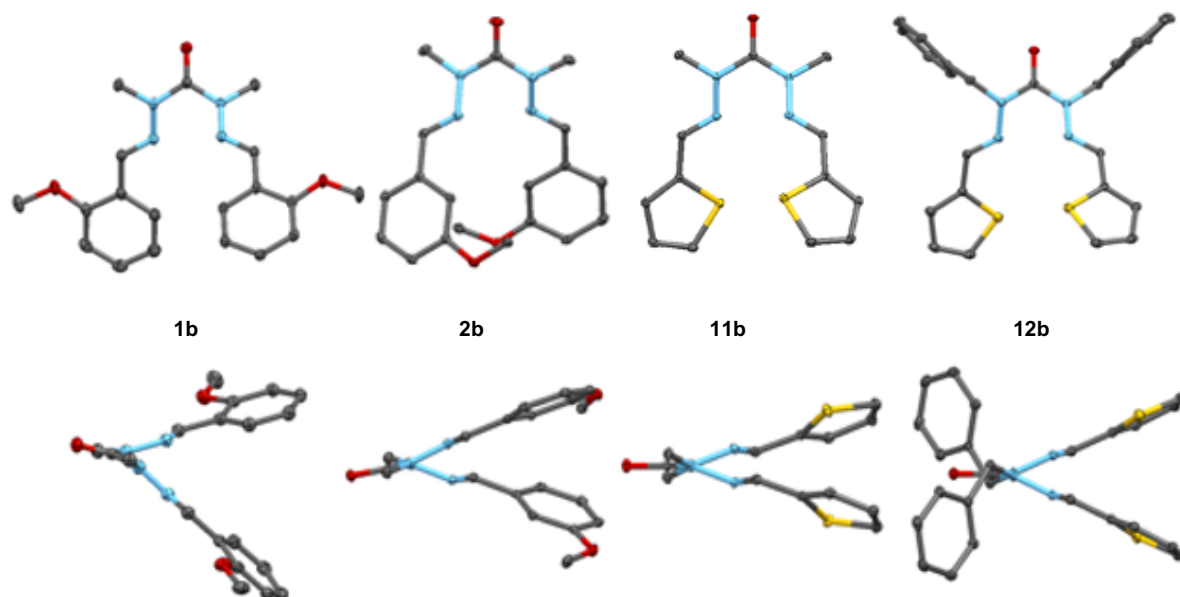

## II. EPR spectra

**Fig. S2:** The first derivative X-band (CW) EPR spectrum ( $\nu = 9.696$  GHz) of 1,5-dimethyl-3-(2-methoxyphenyl)-6-oxoverdazyl (**1d**) in degassed chloroform at 298 K (black trace) together with simulation (blue trace) using EasySpin garlic package in MATLAB. A field modulation of 2 G and power of 10 mW (18 dB attenuation) was used. The spectroscopic data matched previously reported [1]

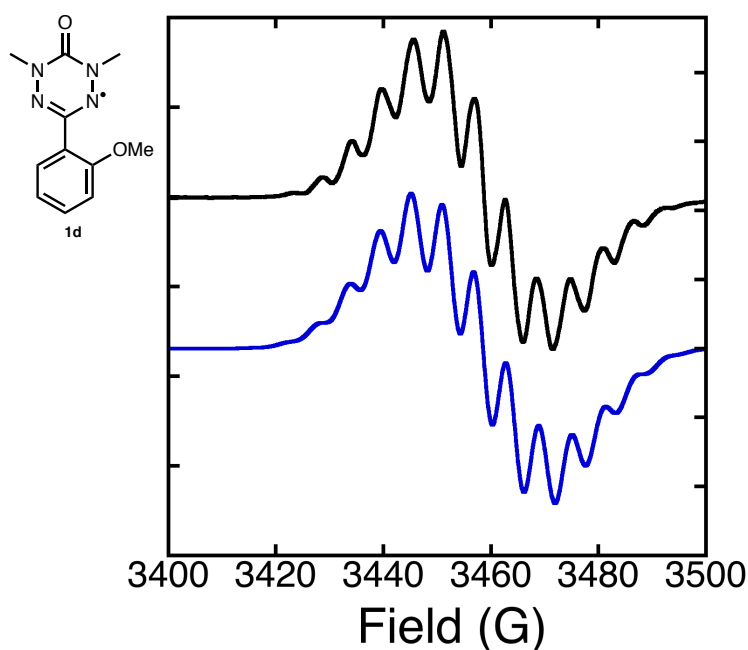

[1] F. A. Neugebauer, H. Fischer and R. Siegel *Chem. Ber.* 121 815-822 1988

**Fig. S3:** The first derivative X-band (CW) EPR spectrum ( $\nu = 9.691$  GHz) of 1,5-dimethyl-3-(3-methoxyphenyl)-6-oxoverdazyl (**2d**) in degassed chloroform at 298 K (black trace) together with simulation (blue trace) using EasySpin garlic package in MATLAB. A field modulation of 2 G and power of 10 mW (18 dB attenuation) was used.

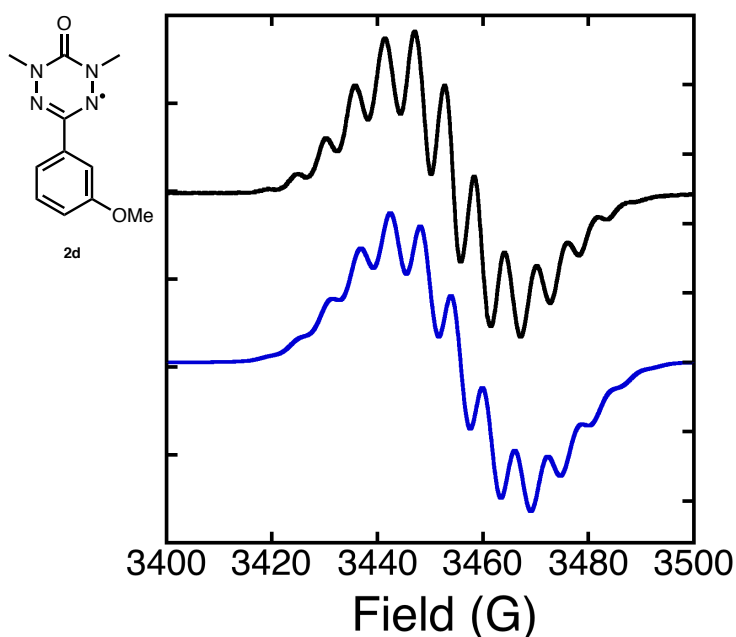

**Fig. S4:** The first derivative X-band (CW) EPR spectrum ( $\nu = 9.699$  GHz) of 1,5-dimethyl-3-(4-methoxyphenyl)-6-oxoverdazyl (**3d**) in degassed chloroform at 298 K (black trace) together with simulation (blue trace) using EasySpin garlic package in MATLAB. A field modulation of 2 G and power of 10 mW (12 dB attenuation) was used. Matched previously reported spectra [2].

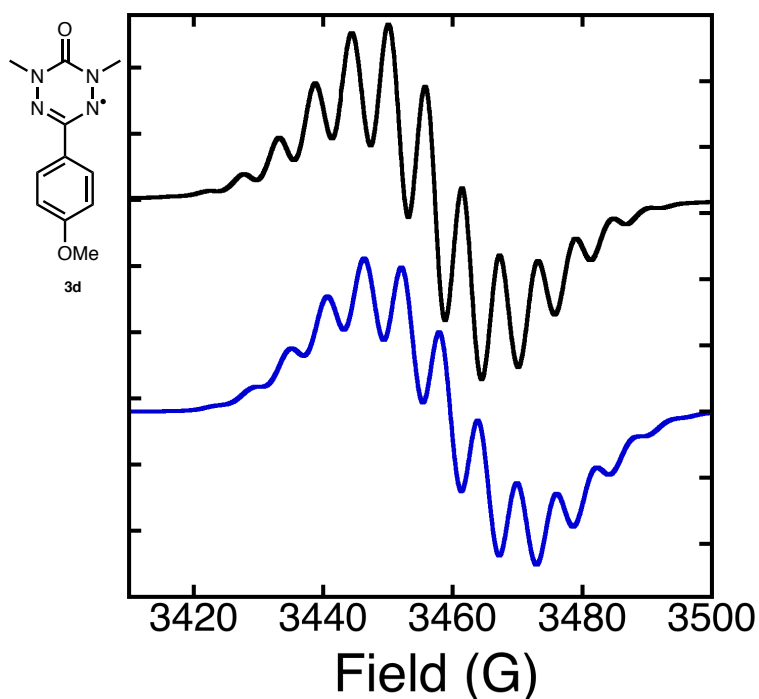

[2] F. A. Neugebauer, H. Fischer, R. Siegel and C. Krieger, *Chem. Ber.* **116**, 3461-3481 (1983);

**Fig. S5:** The first derivative X-band (CW) EPR spectrum ( $\nu = 9.688$  GHz) of 1,5-dimethyl-3-(2-trifluoromethylphenyl)-6-oxoverdazyl (**4d**) in degassed chloroform at 298 K (black trace) together with simulation (blue trace) using EasySpin garlic package in MATLAB. A field modulation of 2 G and power of 3 mW (18 dB attenuation) was used.

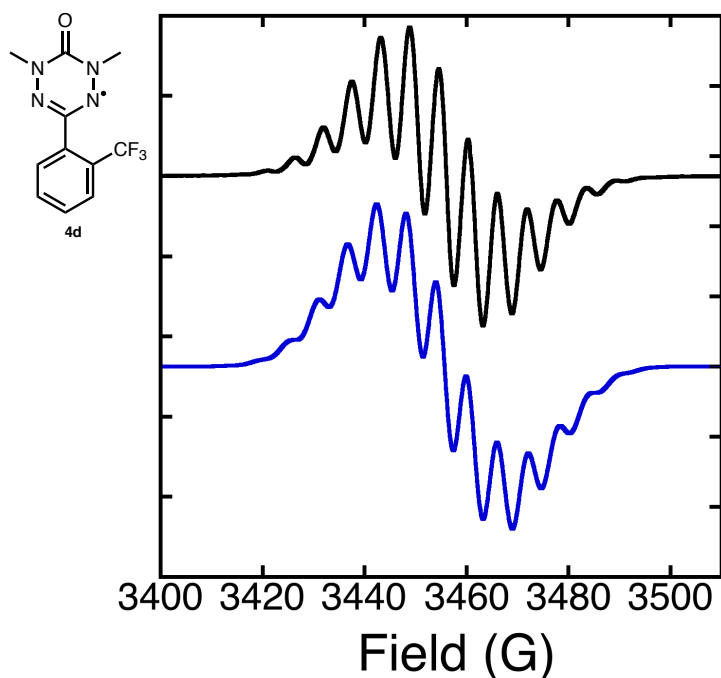

**Fig. S6:** The first derivative X-band (CW) EPR spectrum ( $\nu = 9.682$  GHz) of 1,5-dimethyl-3-(3-trifluoromethylphenyl)-6-oxoverdazyl (**5d**) in degassed chloroform at 298 K (black trace) together with simulation (blue trace) using EasySpin garlic package in MATLAB. A field modulation of 2 G and power of 6 mW (12 dB attenuation) was used.

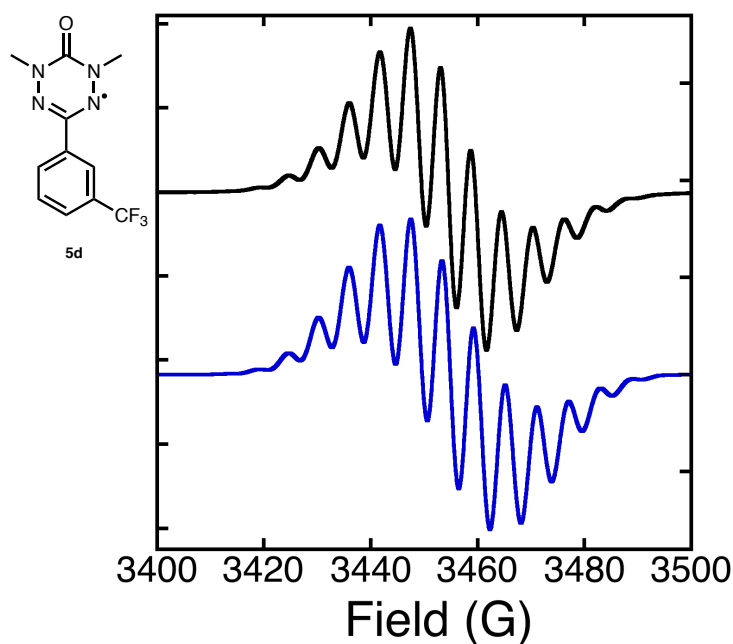

**Fig. S7:** The first derivative X-band (CW) EPR spectrum ( $\nu = 9.695$  GHz) of 1,5-dimethyl-3-(4-trifluoromethylphenyl)-6-oxoverdazyl (**6d**) in degassed chloroform at 298 K (black trace) together with simulation (blue trace) using EasySpin garlic package in MATLAB. A field modulation of 2 G and power of 6 mW (12 dB attenuation) was used.

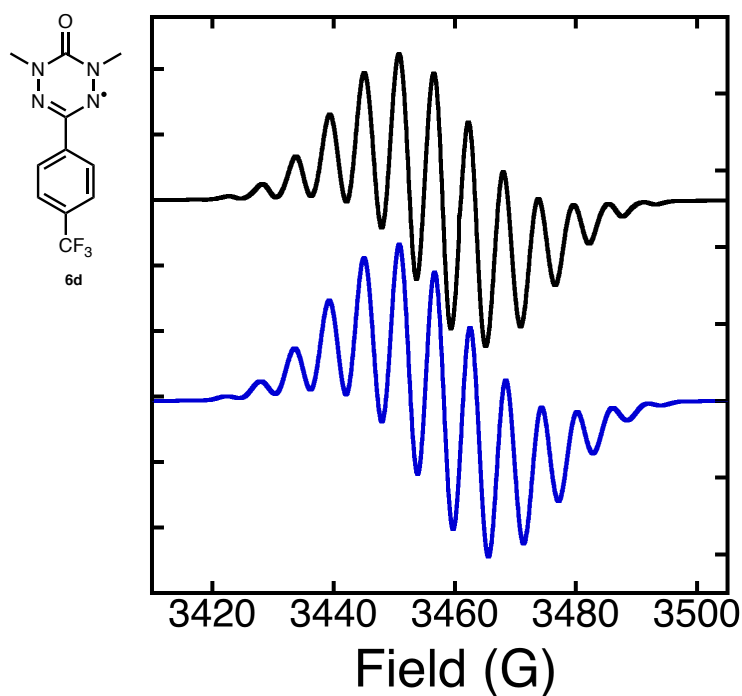

**Fig. S8:** The first derivative X-band (CW) EPR spectrum ( $\nu = 9.687$  GHz) of 1,5-dimethyl-3-(2-methylphenyl)-6-oxoverdazyl (**7d**) in degassed chloroform at 298 K (blue trace) together with simulation (black trace) using EasySpin garlic package in MATLAB. A field modulation of 2 G and power of 10 mW (18 dB attenuation) was used. Matched previously reported spectra [2].

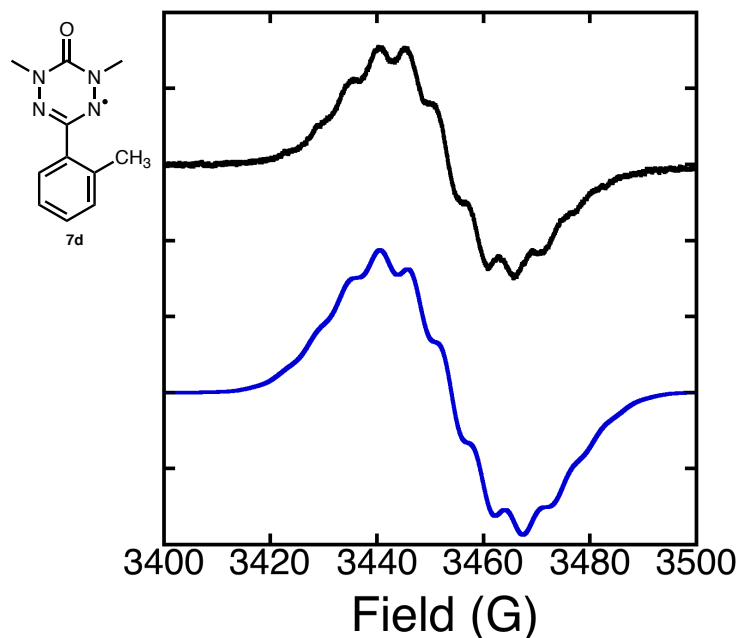

**Fig. S9:** The first derivative X-band (CW) EPR spectrum ( $\nu = 9.669$  GHz) of 1,5-dimethyl-3-(2-nitrobenzyl)-6-oxoverdazyl (**8d**) in degassed chloroform at 298 K (black trace) together with simulation (blue trace) using EasySpin garlic package in MATLAB. A field modulation of 2 G and power of 8 mW (18 dB attenuation) was used.

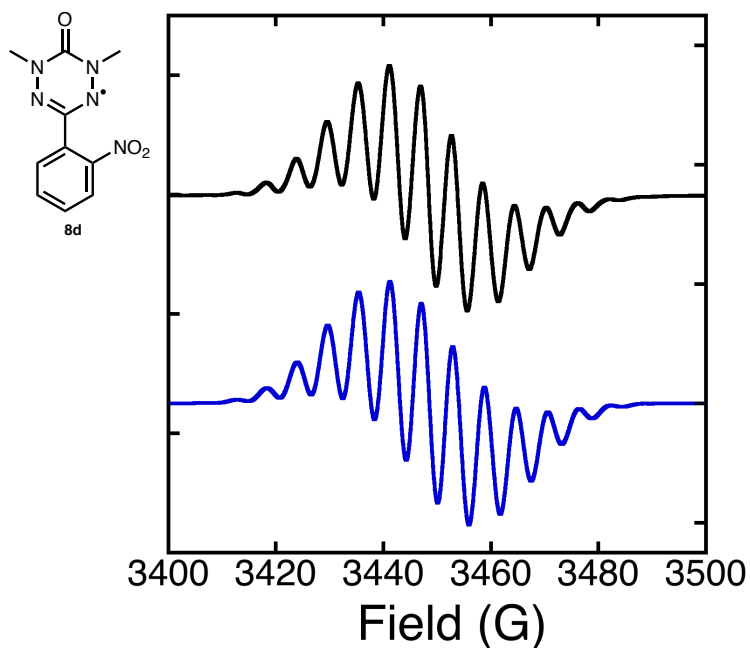



**Fig. S10:** The first derivative X-band (CW) EPR spectrum ( $\nu = 9.693$  GHz) of 1,5-dimethyl-3-(2-pyridine)-6-oxoverdazyl (**9d**) in degassed chloroform at 298 K (black trace) together with simulation (blue trace) using EasySpin garlic package in MATLAB. A field modulation of 2 G and power of 6 mW (12 dB attenuation) was used. The spectroscopic data matched previously reported [3].

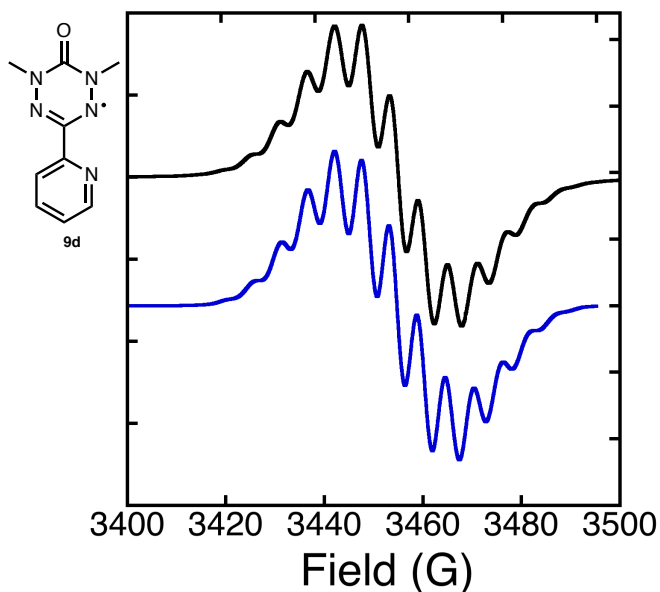

[3] C. L. Barr., P. A. Chase, R. G. Hicks, M. T. Lemaire and C. L. Stevens, *J. Org. Chem.*, **1999**, *64*, 8893-8897.

**Fig. S11:** The first derivative X-band (CW) EPR spectrum ( $\nu = 9.691$  GHz) of 1,5-dimethyl-3-(2-methoxy-4-trifluoromethylphenyl)-6-oxoverdazyl (**10d**) in degassed chloroform at 298 K (black trace) together with simulation (blue trace) using EasySpin garlic package in MATLAB. A field modulation of 2 G and power of 10 mW (18 dB attenuation) was used.

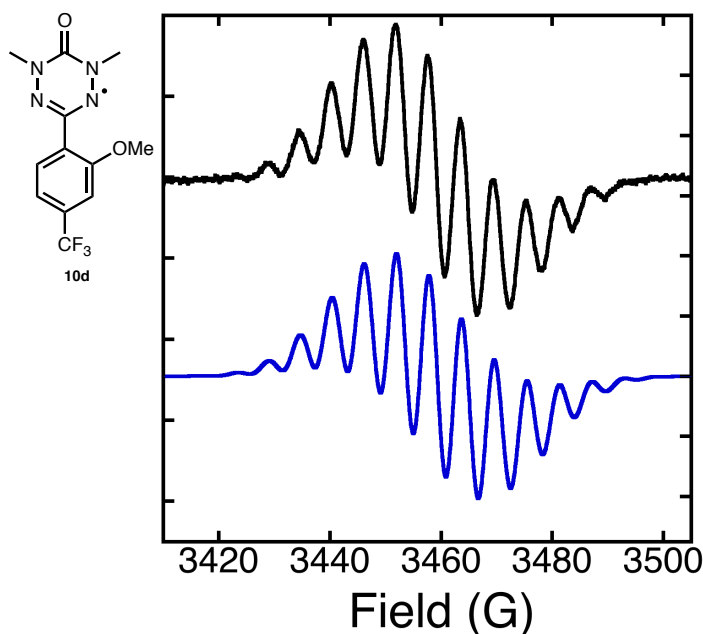

**Fig. S12:** The first derivative X-band (CW) EPR spectrum ( $\nu = 9.686$  GHz) of 1,5-dimethyl-3-(2-thiophene)-6-oxoverdazyl (**11d**) in degassed chloroform at 298 K (black trace) together with simulation (blue trace) using EasySpin garlic package in MATLAB. A field modulation of 2 G and power of 6 mW (12 dB attenuation) was used.

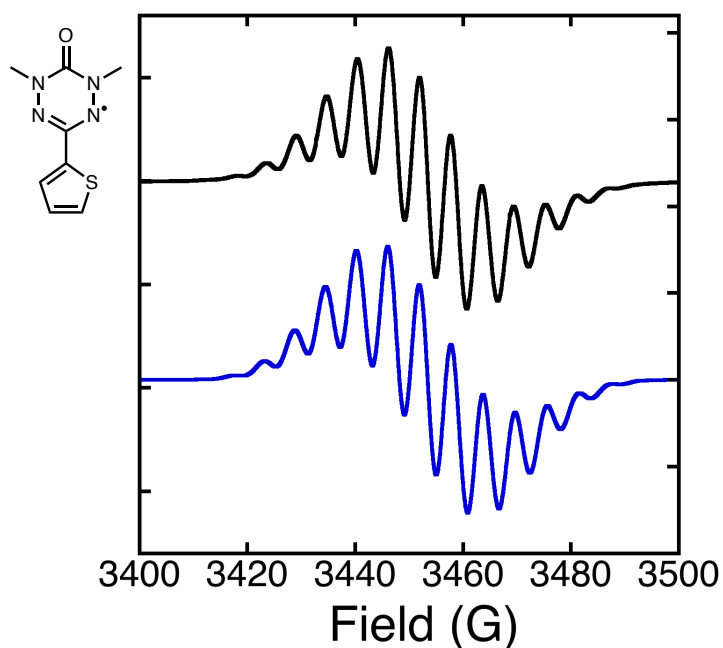

**Table S3.** Linewidths ( $lw$ ) and  $g$ -value ( $g$ ) for the EPR simulations shown in Fig. S2-S12. Spectra were recorded with a modulation amplitude of 2 G. Simulations used hyperfine coupling constants  $a(N_{2,4}) = 6.5$  G (18.2 MHz);  $a(N_{1,5}) = 5.3$  G (14.9 MHz);  $a(H_{CH}) = 5.3$  G (14.9 MHz) from the hyperfine coupling of the unpaired electron with four nitrogen atoms of the verdazyl ring ( $^{14}N$ ,  $I=1$  abundance 99.6 %) with six hydrogen atoms ( $^1H$ ,  $I=1/2$ , Natural abundance=99.98 %) on the methyl groups.

| Entry      | $g$    | $lw$ (G) | $\nu$ (GHz) |
|------------|--------|----------|-------------|
| <b>1d</b>  | 2.0023 | 0.51     | 9.696       |
| <b>2d</b>  | 2.0036 | 0.52     | 9.691       |
| <b>3d</b>  | 2.0044 | 0.46     | 9.699       |
| <b>4d</b>  | 2.0028 | 0.43     | 9.688       |
| <b>5d</b>  | 2.0022 | 0.43     | 9.682       |
| <b>6d</b>  | 2.0031 | 0.38     | 9.695       |
| <b>7d</b>  | 2.0038 | 0.52     | 9.687       |
| <b>8d</b>  | 2.0032 | 0.40     | 9.669       |
| <b>9d</b>  | 2.0043 | 0.49     | 9.693       |
| <b>10d</b> | 2.0021 | 0.40     | 9.694       |
| <b>11d</b> | 2.0037 | 0.44     | 9.686       |

**Fig. S13:** The first derivative X-band (CW) EPR spectrum ( $\nu = 9.686$  GHz) of 1,5-dimethyl-3-(2-methoxyphenyl)-6-oxoverdazyl (**9d**) in degassed chloroform at 298 K (black trace) together with simulation (blue trace) using EasySpin garlic package in MATLAB. A field modulation of 0.1 G was used.

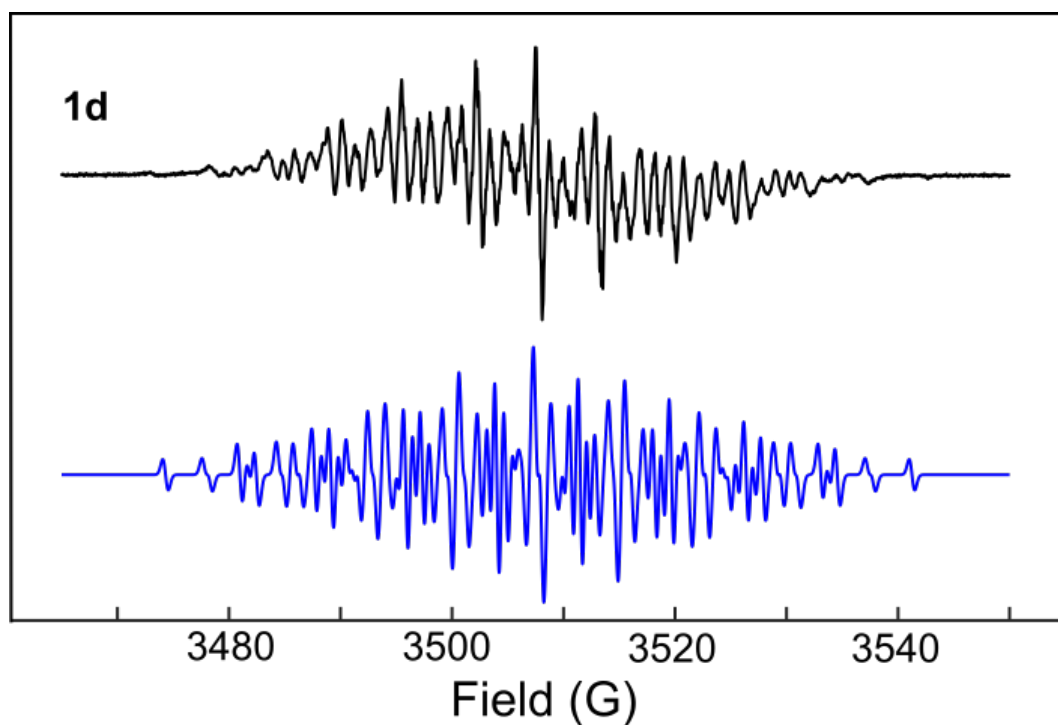

**Fig. S14:** The first derivative X-band (CW) EPR spectrum ( $\nu = 9.686$  GHz) of 1,5-dimethyl-3-(2-pyridine)-6-oxoverdazyl (**9d**) in degassed chloroform at 298 K (black trace) together with simulation (blue trace) using EasySpin garlic package in MATLAB. A field modulation of 0.1 G was used.

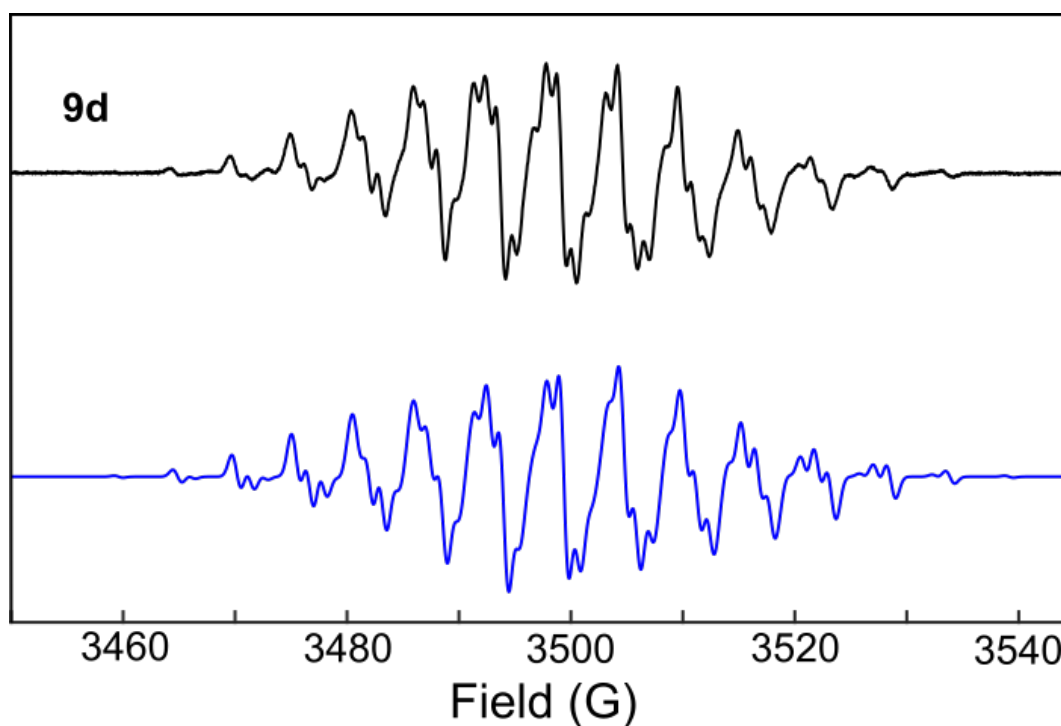

**Table S4.** Hyperfine (a) and linewidth (lw) fitting parameters for EPR simulations of spectra of **1d**, **9d** and **11d**, which were measured degassed with N<sub>2</sub> in chloroform, and recorded with a modulation amplitude of 0.1 G to resolve the narrow features of the hyperfine. (lower) table is reproduced with hyperfine values given in SI units.

|            | Hyperfine (G)        |                      |                     |                     |                     | <i>lw</i> (G) |
|------------|----------------------|----------------------|---------------------|---------------------|---------------------|---------------|
|            | a(N <sub>2,4</sub> ) | a(N <sub>1,5</sub> ) | a(H <sub>CH</sub> ) | a(H <sub>CH</sub> ) | a(H <sub>CH</sub> ) |               |
| <b>1d</b>  | 6.6                  | 5.3                  | 3.0                 | -                   | -                   | 0.6           |
| <b>9d</b>  | 6.5                  | 5.6                  | 5.2                 |                     |                     | 0.8           |
| <b>11d</b> | 6.5                  | 5.3                  | 5.3                 | 5.1                 | 5.0                 | 0.2           |

|            | Hyperfine (MHz)      |                      |                     |                     |                     | <i>lw</i> (G) |
|------------|----------------------|----------------------|---------------------|---------------------|---------------------|---------------|
|            | a(N <sub>2,4</sub> ) | a(N <sub>1,5</sub> ) | a(H <sub>CH</sub> ) | a(H <sub>CH</sub> ) | a(H <sub>CH</sub> ) |               |
| <b>1d</b>  | 18.6                 | 14.8                 | 8.4                 | -                   | -                   | 0.6           |
| <b>9d</b>  | 18.2                 | 15.7                 | 14.6                |                     |                     | 0.8           |
| <b>11d</b> | 18.2                 | 14.8                 | 14.9                | 14.3                | 14.0                | 0.2           |

**Table S5.** Thin layer Chromatography R<sub>f</sub> analysis of the verdazyl and leucoverdazyl compounds. The eluent used in most cases is 100% EtOAc. One exception is compound **9d**, the radical did not elute in 100 % EtOAc, and 1% MeOH in EtOAc was used instead.

|            | R <sub>f</sub> |                  | R <sub>f</sub> |
|------------|----------------|------------------|----------------|
| <b>1d</b>  | 0.85           | <b>leuco-1d</b>  | 0.79           |
| <b>2d</b>  | 0.82           | <b>leuco-2d</b>  | 0.66           |
| <b>3d</b>  | 0.79           | <b>leuco-3d</b>  | 0.68           |
| <b>4d</b>  | 0.86           | <b>leuco-4d</b>  | 0.70           |
| <b>5d</b>  | 0.86           | <b>leuco-5d</b>  | 0.77           |
| <b>6d</b>  | 0.86           | <b>leuco-6d</b>  | 0.78           |
| <b>7d</b>  | 0.83           | <b>leuco-7d</b>  | 0.68           |
| <b>8d</b>  | 0.86           | <b>leuco-8d</b>  | 0.76           |
| <b>9d</b>  | 0.73           | <b>leuco-9d</b>  | 0.63           |
| <b>10d</b> | 0.83           | <b>leuco-10d</b> | 0.70           |
| <b>11d</b> | 0.85           | <b>leuco-11d</b> | 0.79           |

## III. NMR spectra

Fig. S15:  $^1\text{H}$  NMR of **1a**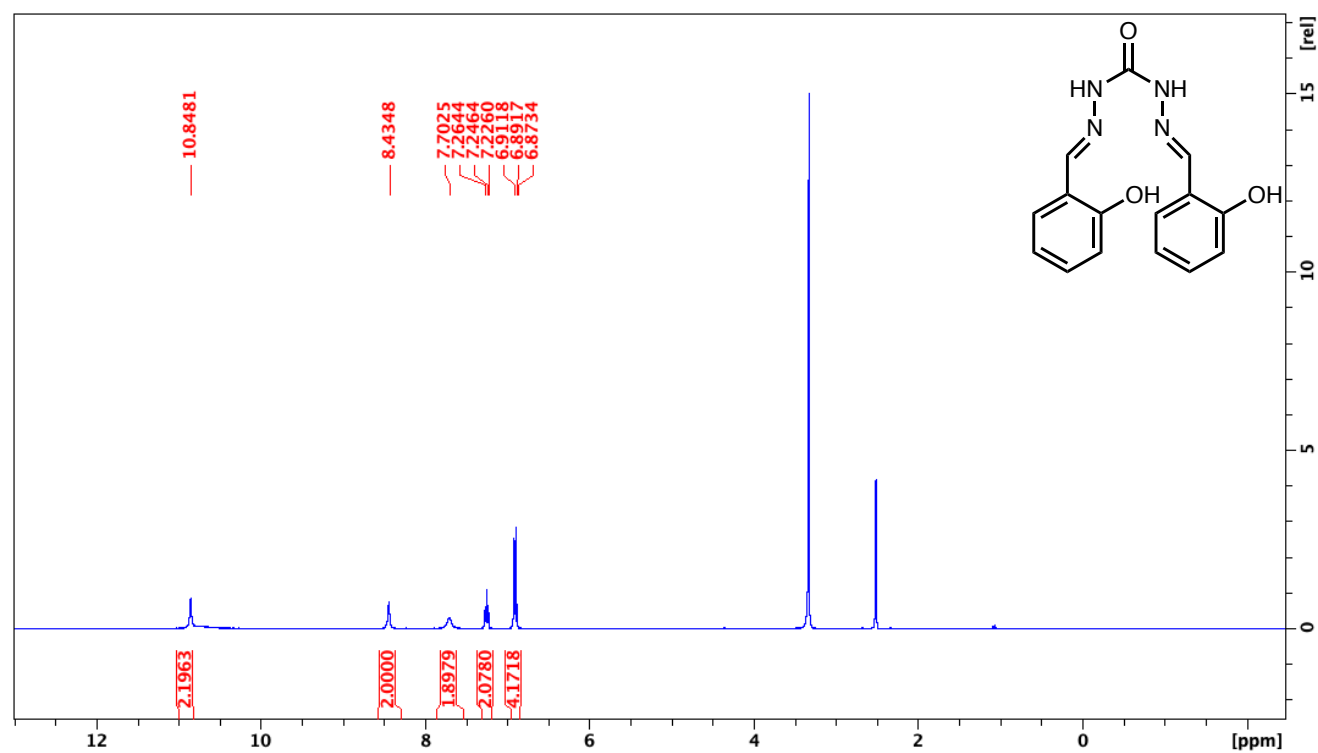Fig. S16:  $^{13}\text{C}$  NMR of **1a**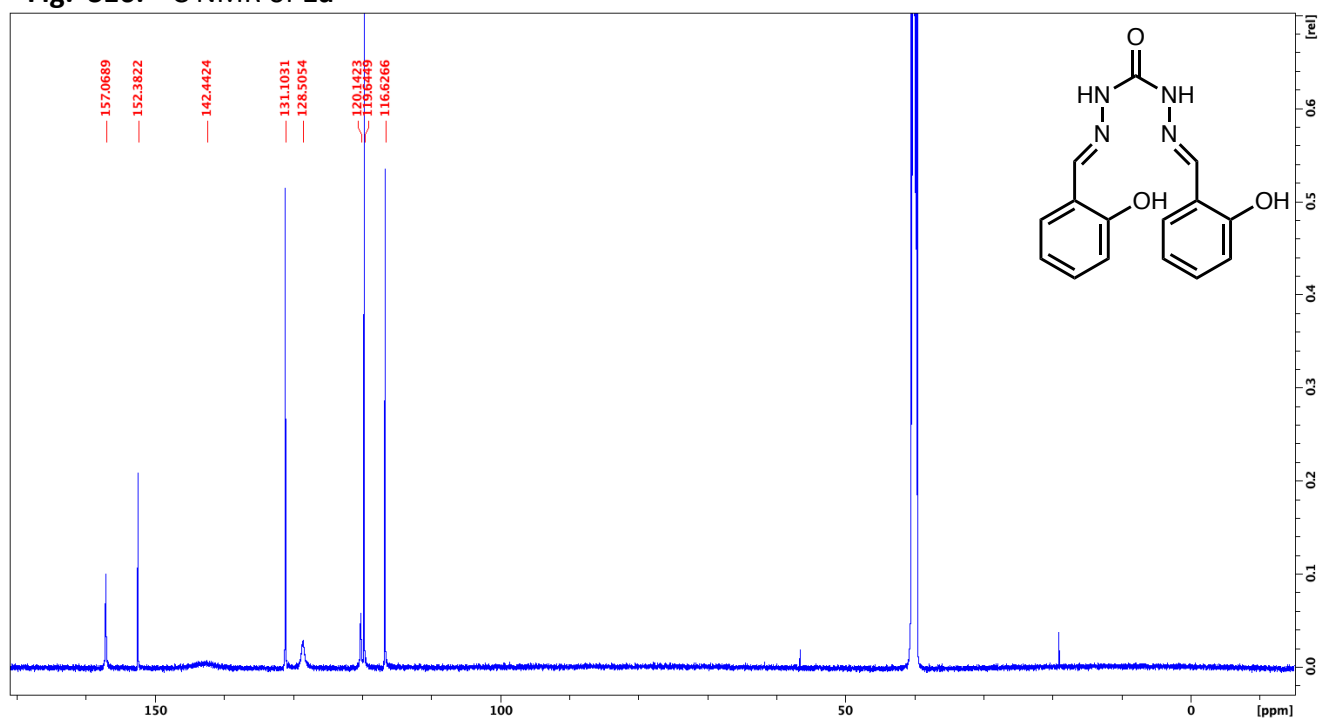

Fig. S17:  $^1\text{H}$  NMR of **1b**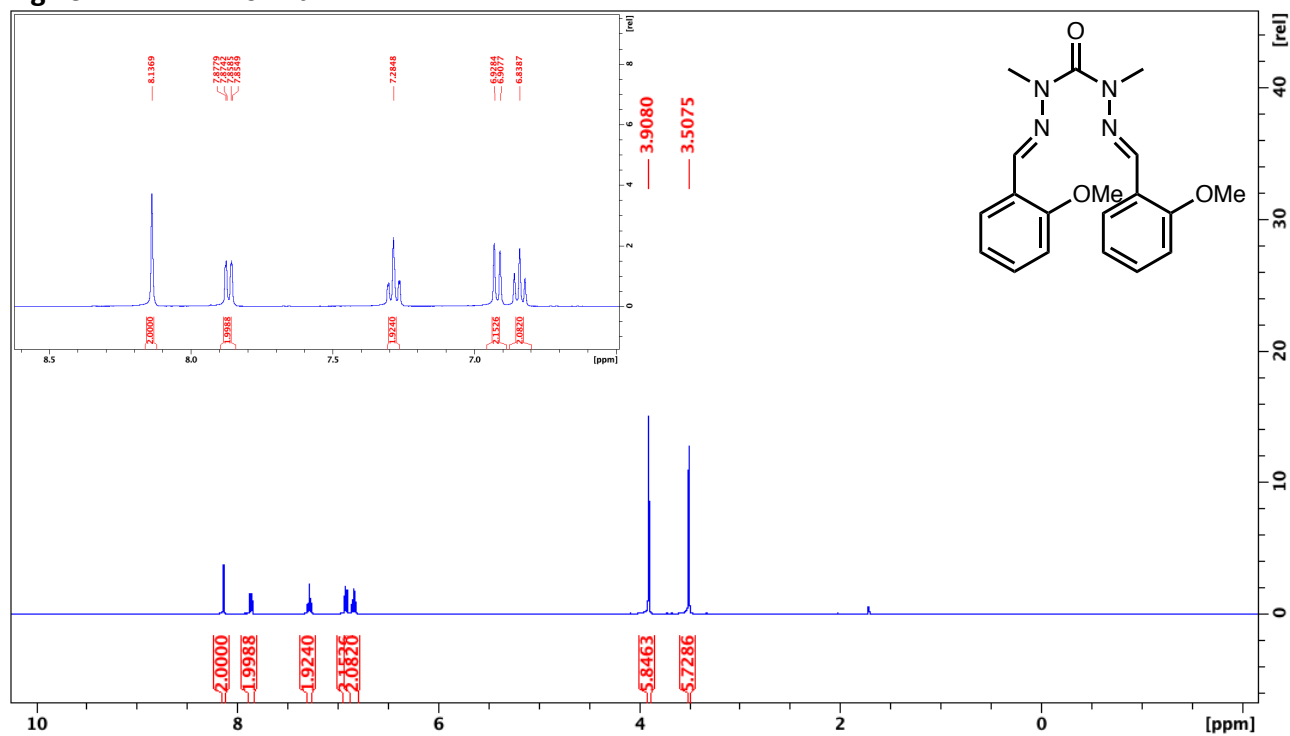Fig. S18:  $^{13}\text{C}$  NMR of **1b**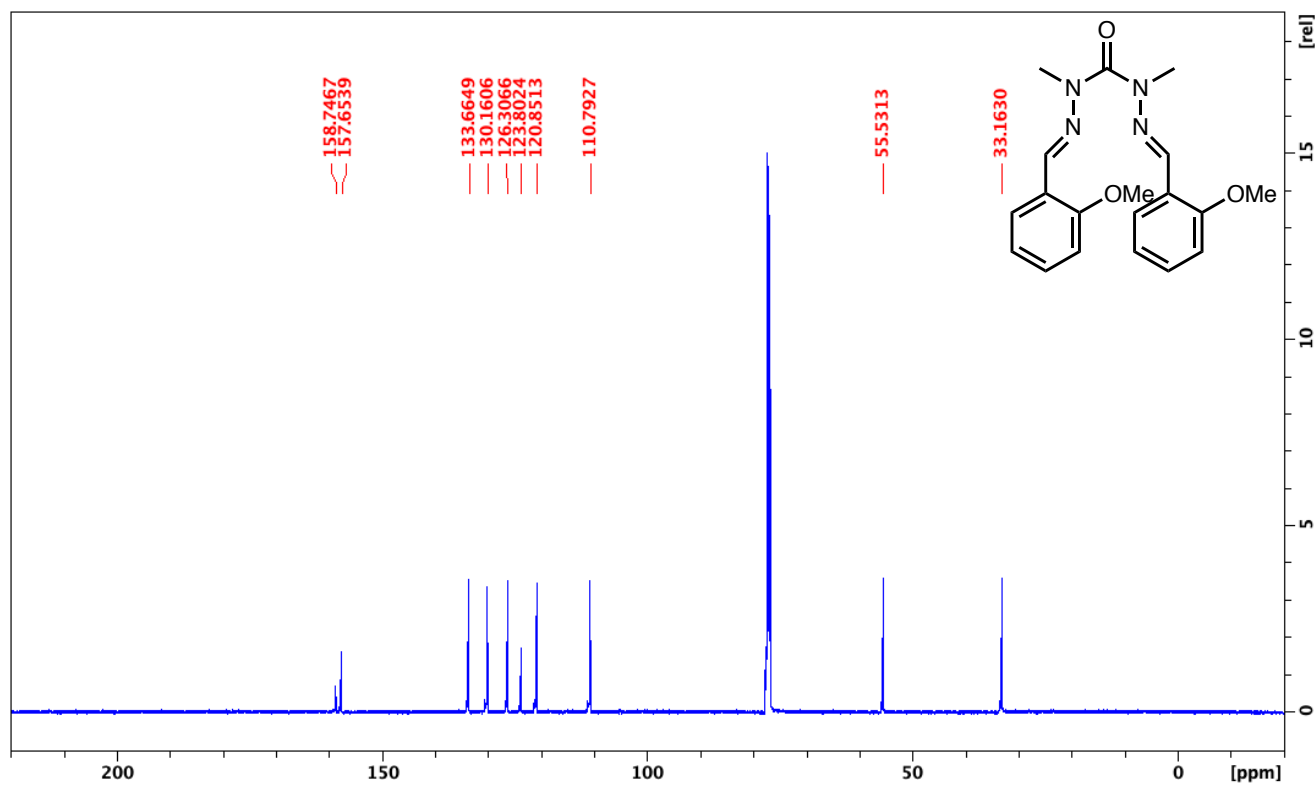

**Fig. S19:**  $^1\text{H}$  NMR **1b** (crude) - used directly in ring closure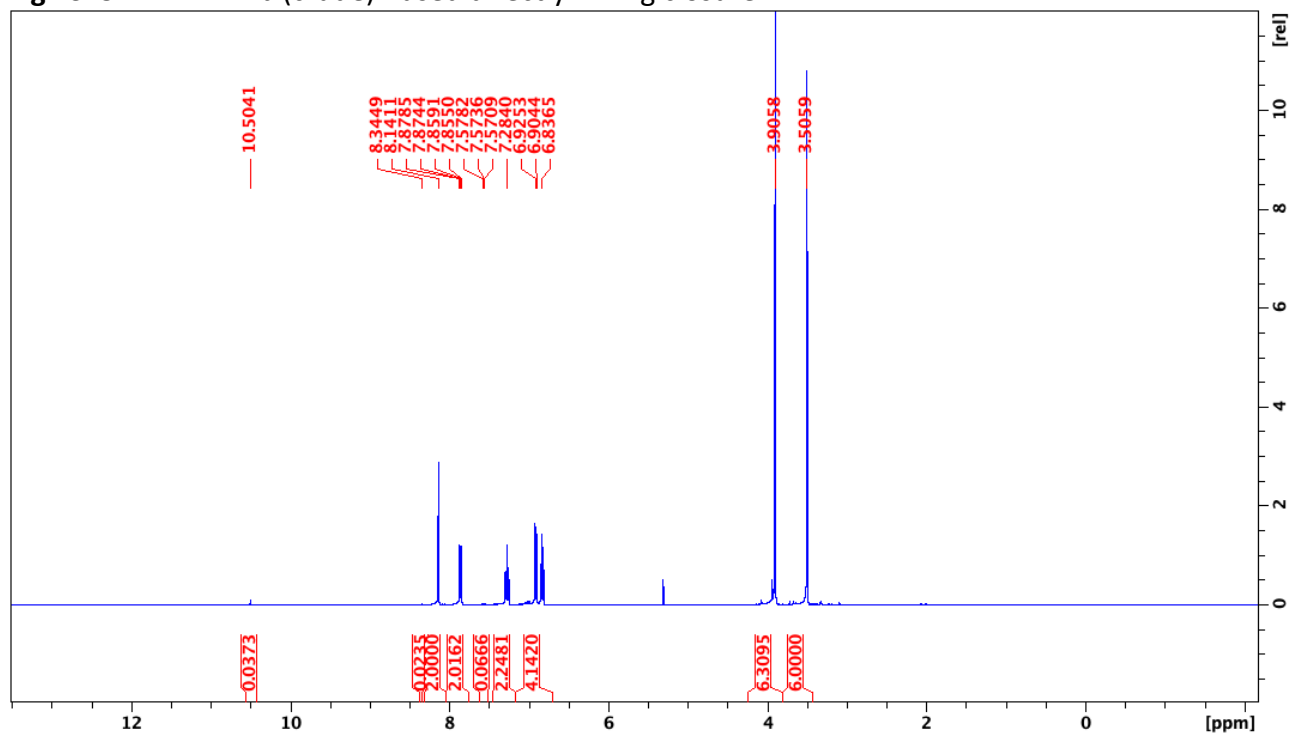

The crude **1b** contains a small amount of the monomethylated product and can be used directly in the synthesis of **1c** with little impact on the yield.

**Fig. S20:**  $^1\text{H}$  NMR **1b** (Hydrolysis of imine-air)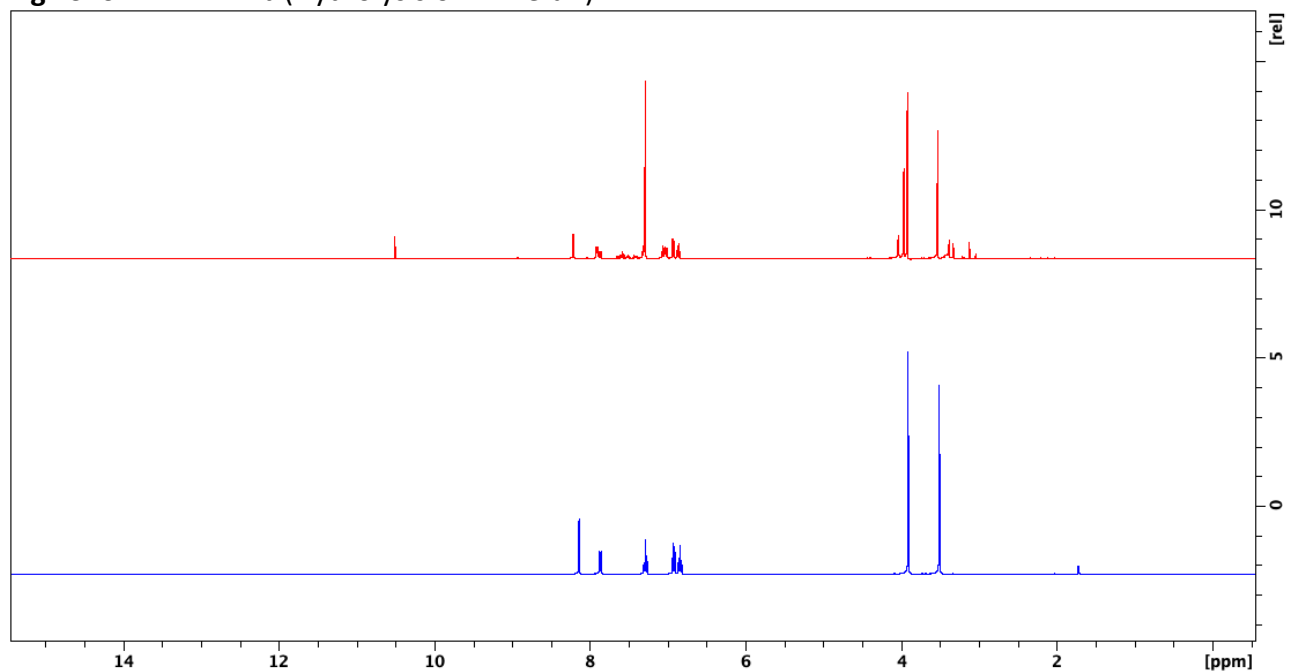

Spectrum of **1b** crystals (lower trace) on the day of collection; (upper trace) crystals two months later after storage in air.

**Fig. S21:**  $^1\text{H}$  NMR **1b** (Hydrolysis of imine-solvent)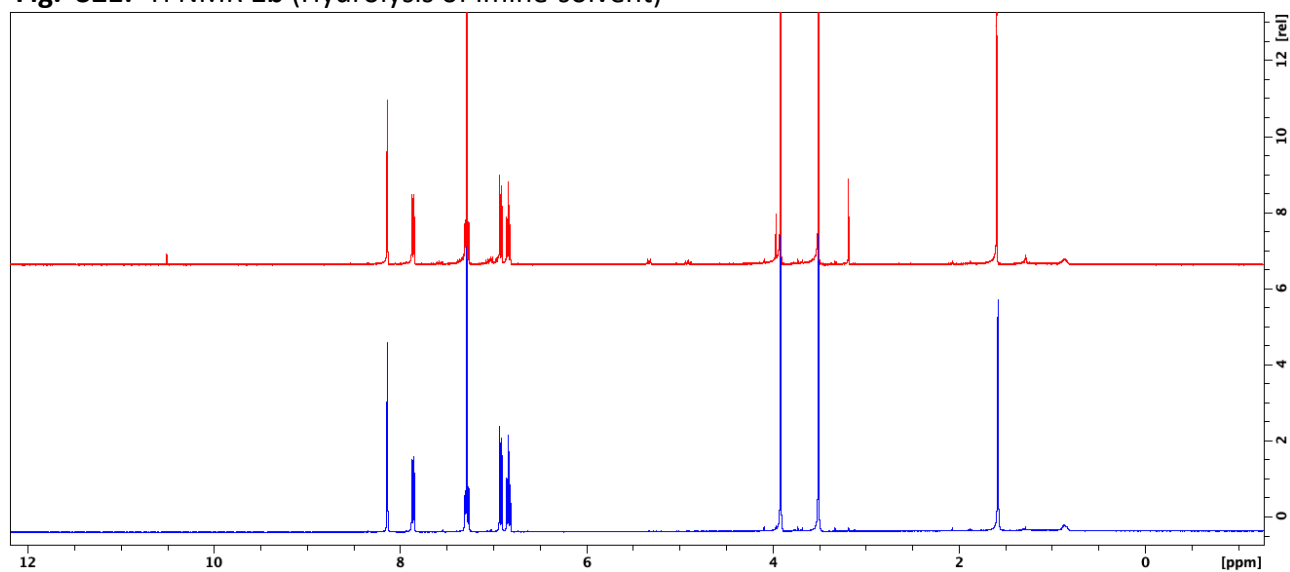

Spectrum of in wet  $\text{CDCl}_3$  **1b** (lower trace) and remeasured after 3 days **1b** (lower trace) ;

**Fig. S22:**  $^1\text{H}$  NMR of **1c**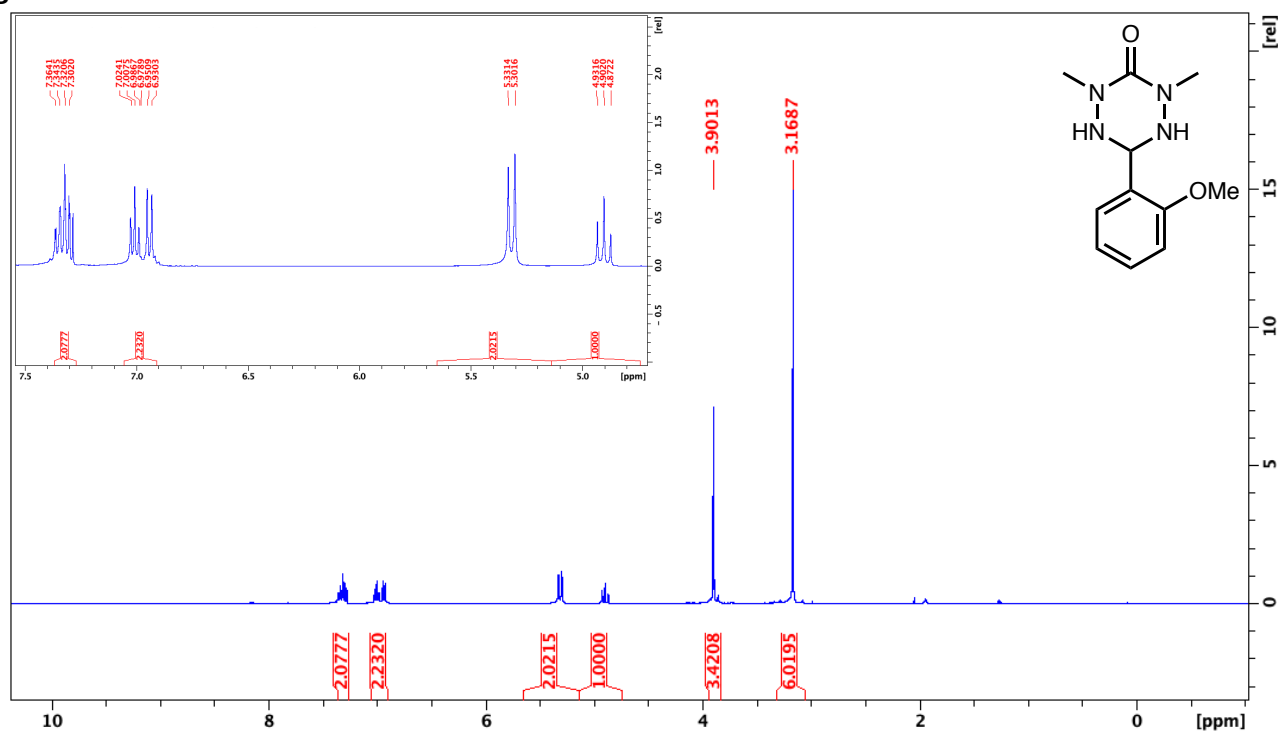



Fig. S23:  $^{13}\text{C}$  NMR of **1c**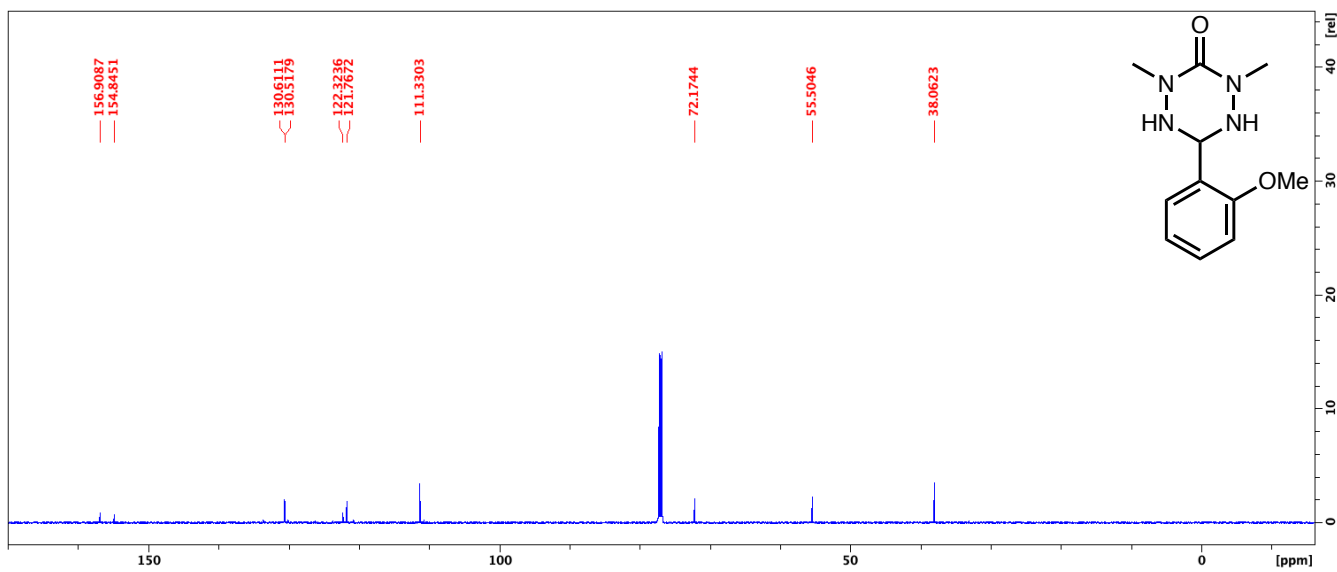Fig. S24:  $^1\text{H}$  NMR of **2a**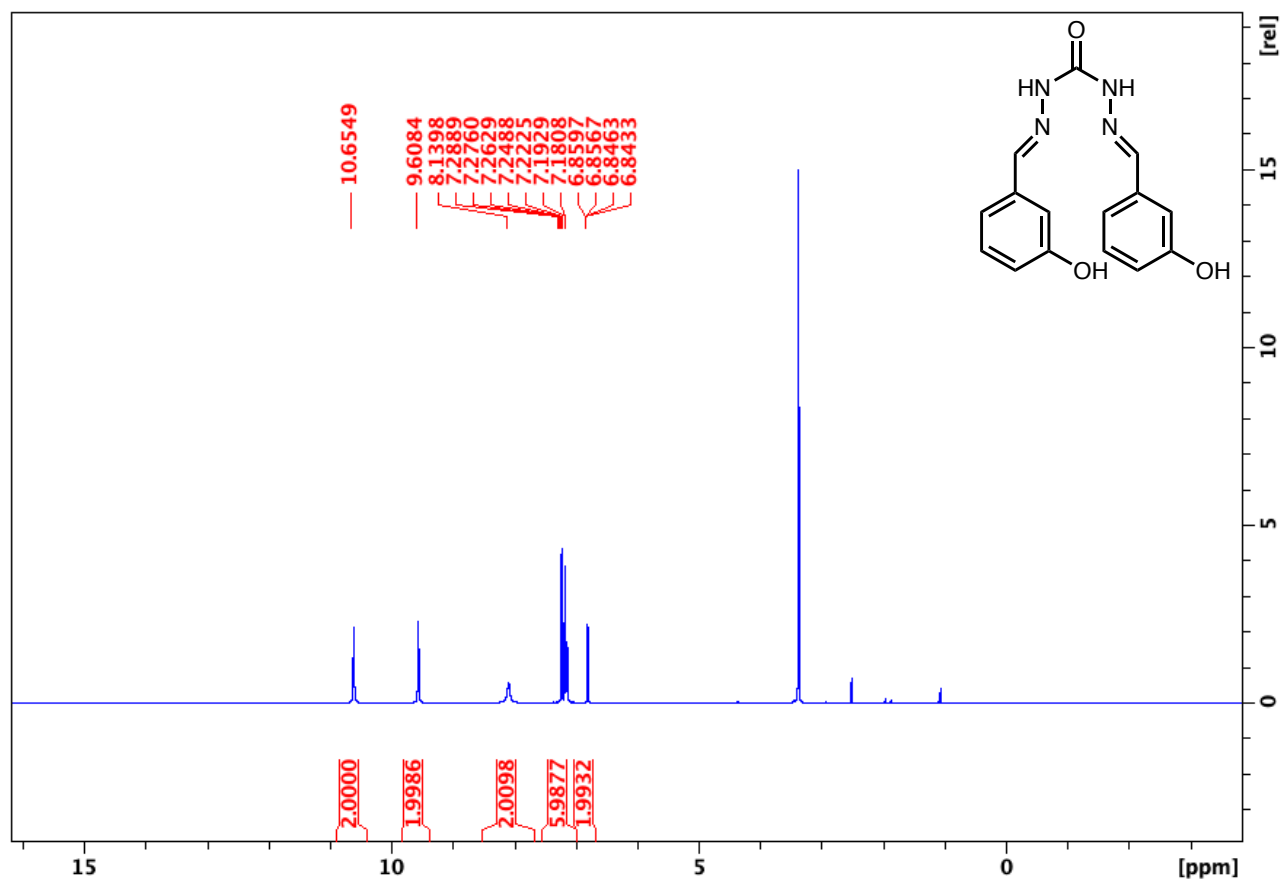

Fig. S25:  $^{13}\text{C}$  NMR of 2a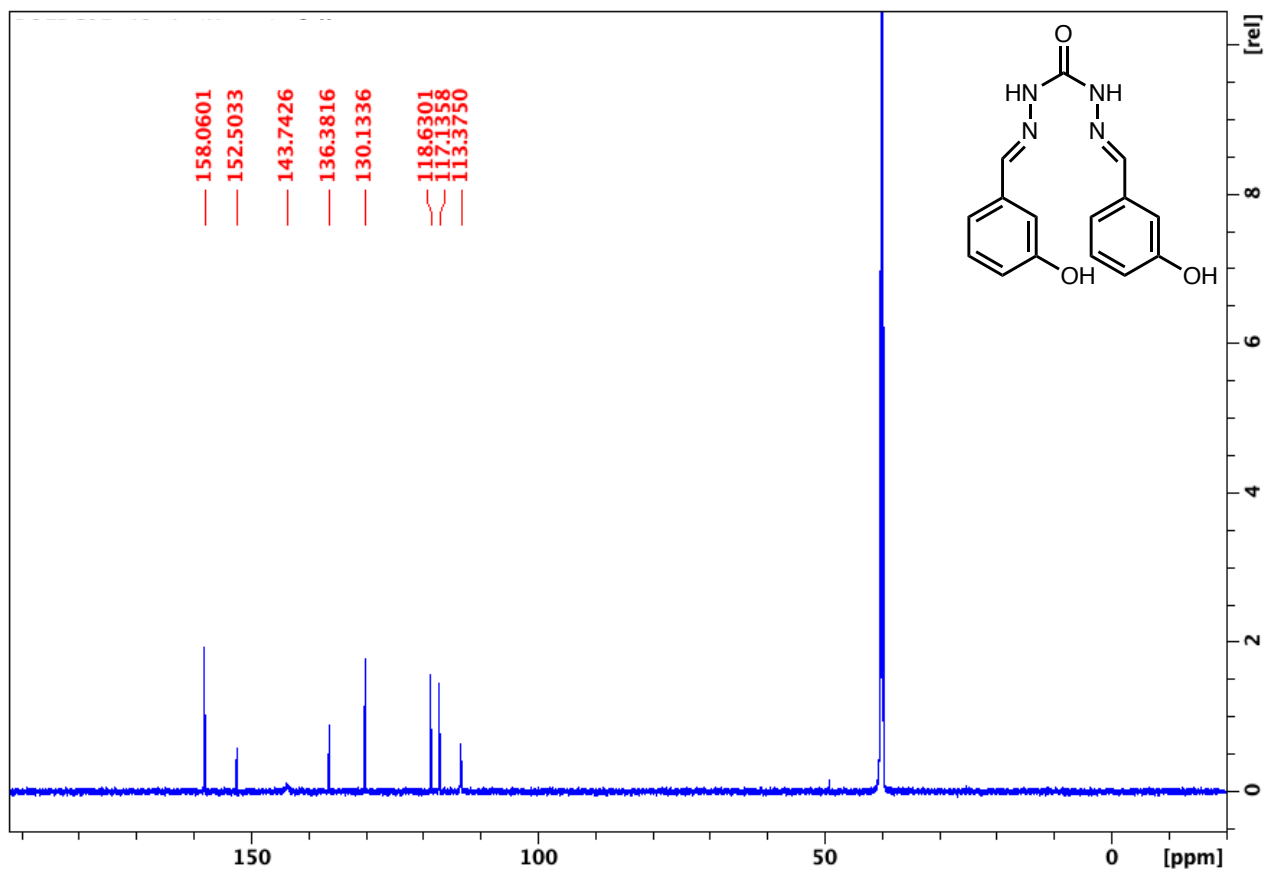Fig. S26:  $^1\text{H}$  NMR of 2b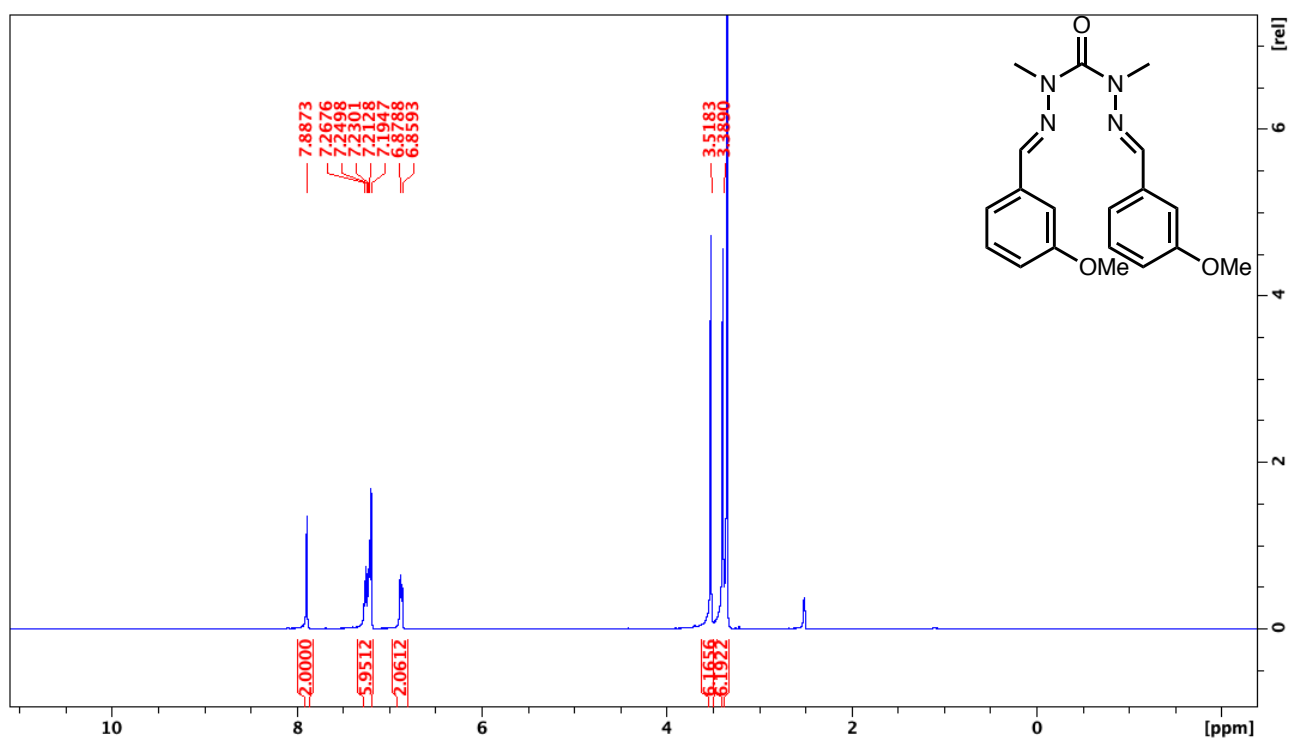

Fig. S27:  $^{13}\text{C}$  NMR of **2b**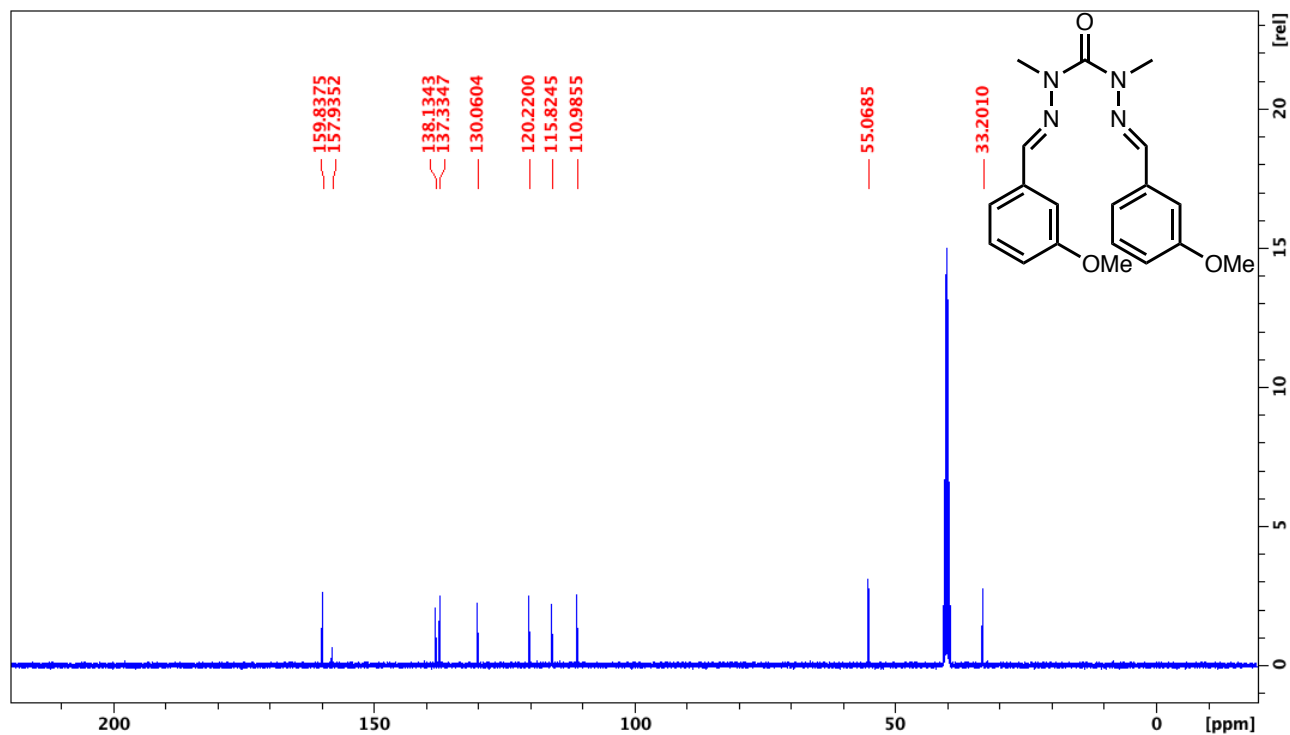Fig. S28:  $^1\text{H}$  NMR of **2c**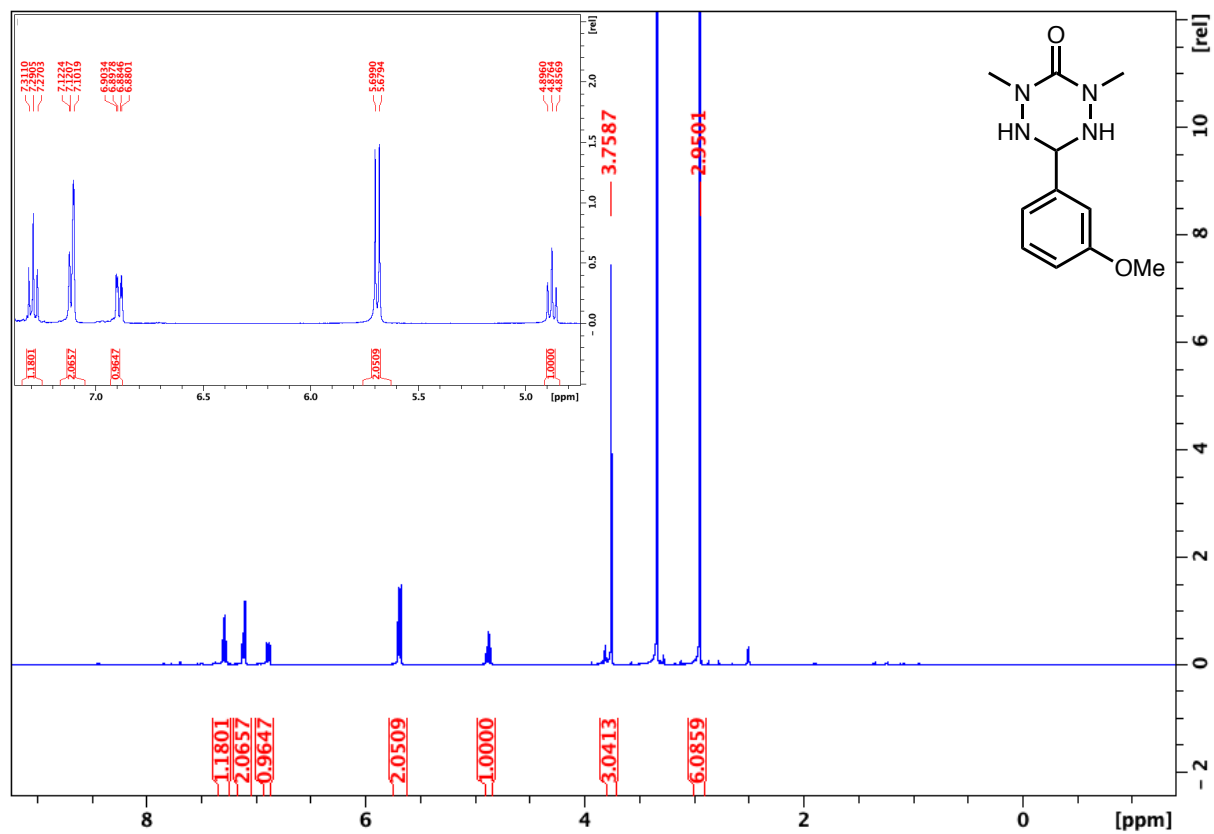

Fig. S29:  $^1\text{H}$  NMR of 3a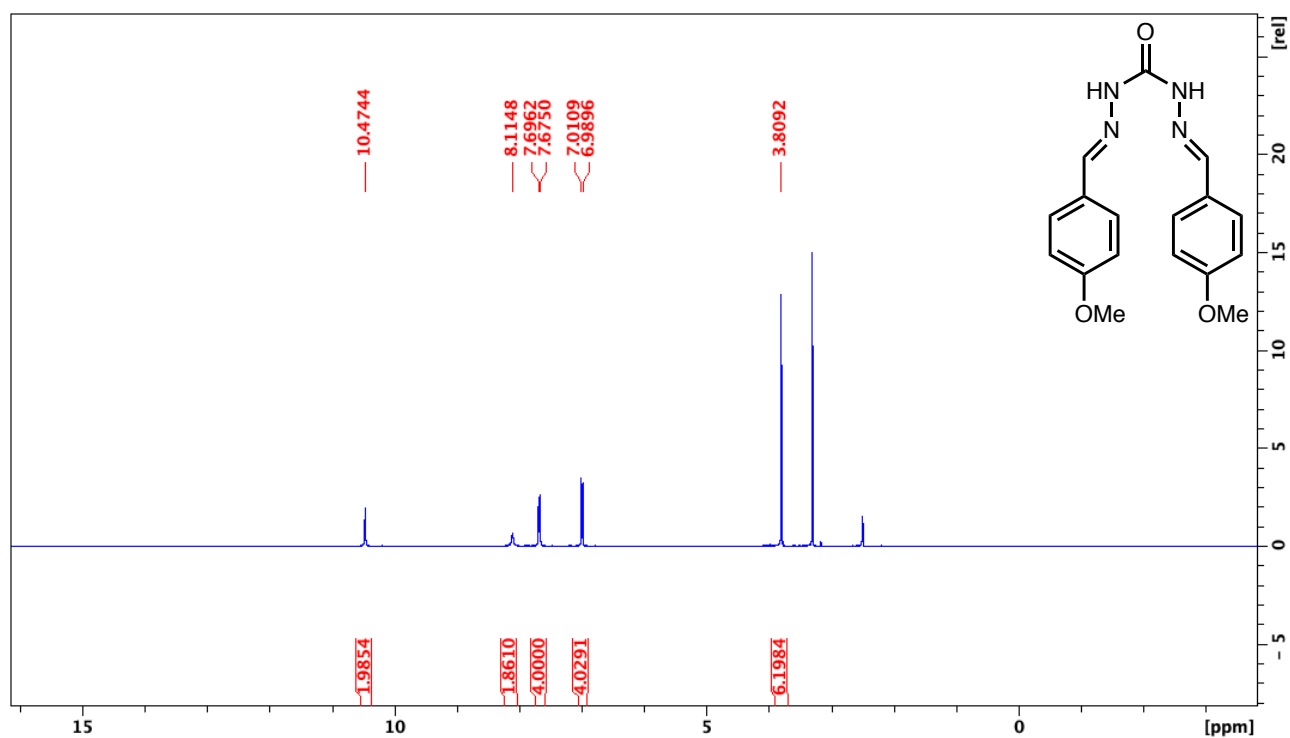Fig. S30:  $^{13}\text{C}$  NMR of 3a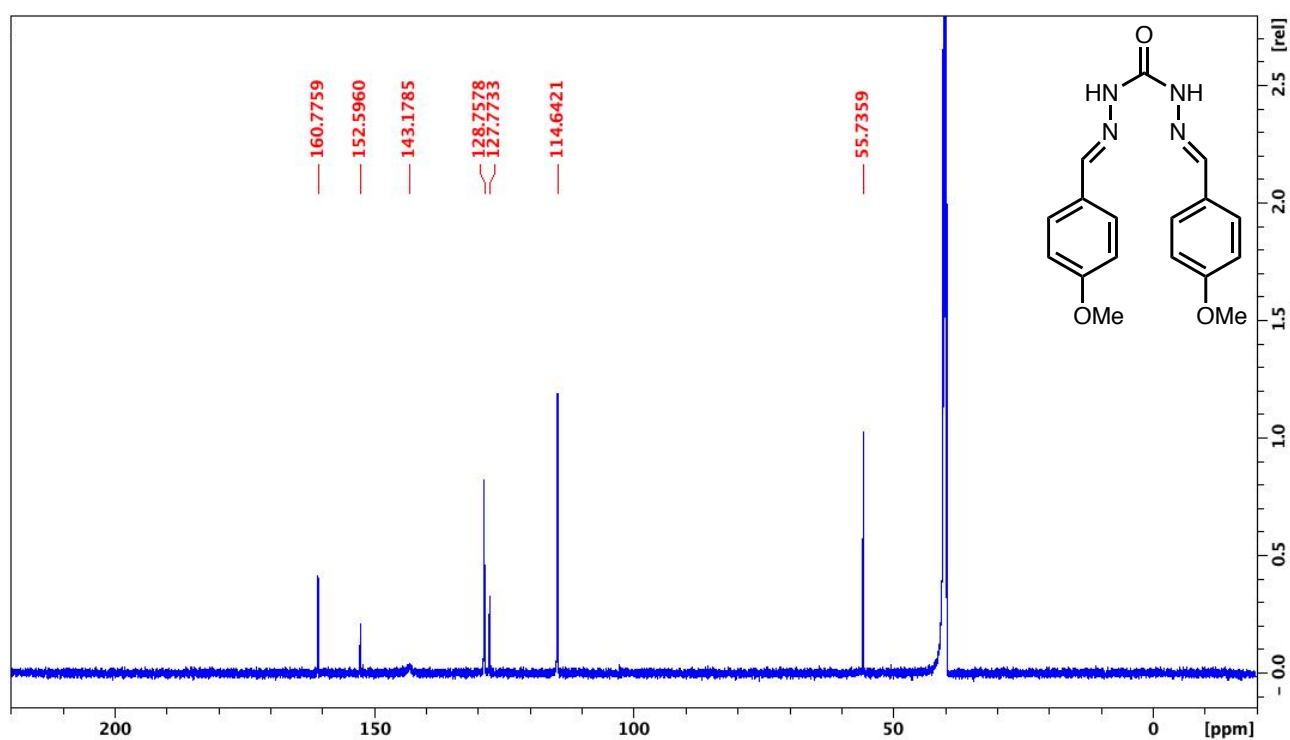

Fig. S31:  $^1\text{H}$  NMR of **3b**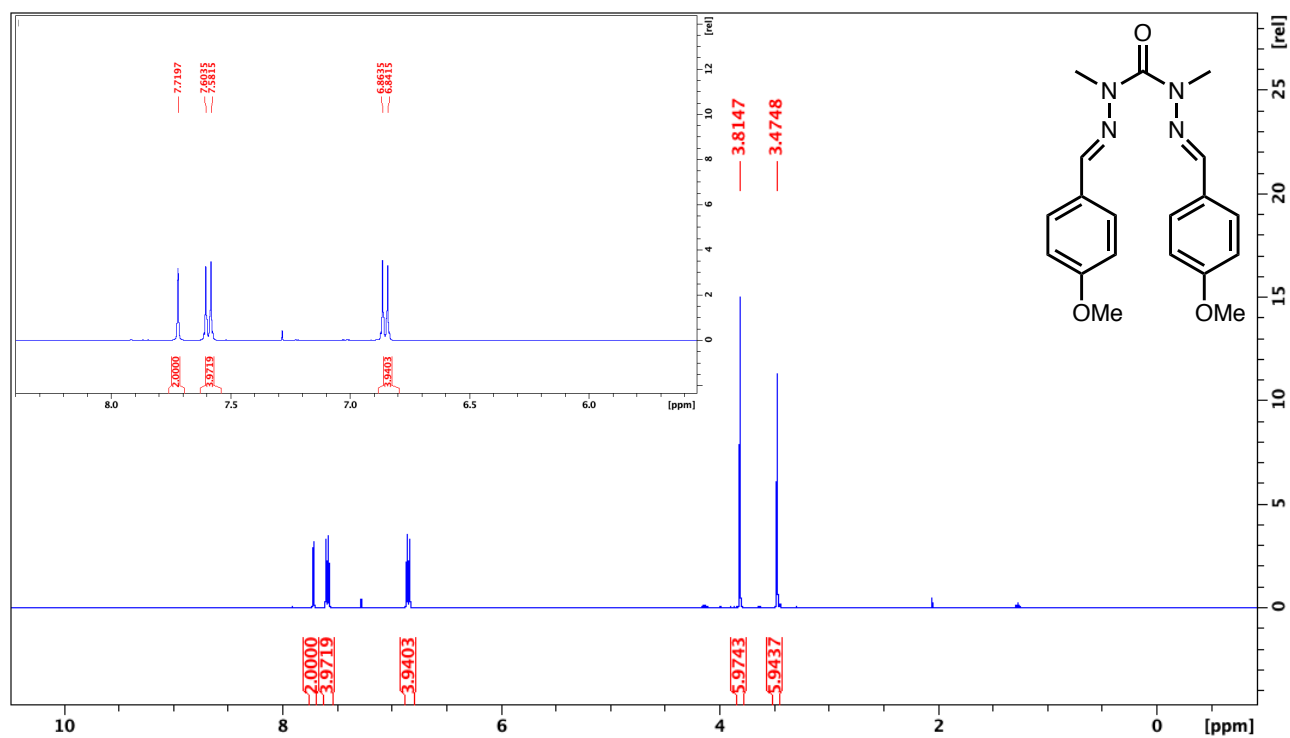Fig. S32:  $^{13}\text{C}$  NMR of **3b**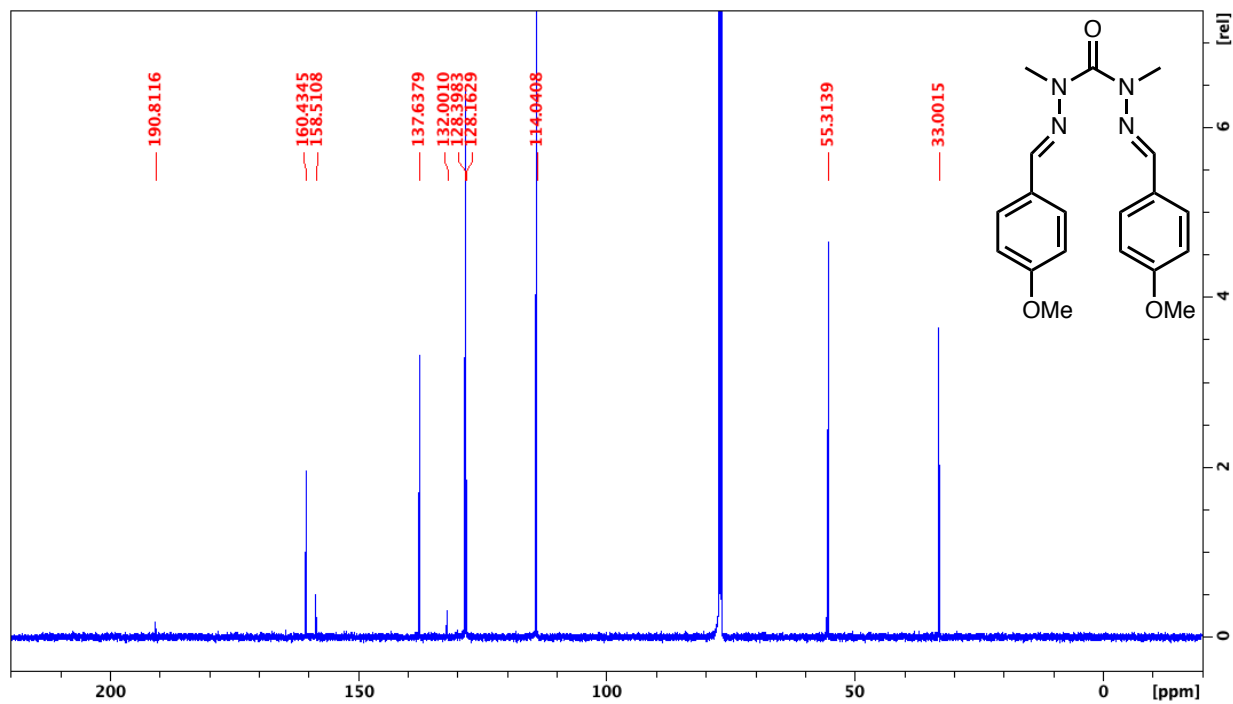

**Fig. S33:**  $^1\text{H}$  NMR **3b** (crude) – used directly in ring closure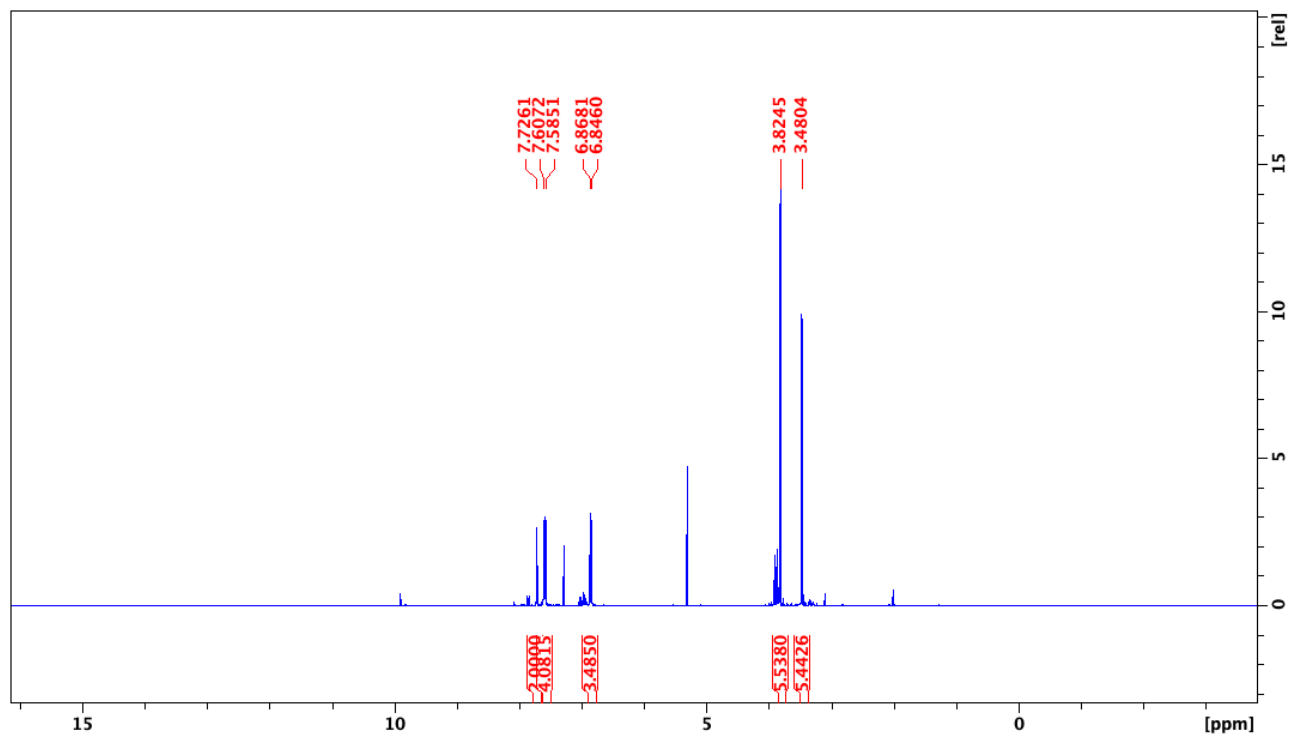

The crude **3b** contains a small amount of the monomethylated product and can be used directly in the synthesis of **3c** with little impact on the yield.

**Fig. S34:**  $^1\text{H}$  NMR of **3c**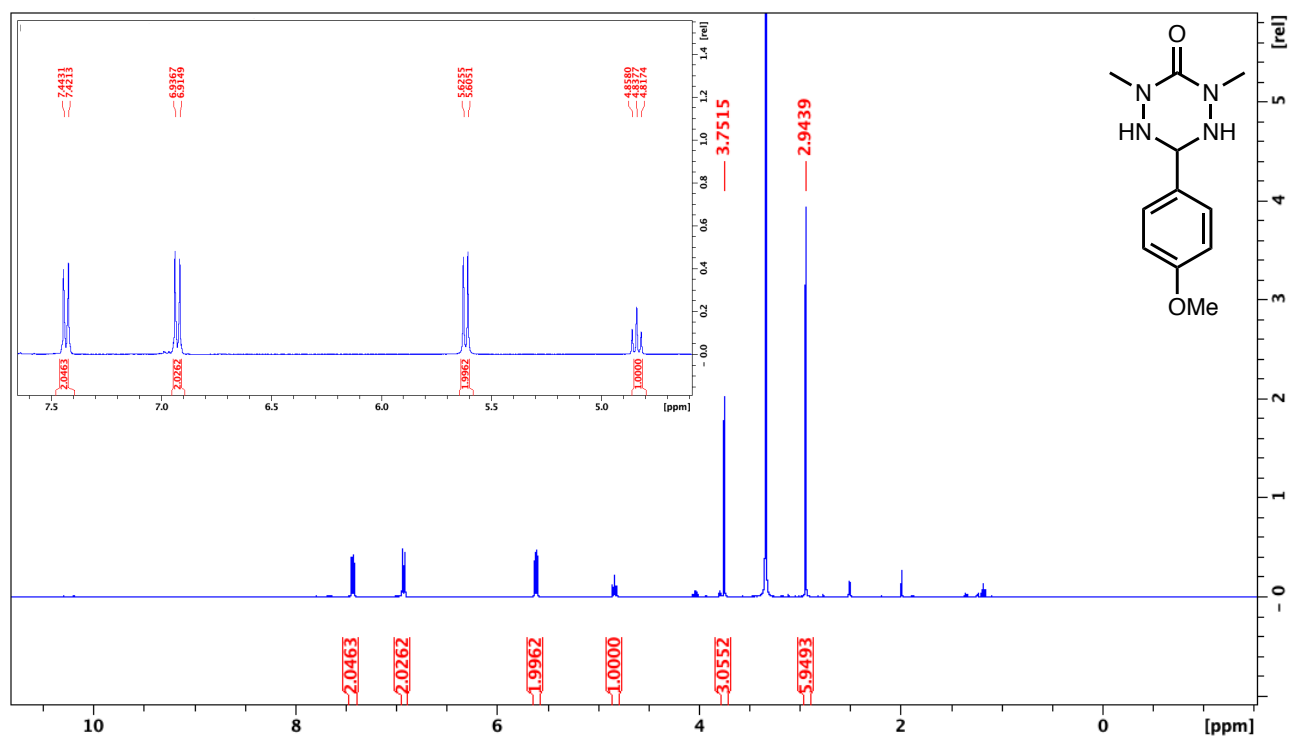

Fig. S35:  $^{13}\text{C}$  NMR of **3c**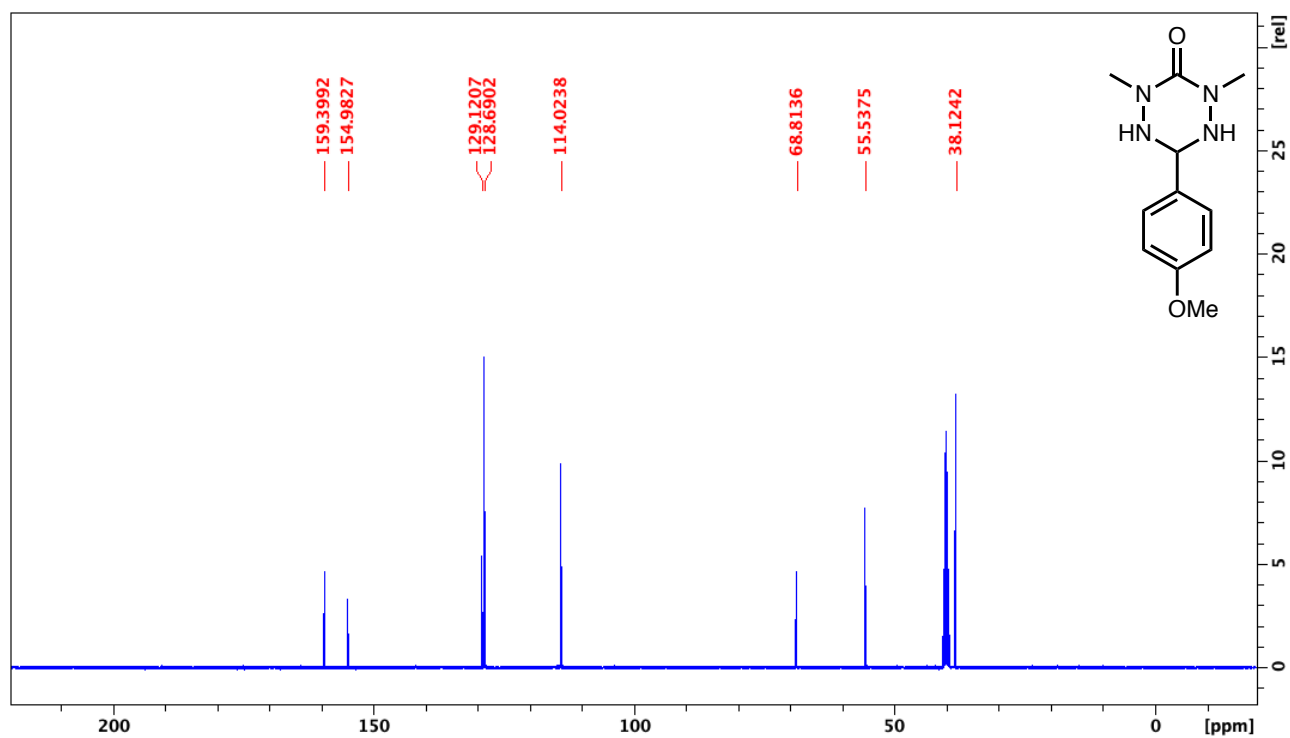Fig. S36:  $^1\text{H}$  NMR of **4a**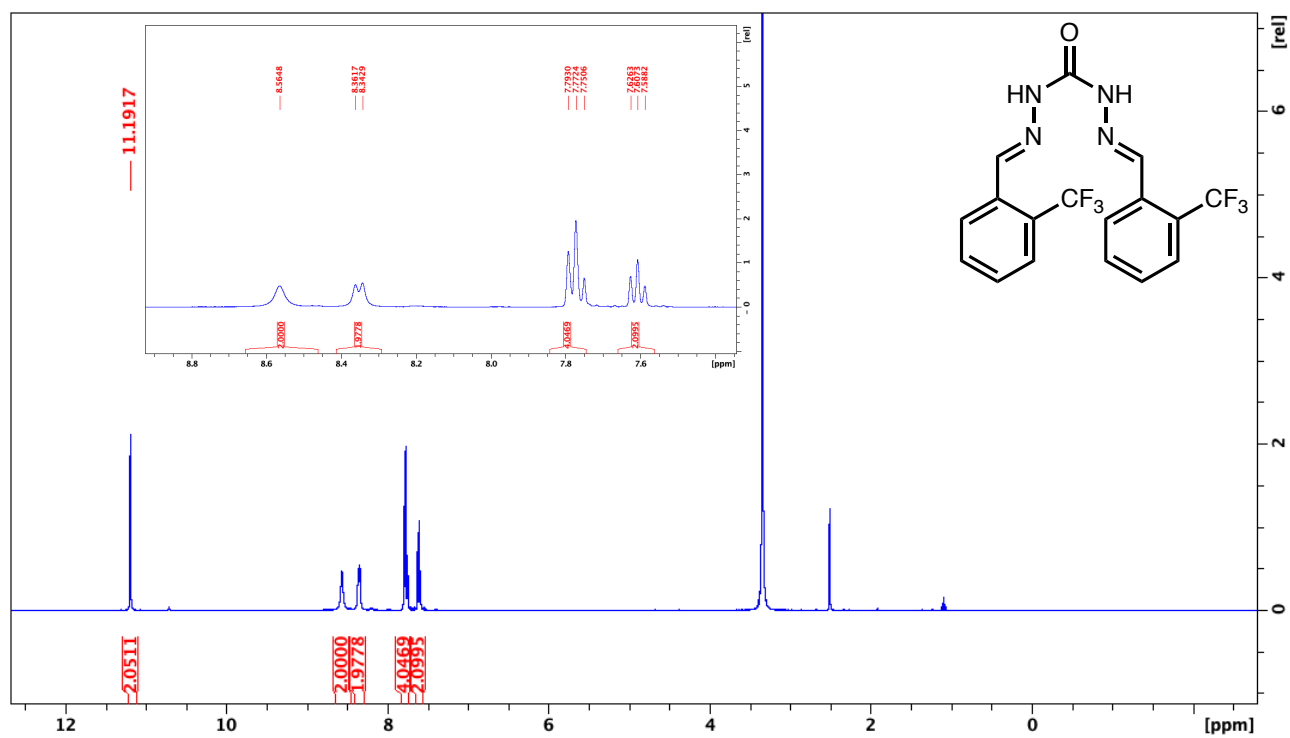

Fig. S37:  $^{13}\text{C}$  NMR of 4a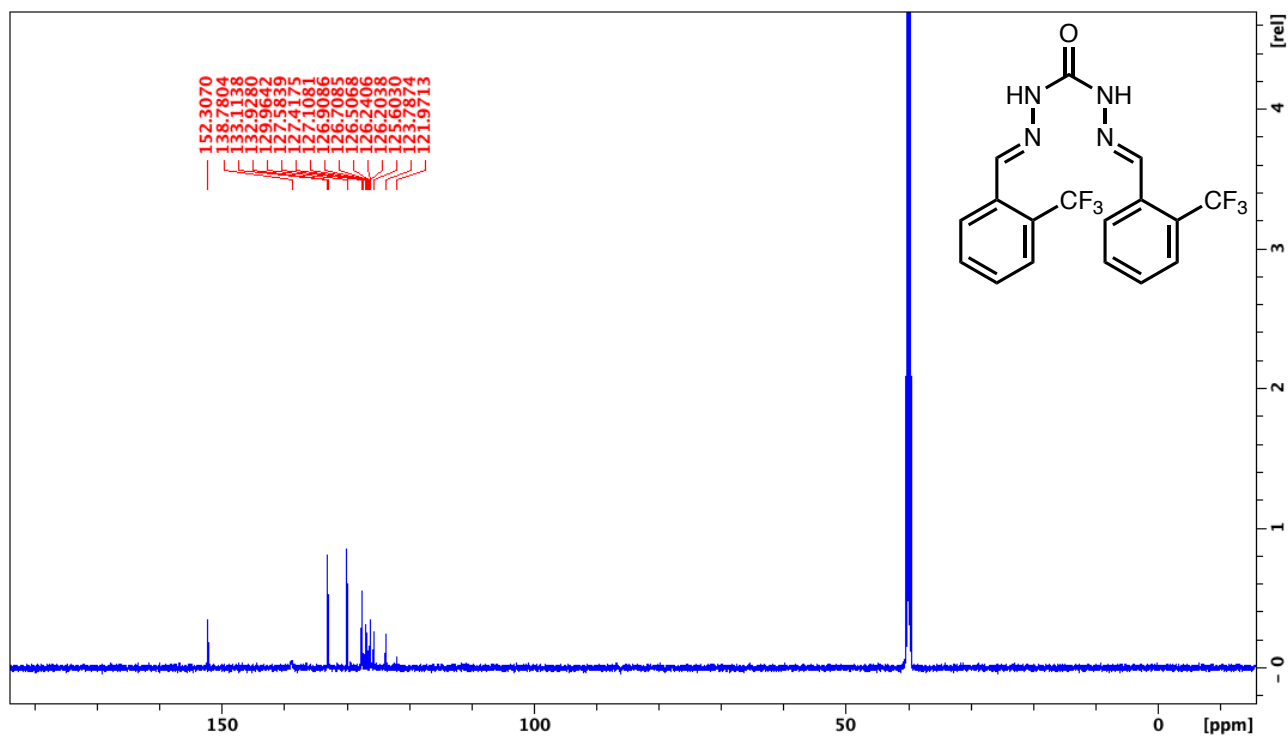Fig. S38:  $^{19}\text{F}$  NMR of 4a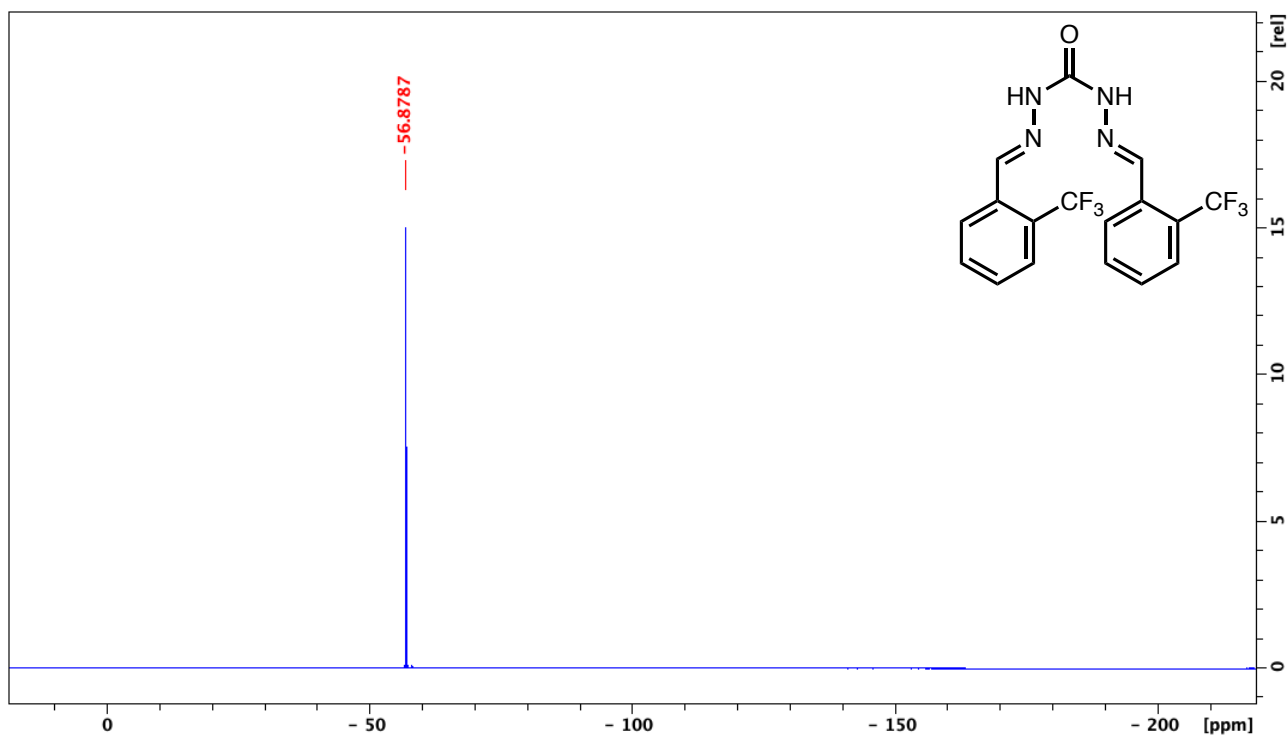



Fig. S39:  $^1\text{H}$  NMR of **4b**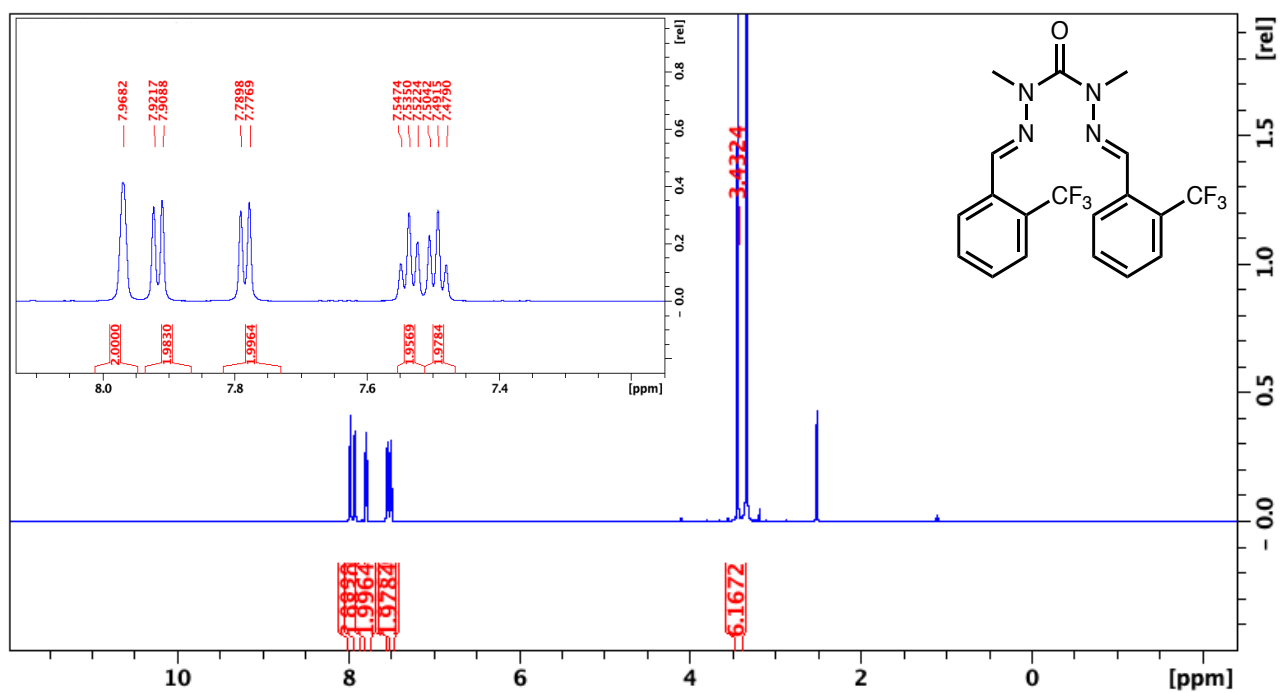Fig. S40:  $^{13}\text{C}$  NMR of **4b**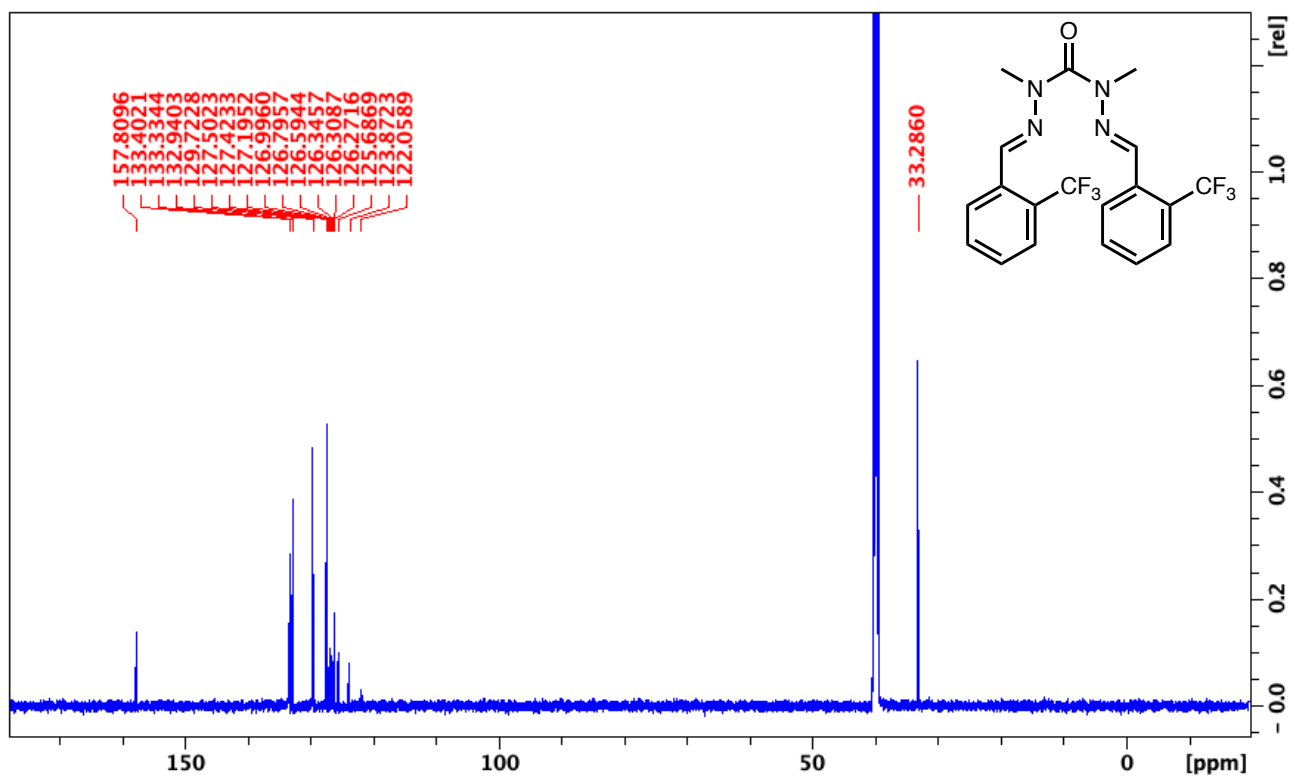

Fig. S41:  $^{19}\text{F}$  NMR of **4b**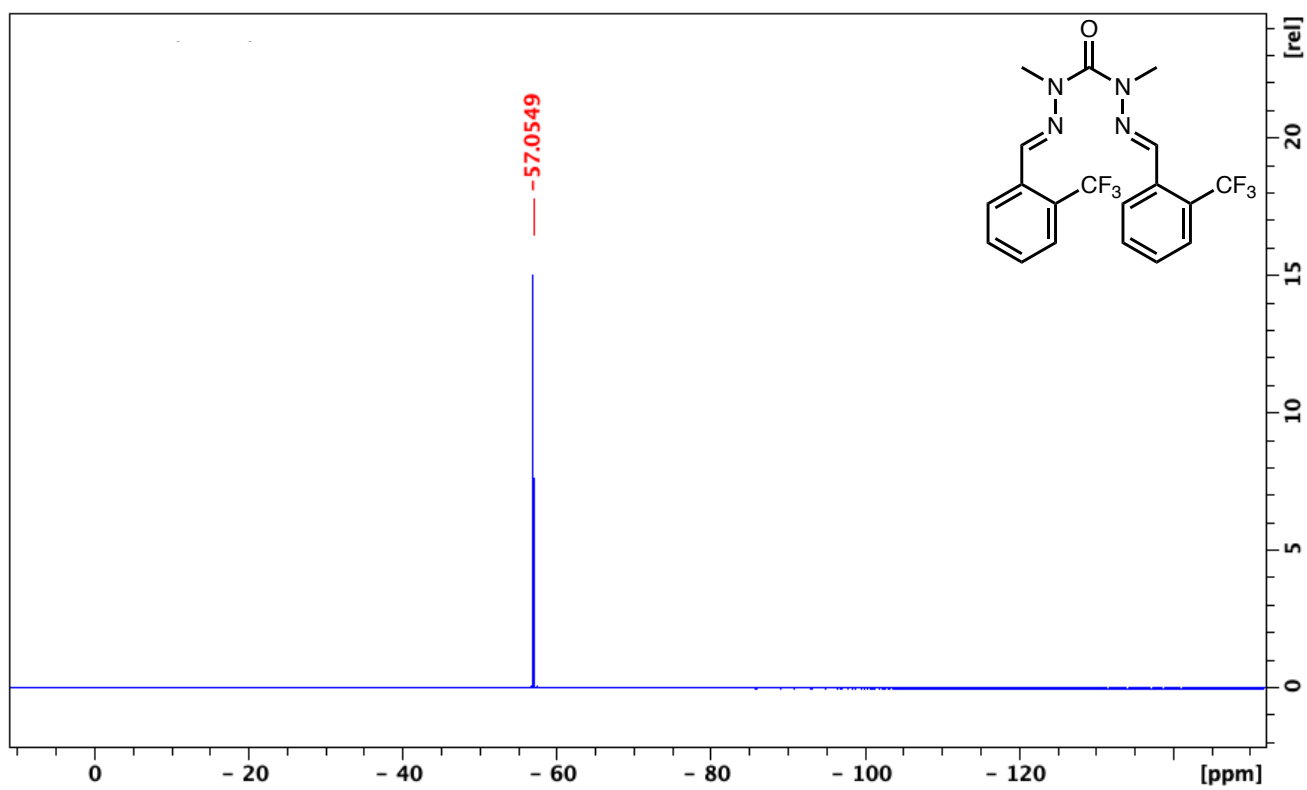Fig. S42:  $^1\text{H}$  NMR of **4c**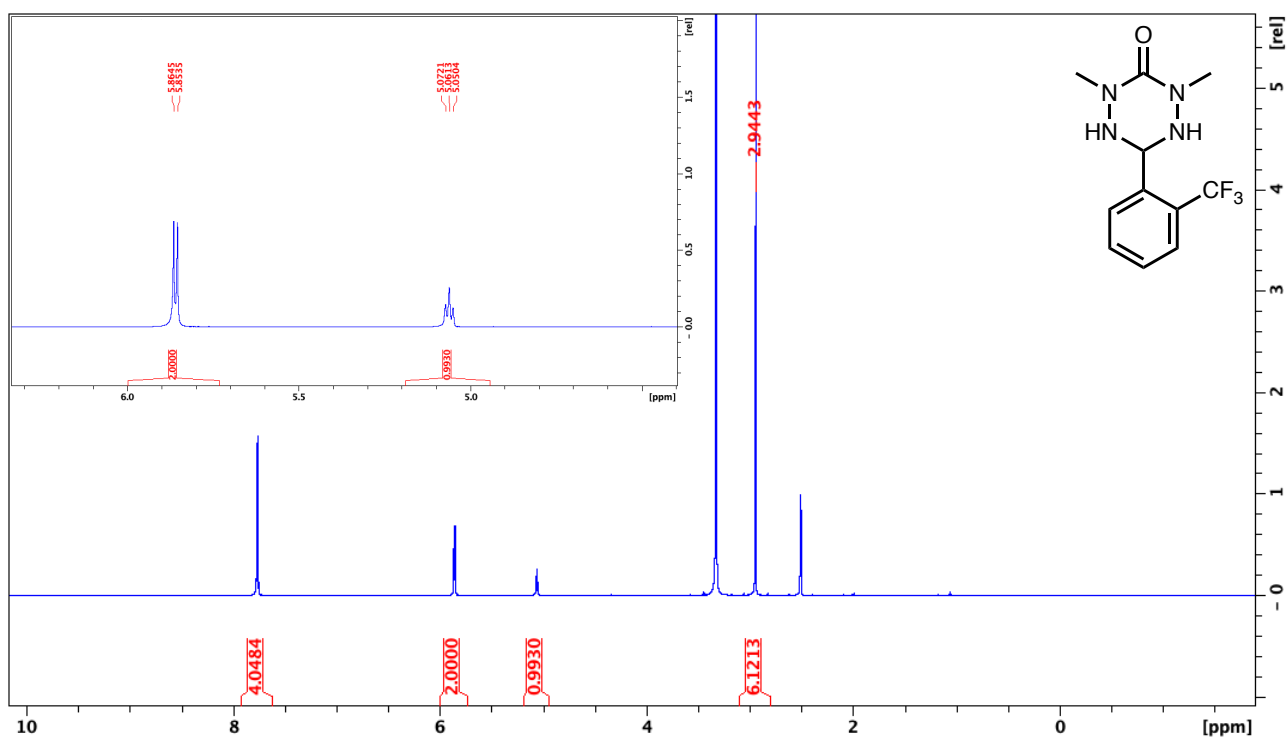

Fig. S43:  $^{13}\text{C}$  NMR of 4c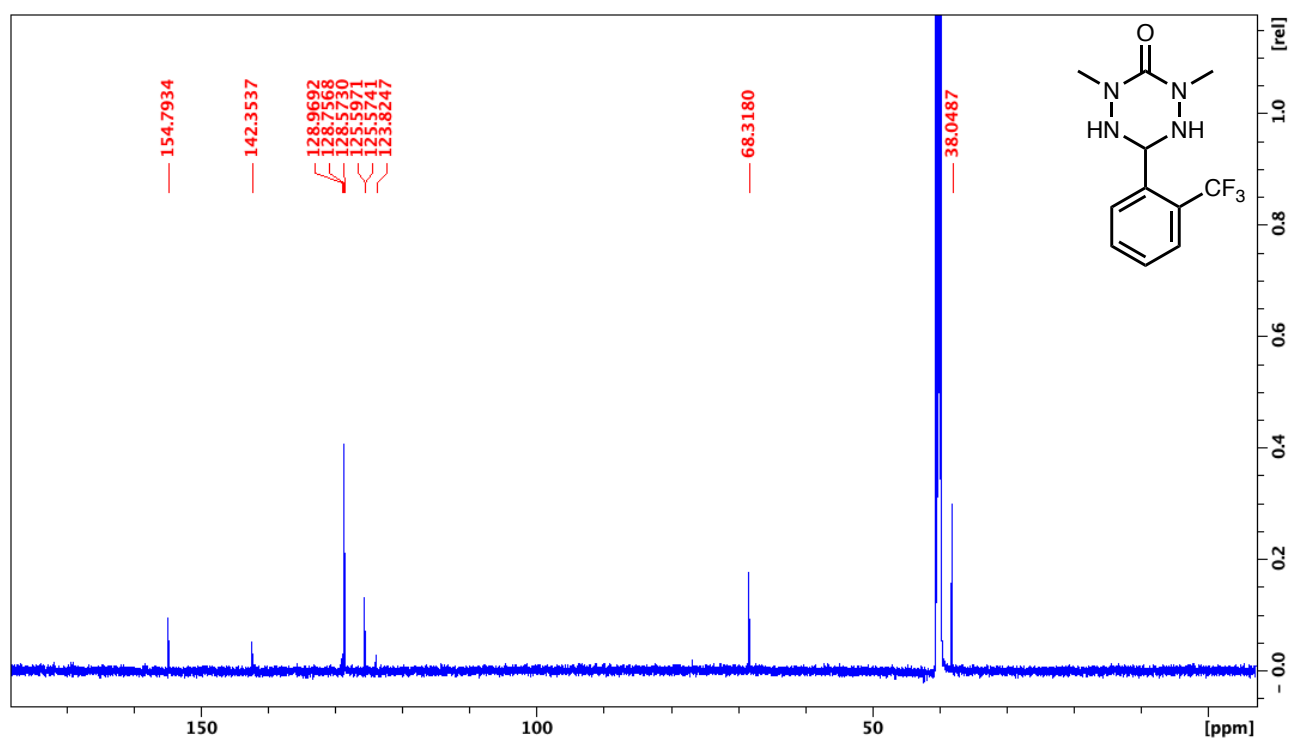Fig. S44:  $^{19}\text{F}$  NMR of 4c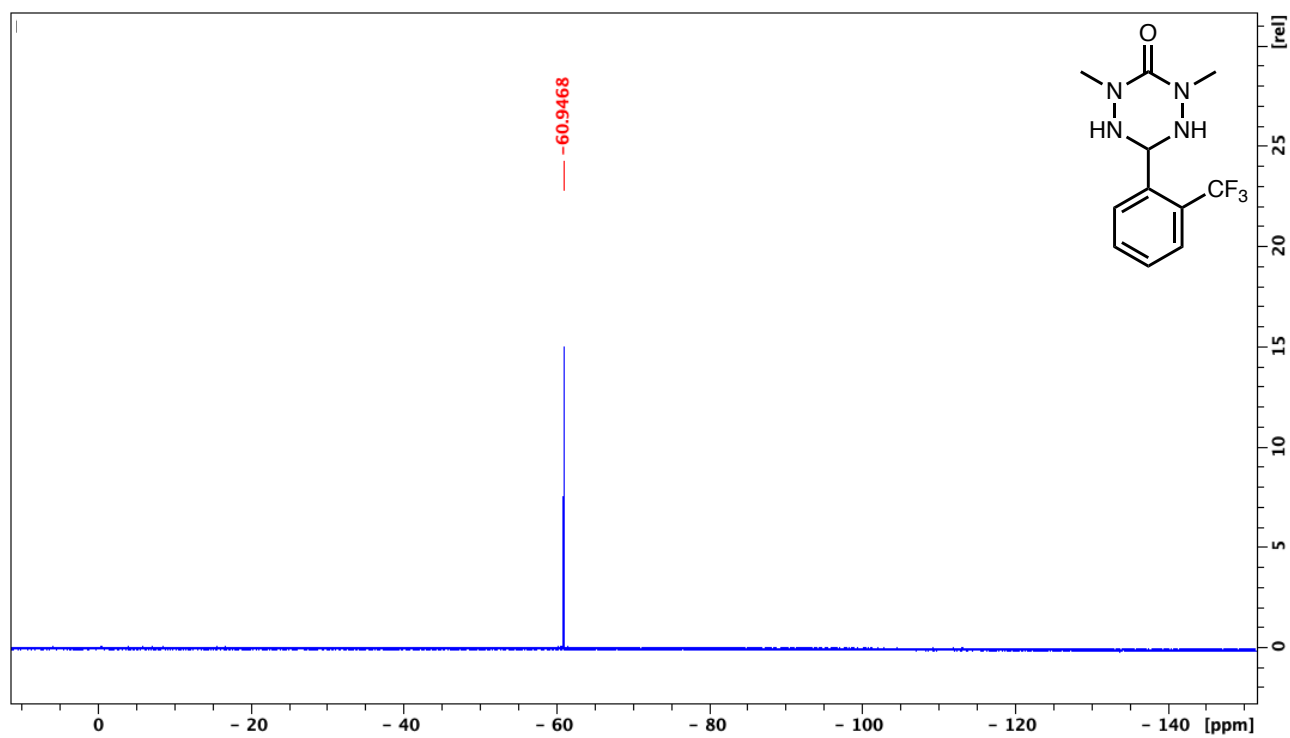

Fig. S45:  $^1\text{H}$  NMR of 5a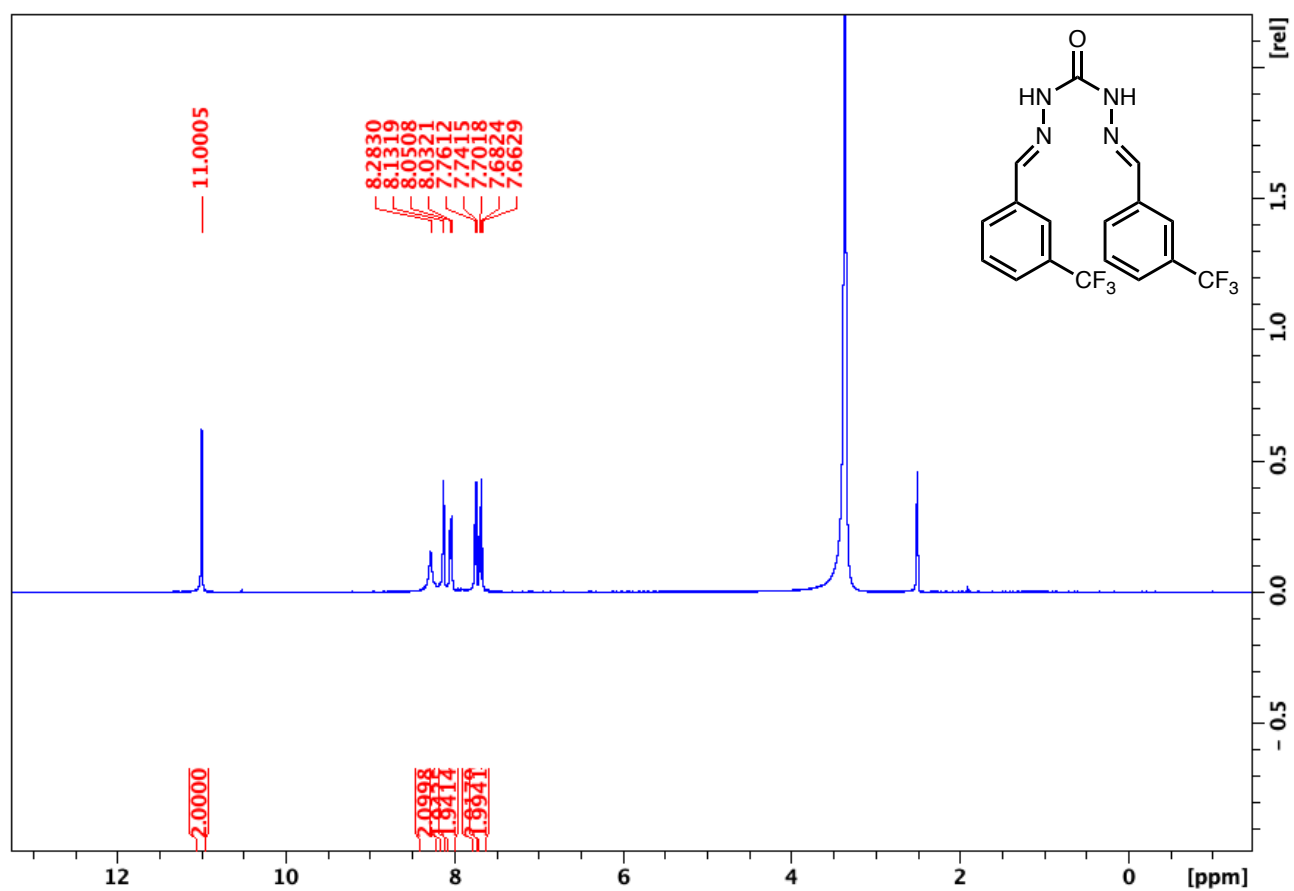Fig. S46:  $^{13}\text{C}$  NMR of 5a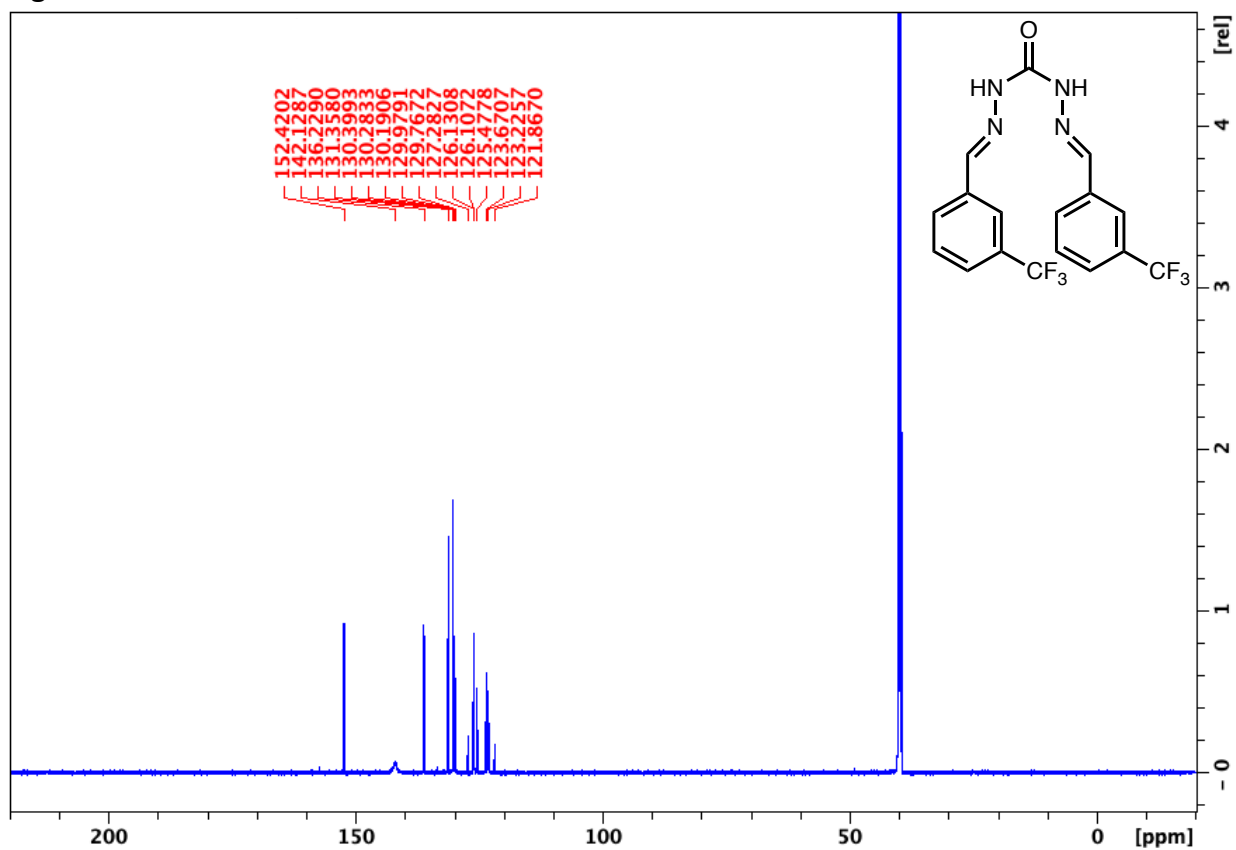

Fig. S47:  $^{19}\text{F}$  NMR of 5a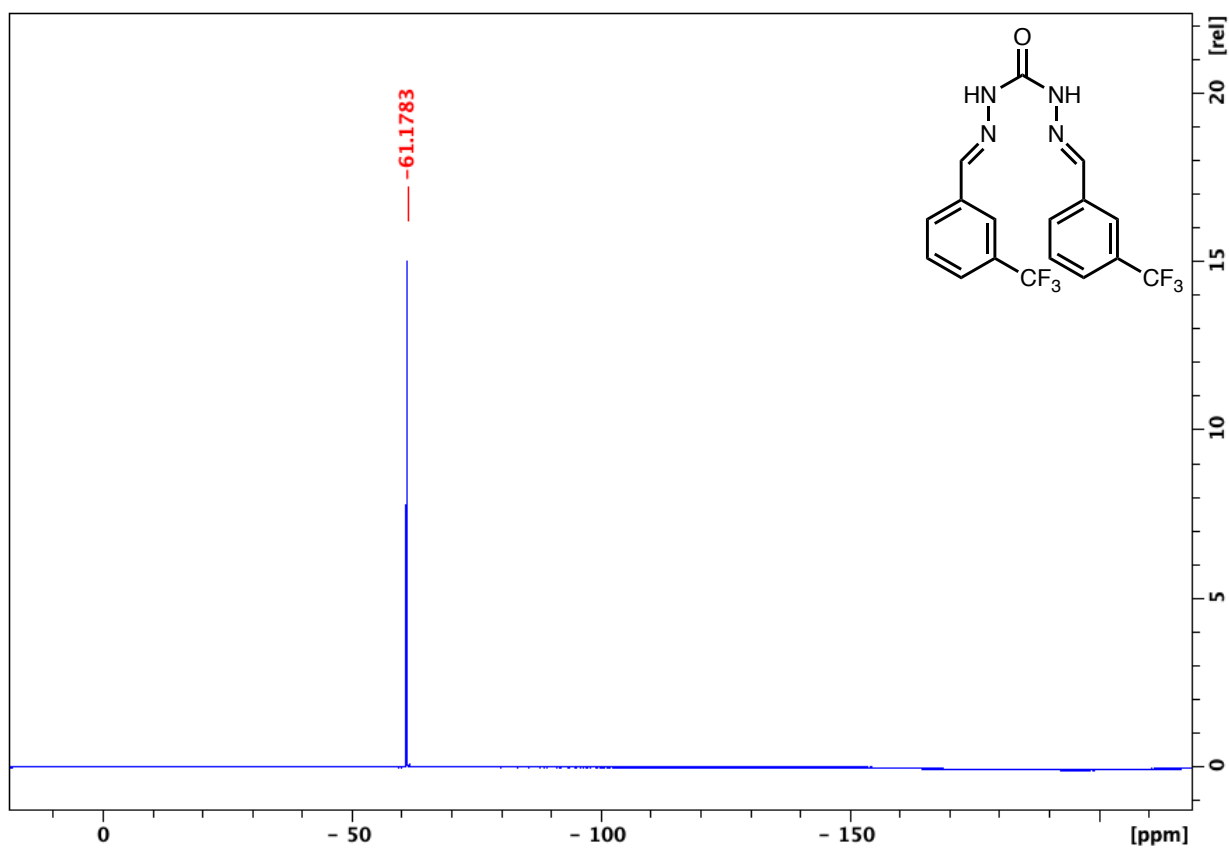Fig. S48:  $^1\text{H}$  NMR of 5b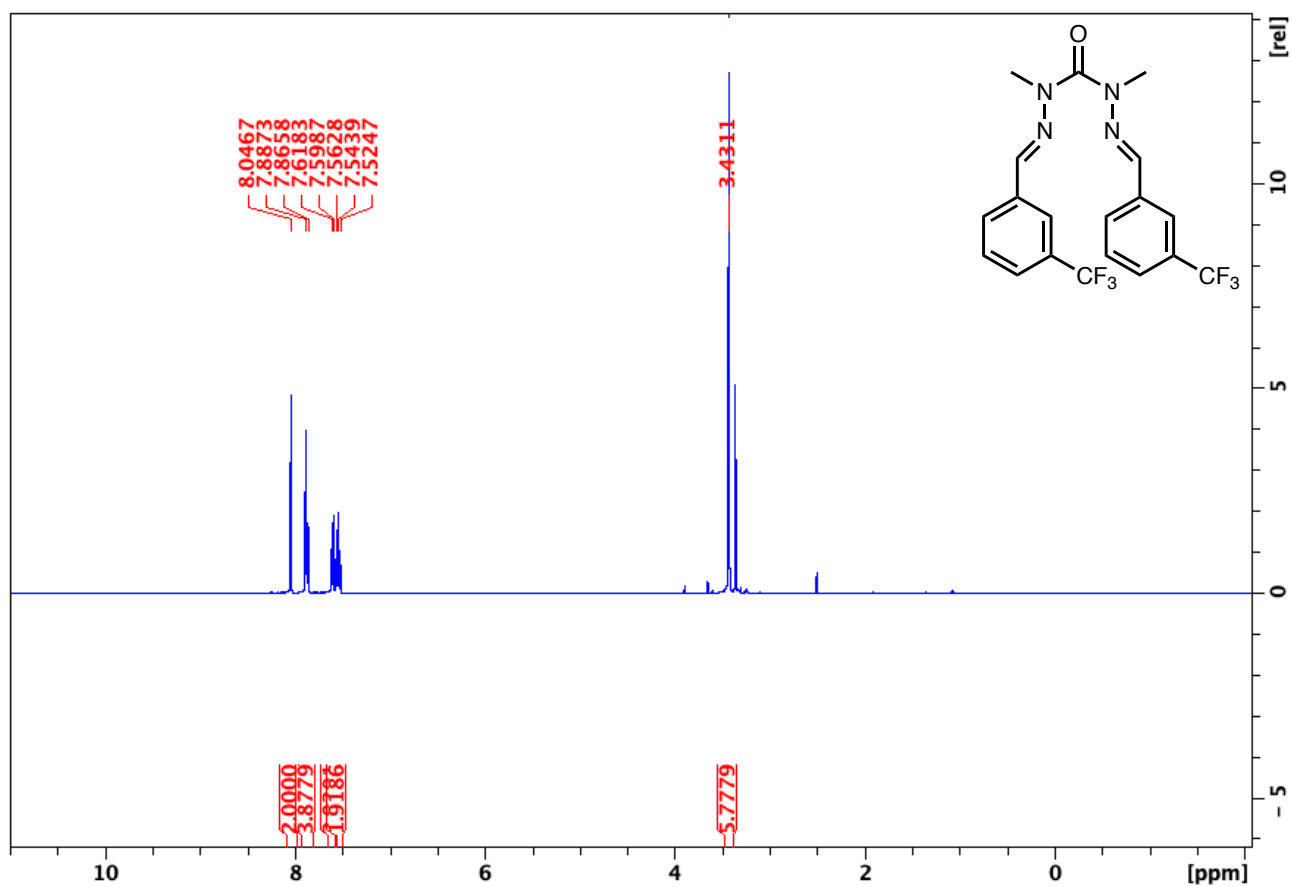

Fig. S49:  $^{13}\text{C}$  NMR of **5b**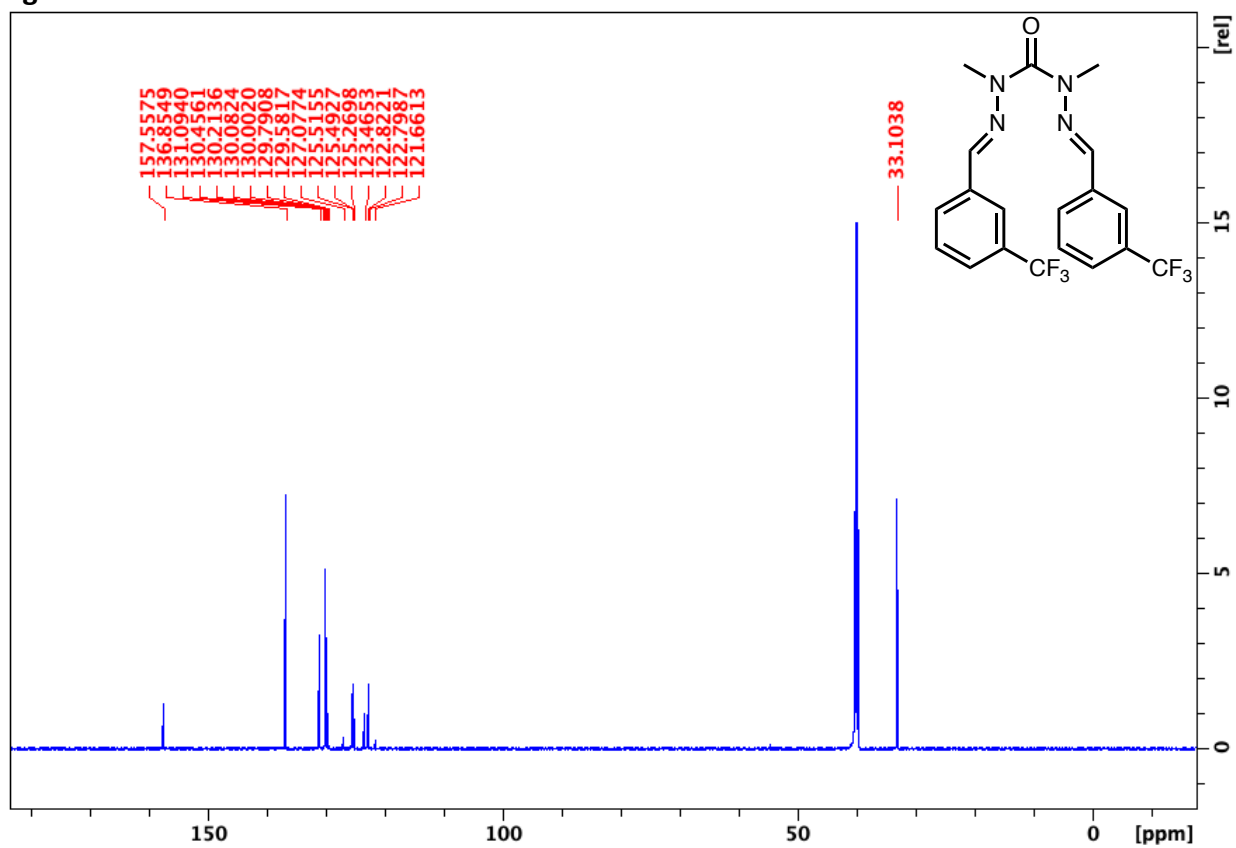Fig. S50:  $^{19}\text{F}$  NMR of **5b**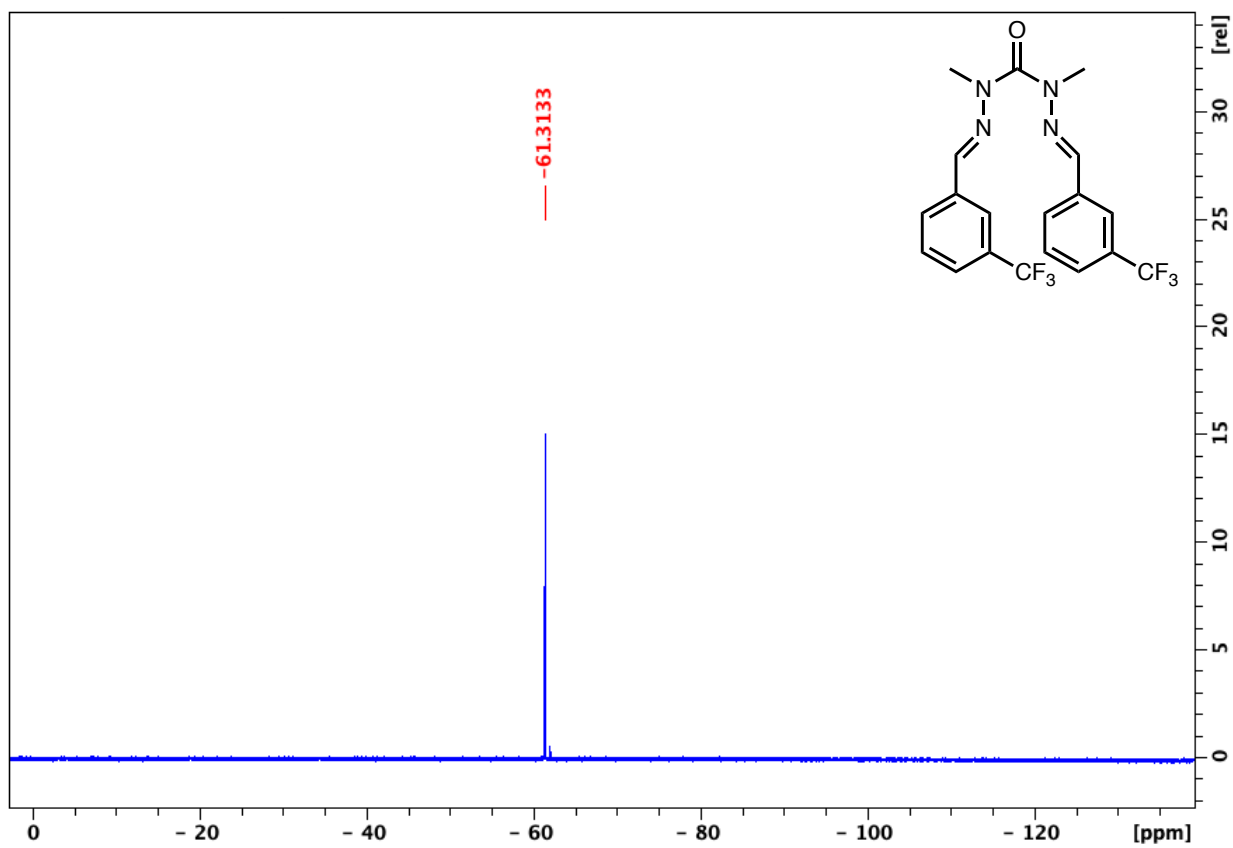

Fig. S51:  $^1\text{H}$  NMR of 5c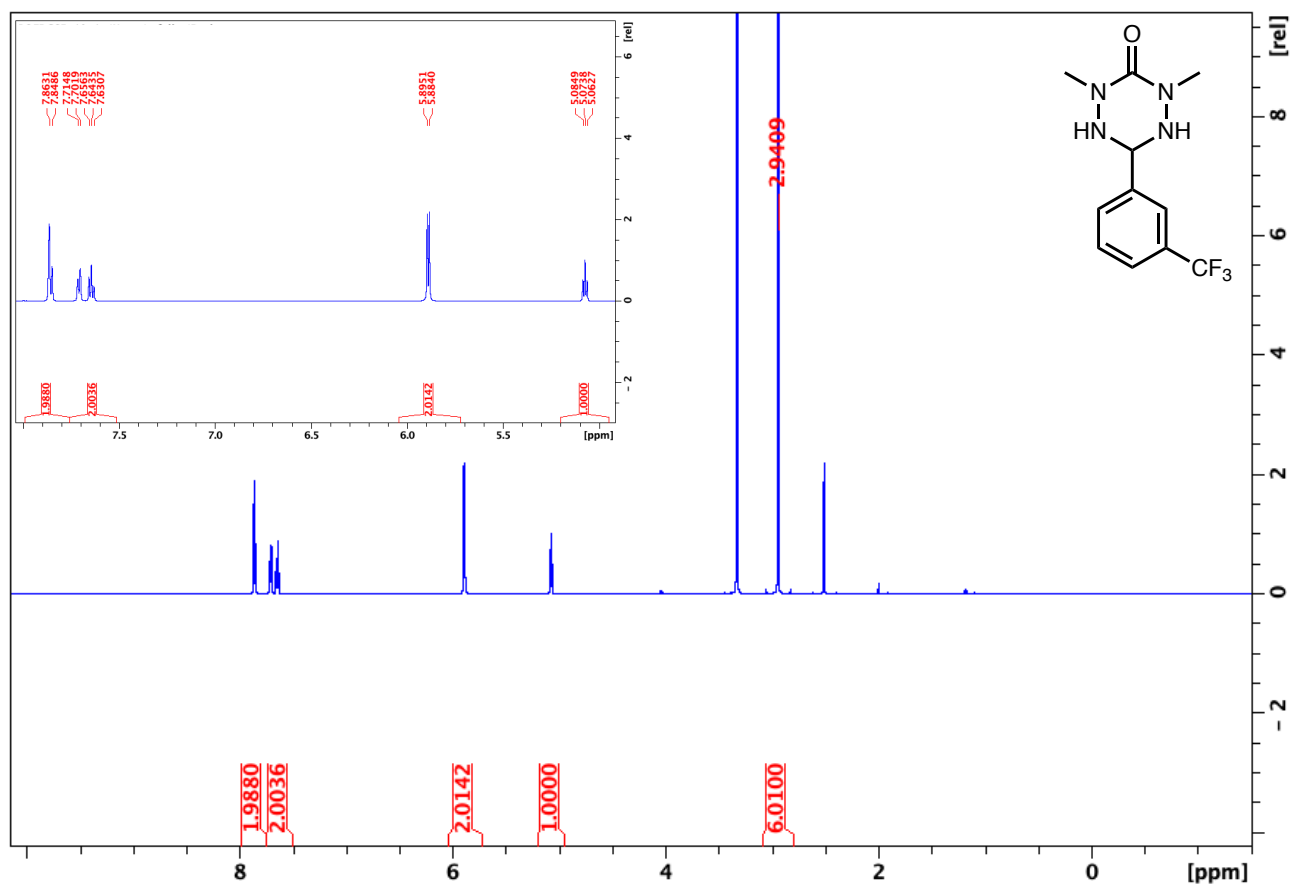Fig. S52:  $^{13}\text{C}$  NMR of 5c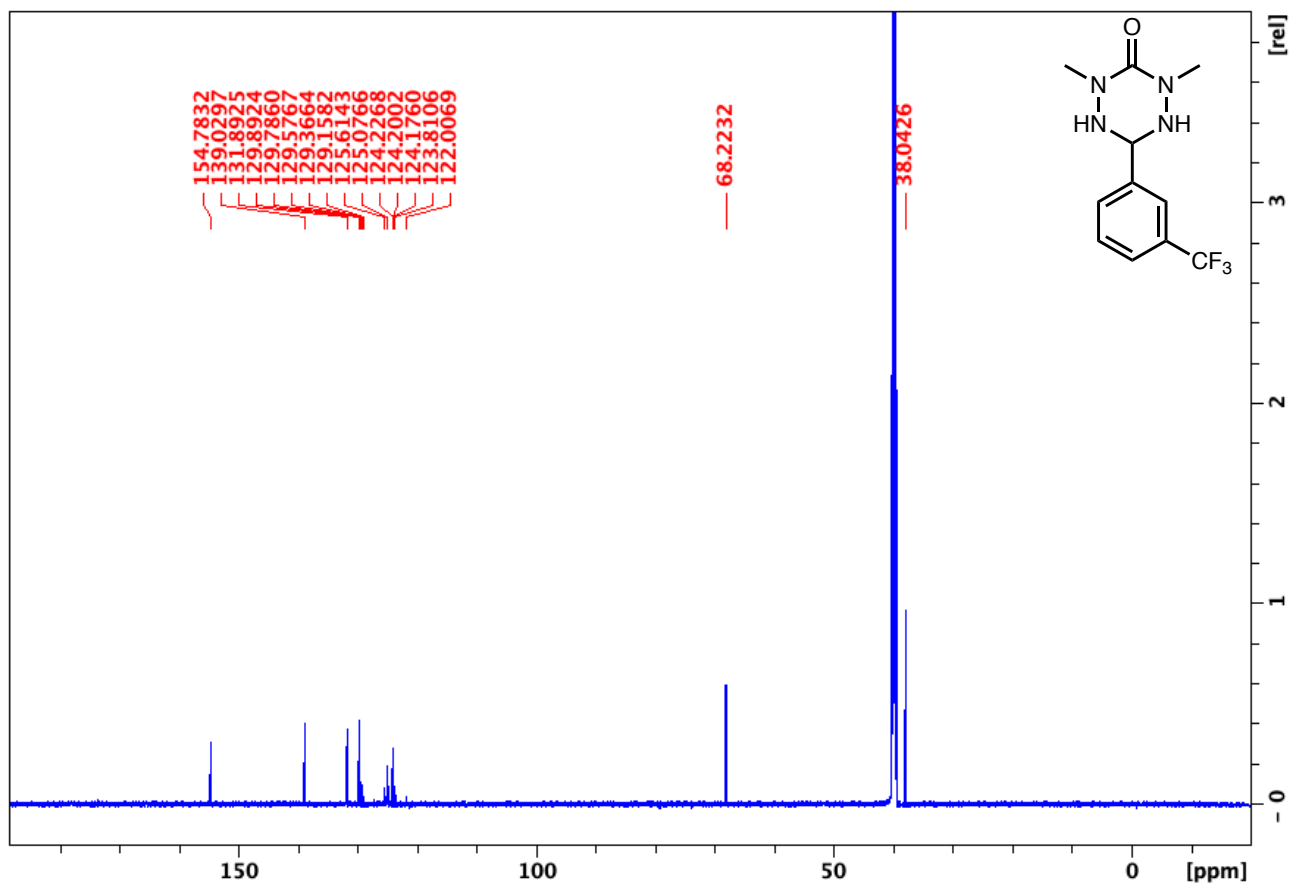

Fig. S53:  $^1\text{H}$  NMR of 6a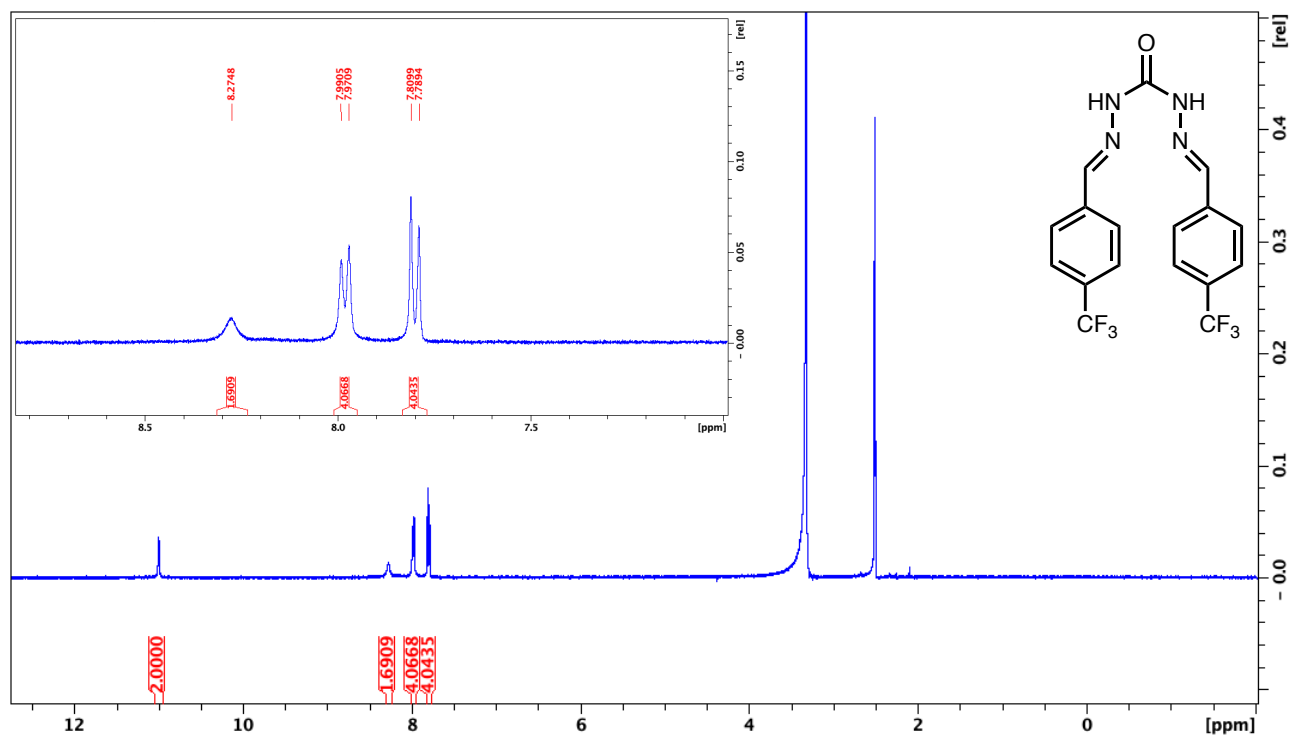Fig. S54:  $^{13}\text{C}$  NMR of 6a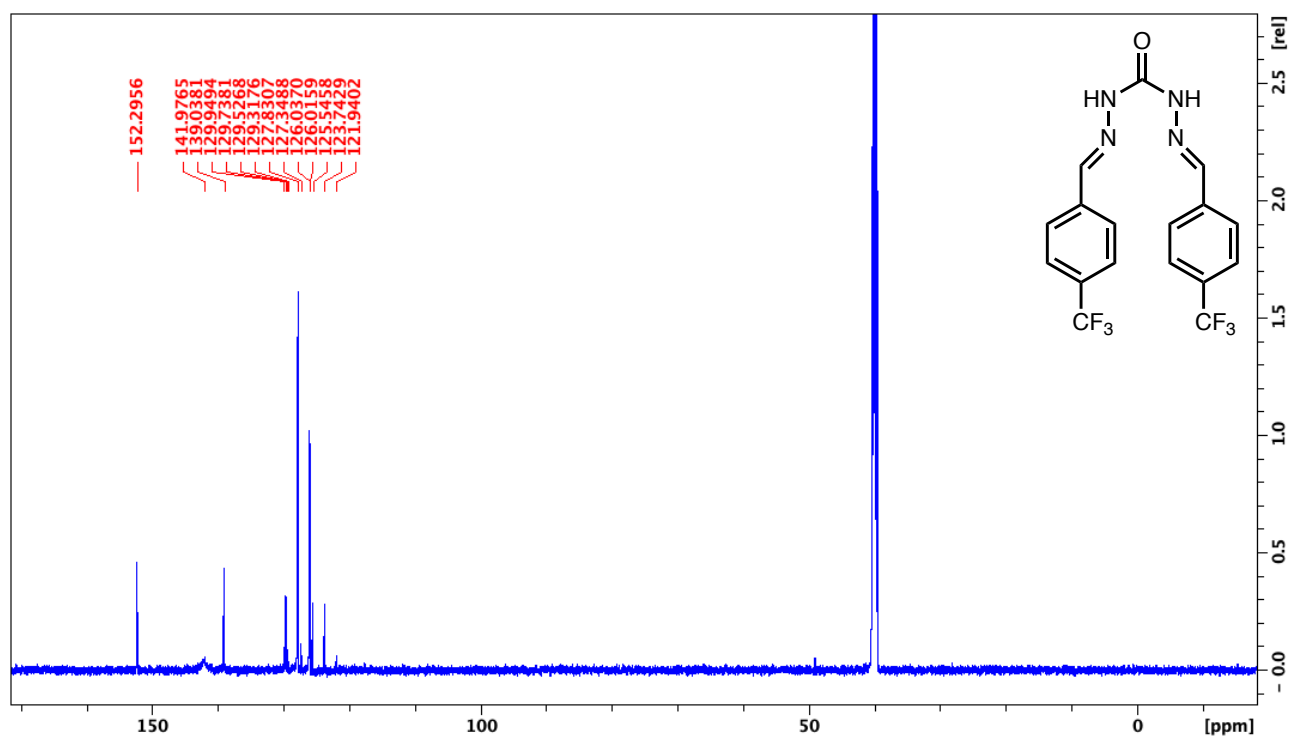



Fig. S55:  $^{19}\text{F}$  NMR of 6a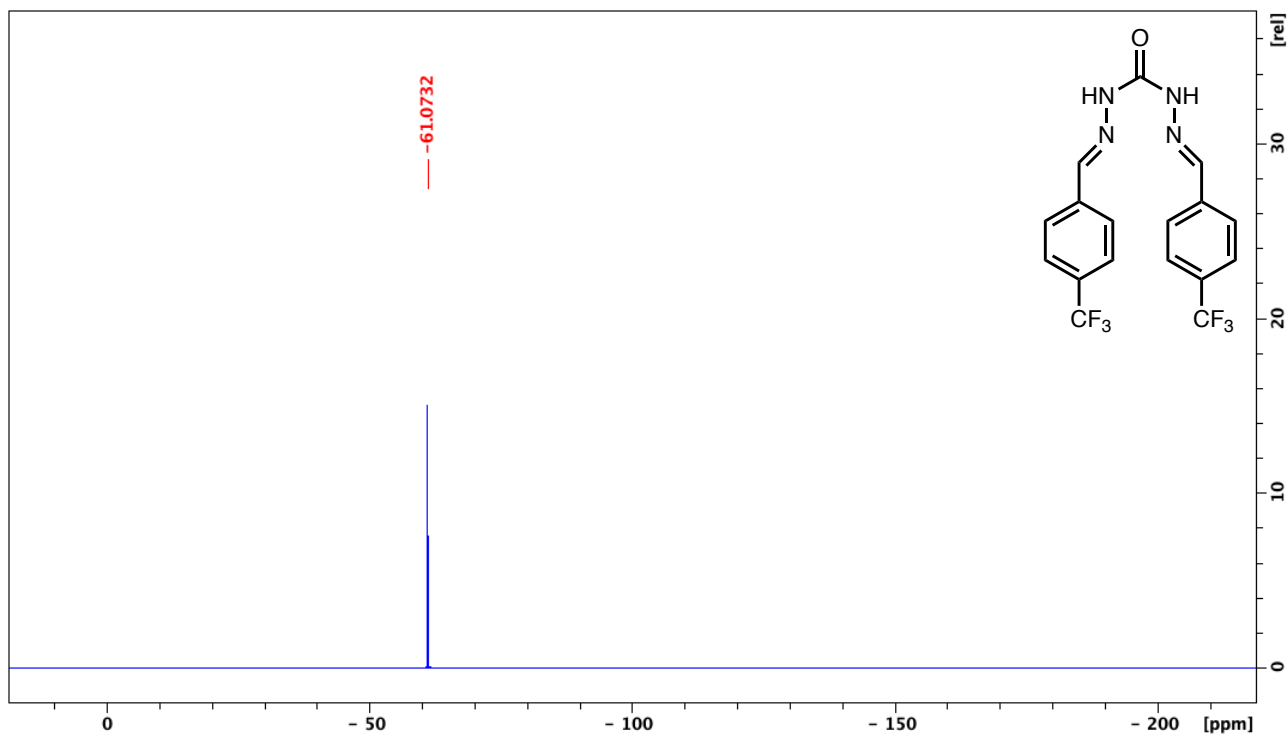Fig. S56:  $^1\text{H}$  NMR of 6b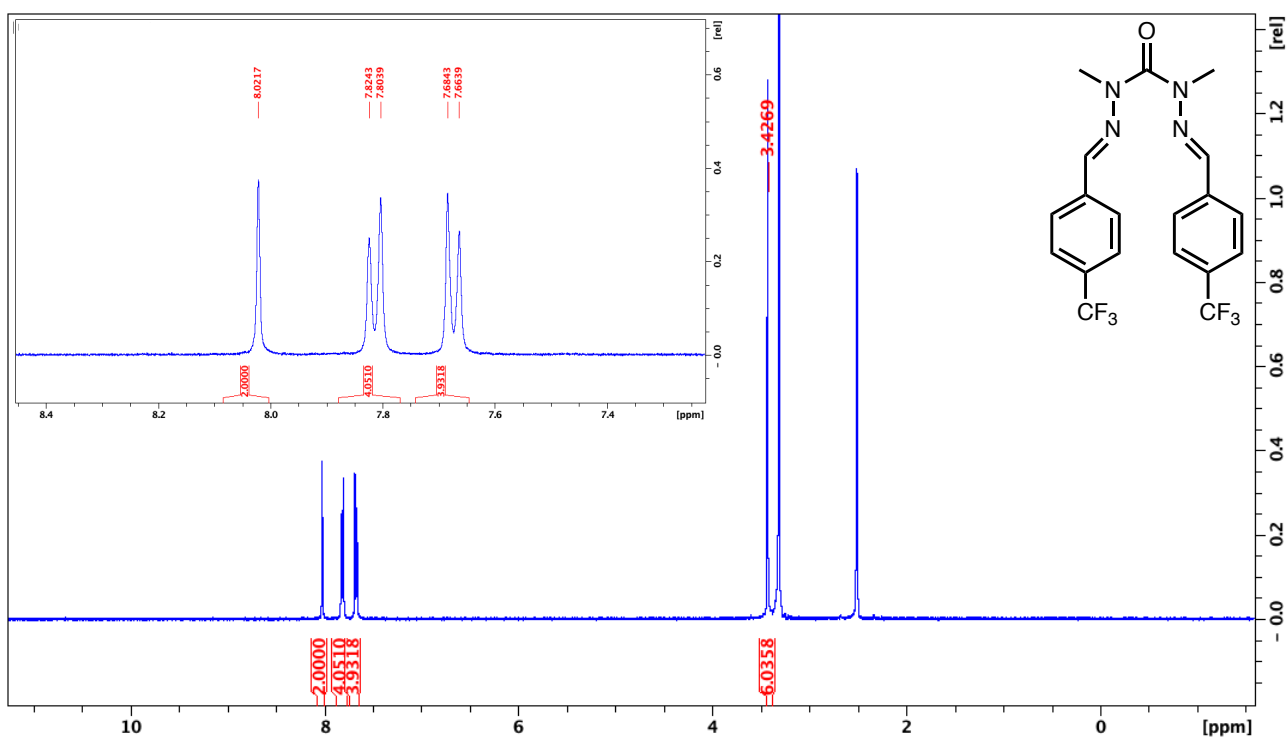

Fig. S57:  $^{13}\text{C}$  NMR of **6b**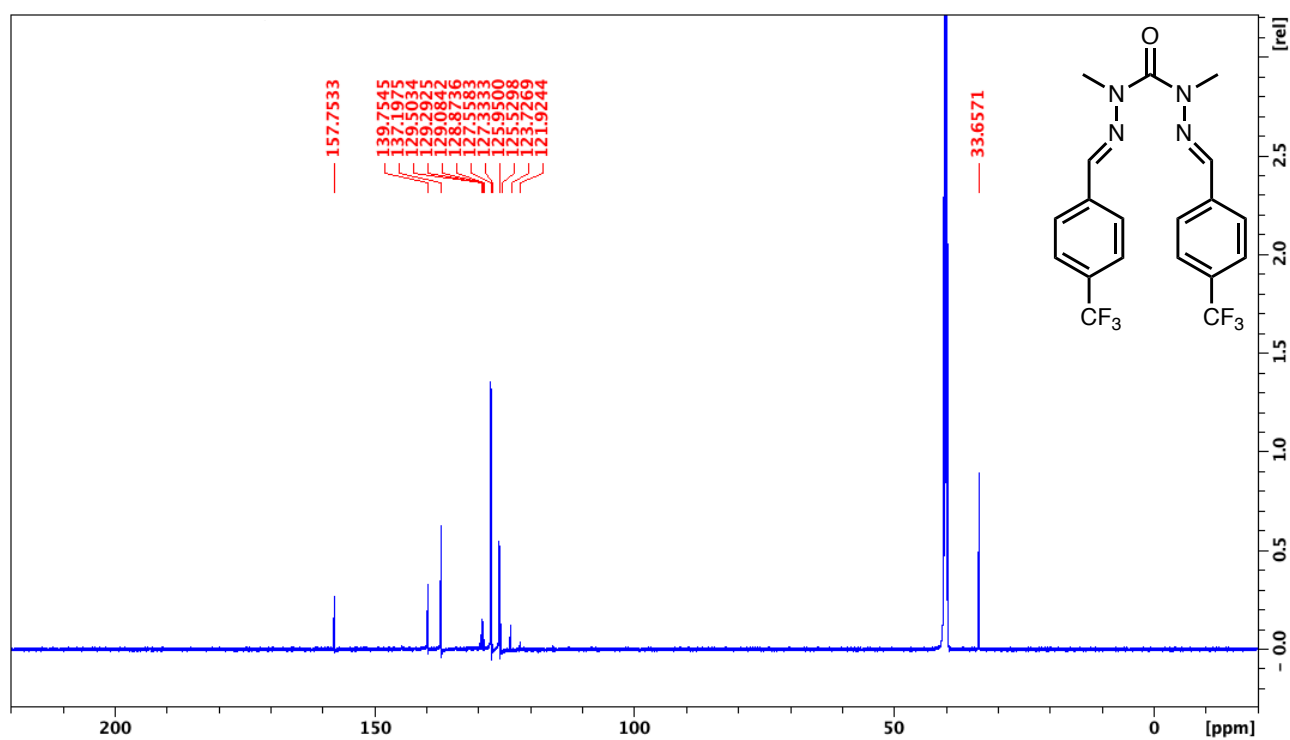Fig. S58:  $^{19}\text{F}$  NMR of **6b**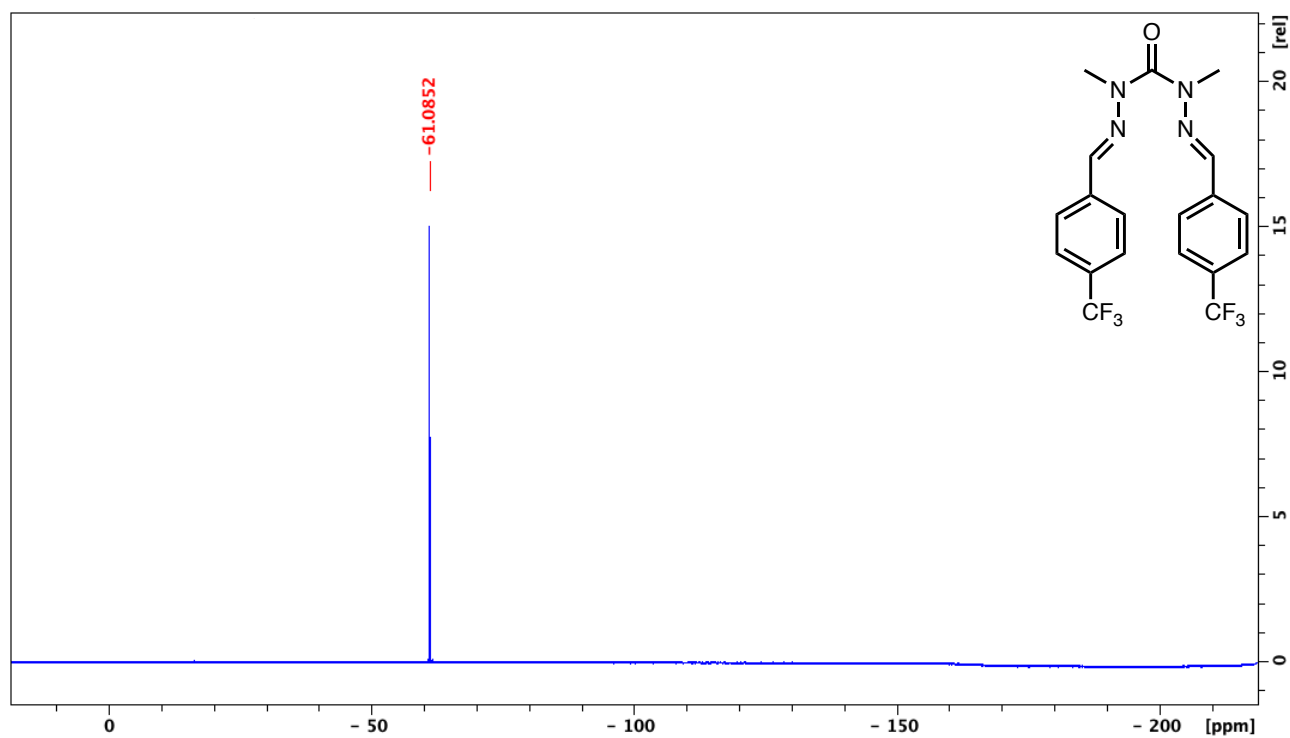

Fig. S59:  $^1\text{H}$  NMR of **6c**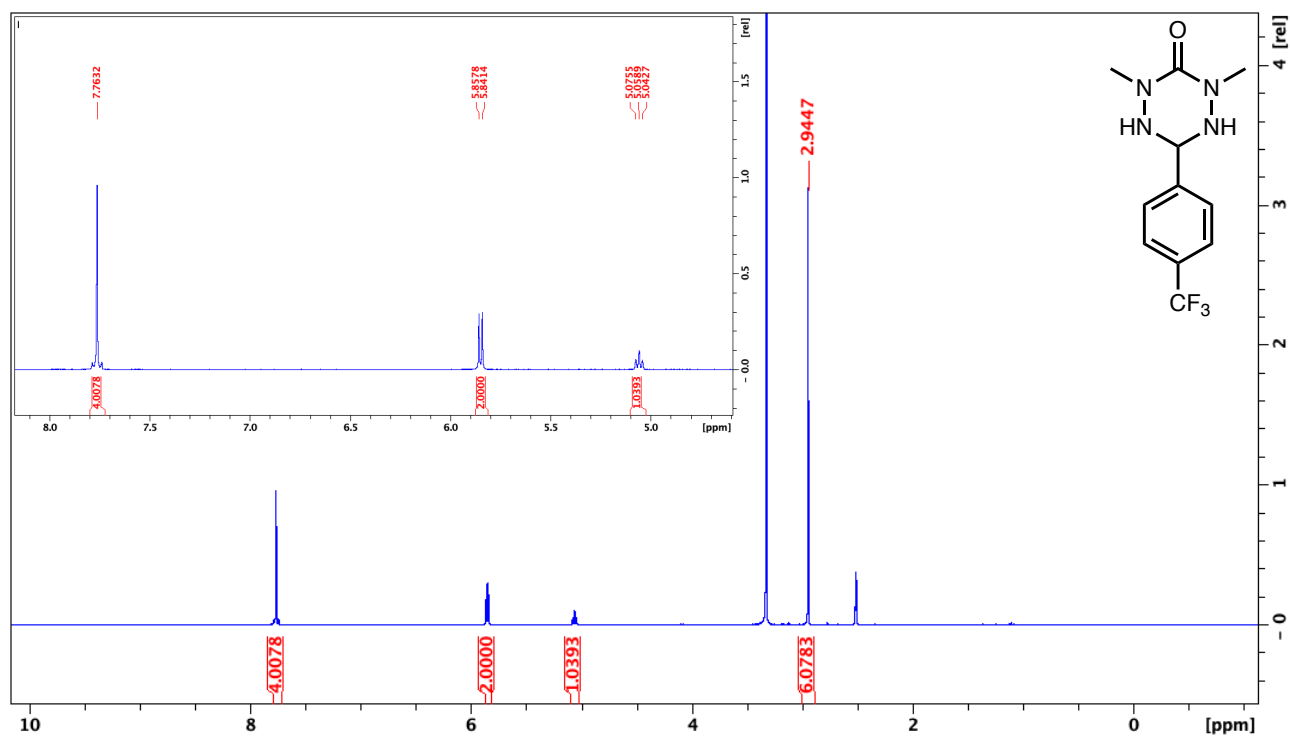Fig. S60:  $^{13}\text{C}$  NMR of **6c**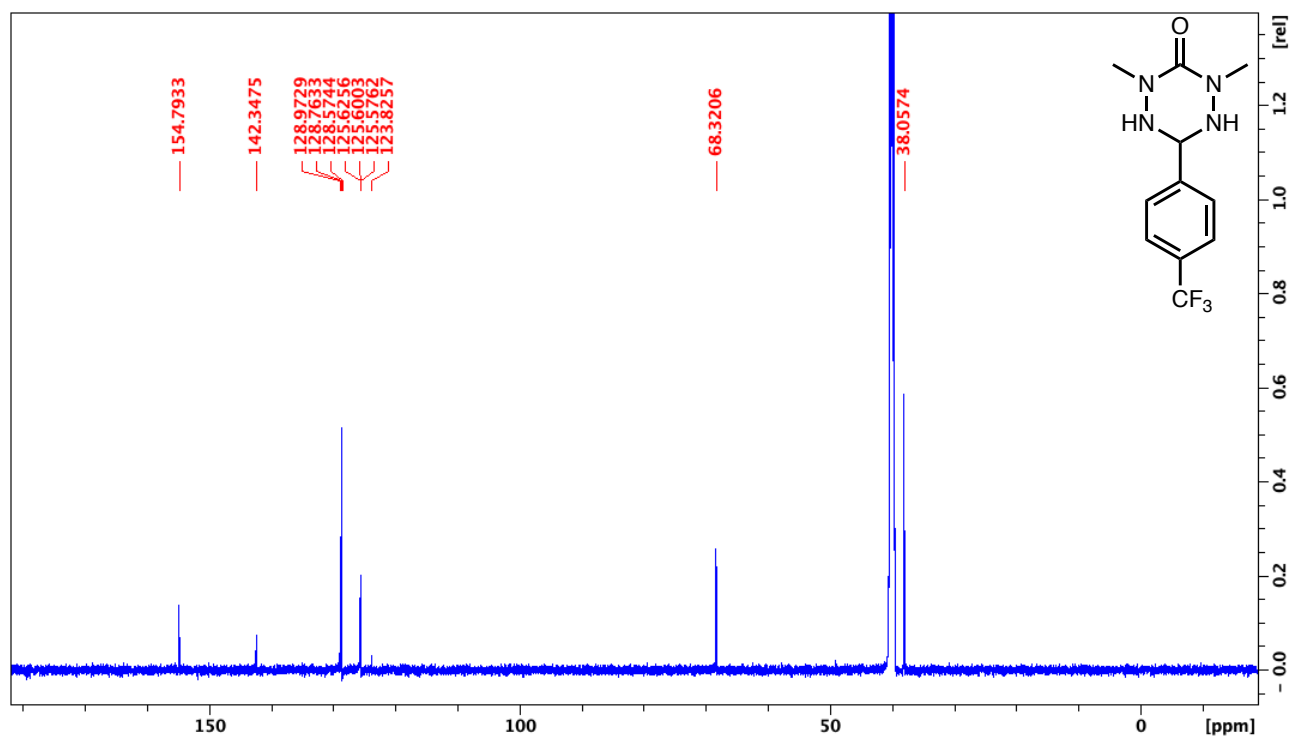

Fig. S61:  $^{19}\text{F}$  NMR of **6c**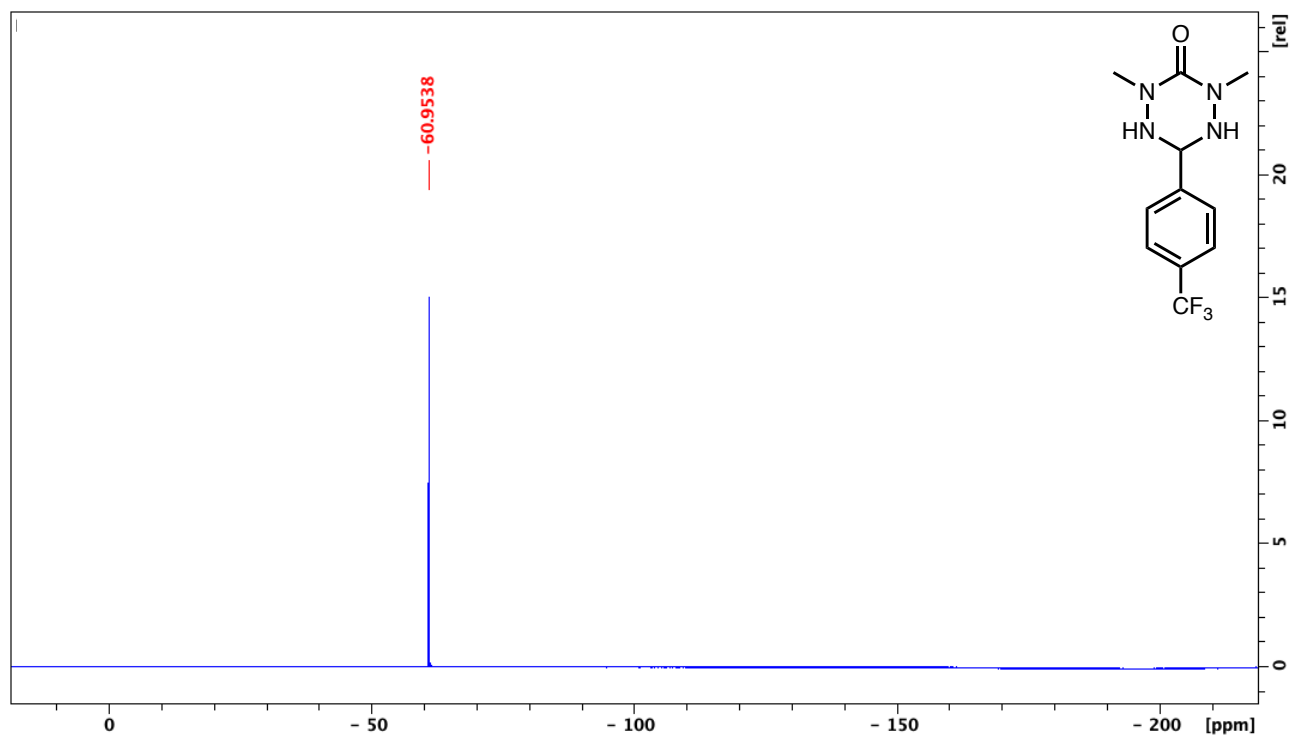Fig. S62:  $^1\text{H}$  NMR of **7a**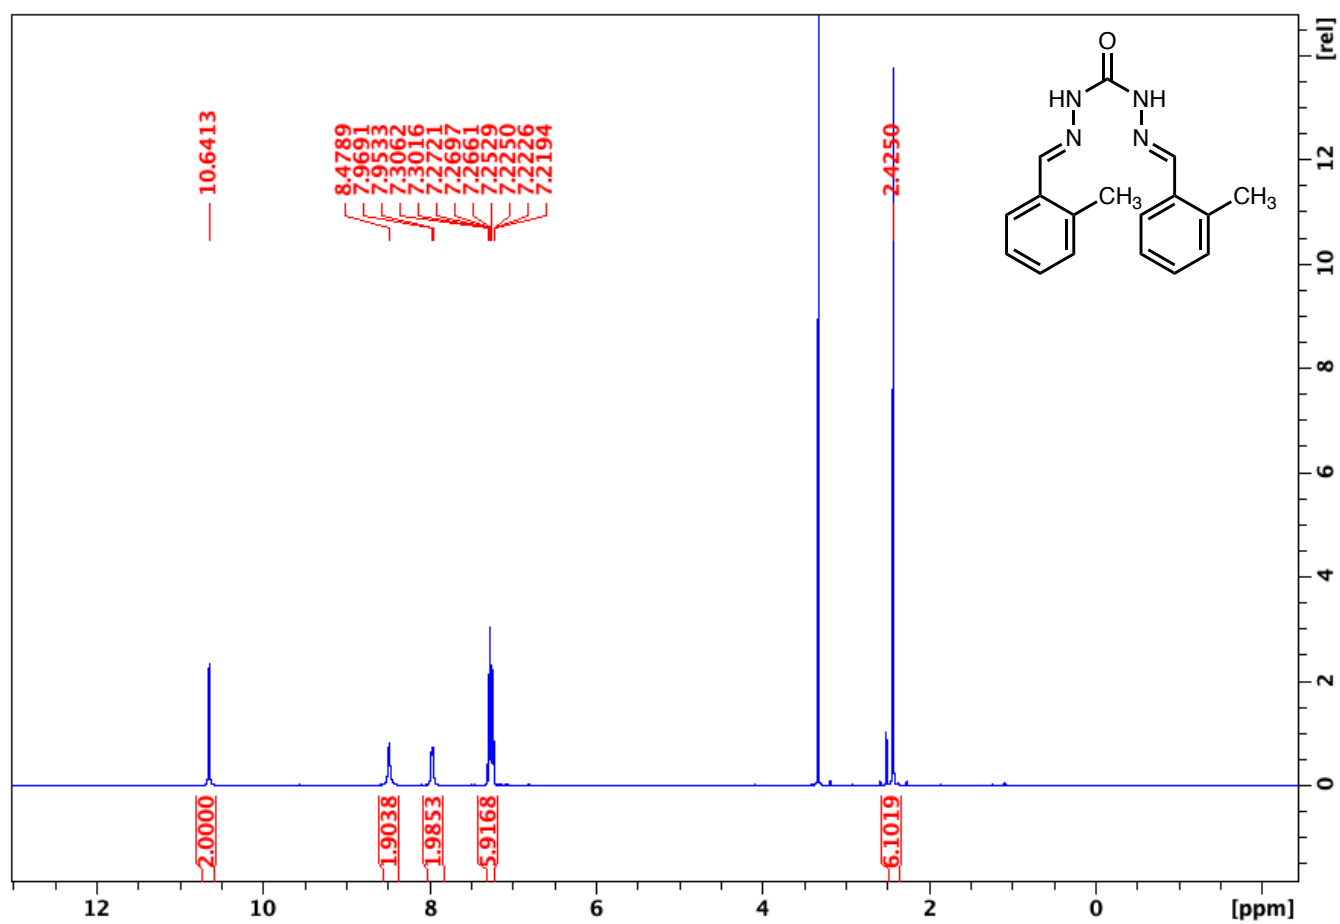

Fig. S63:  $^{13}\text{C}$  NMR of 7a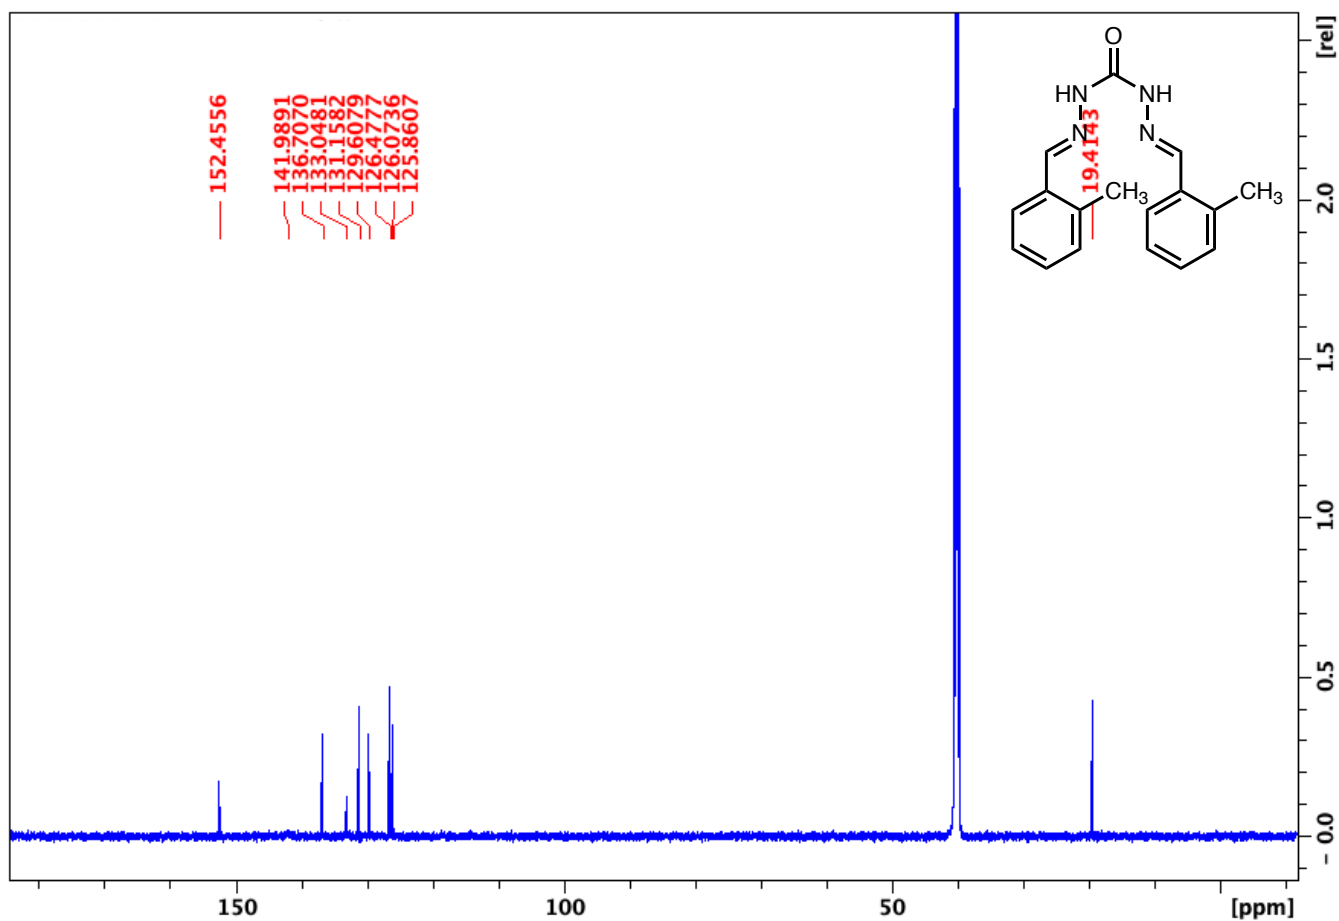Fig. S64:  $^1\text{H}$  NMR of 7b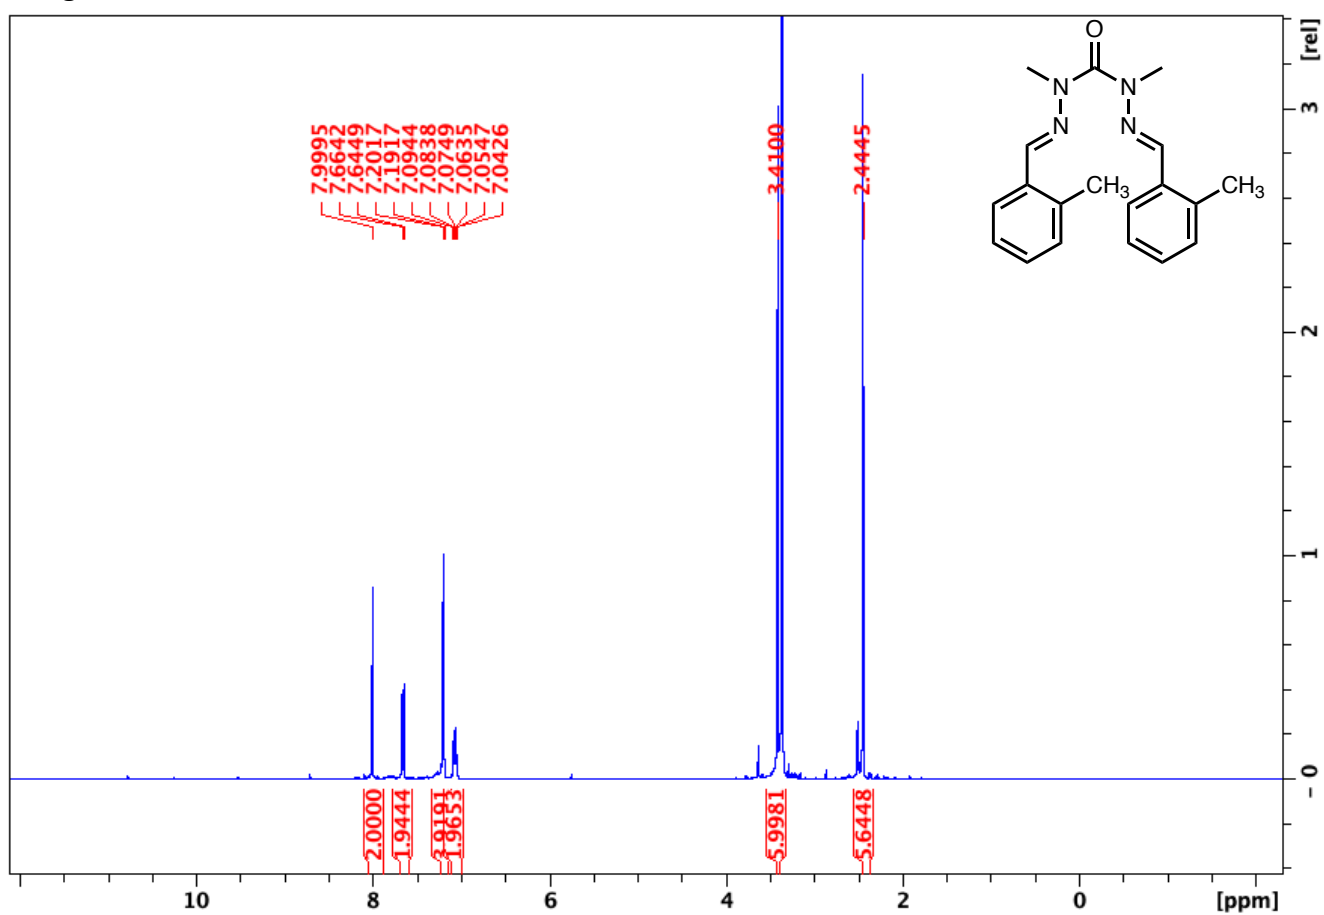

Fig. S65:  $^{13}\text{C}$  NMR of 7b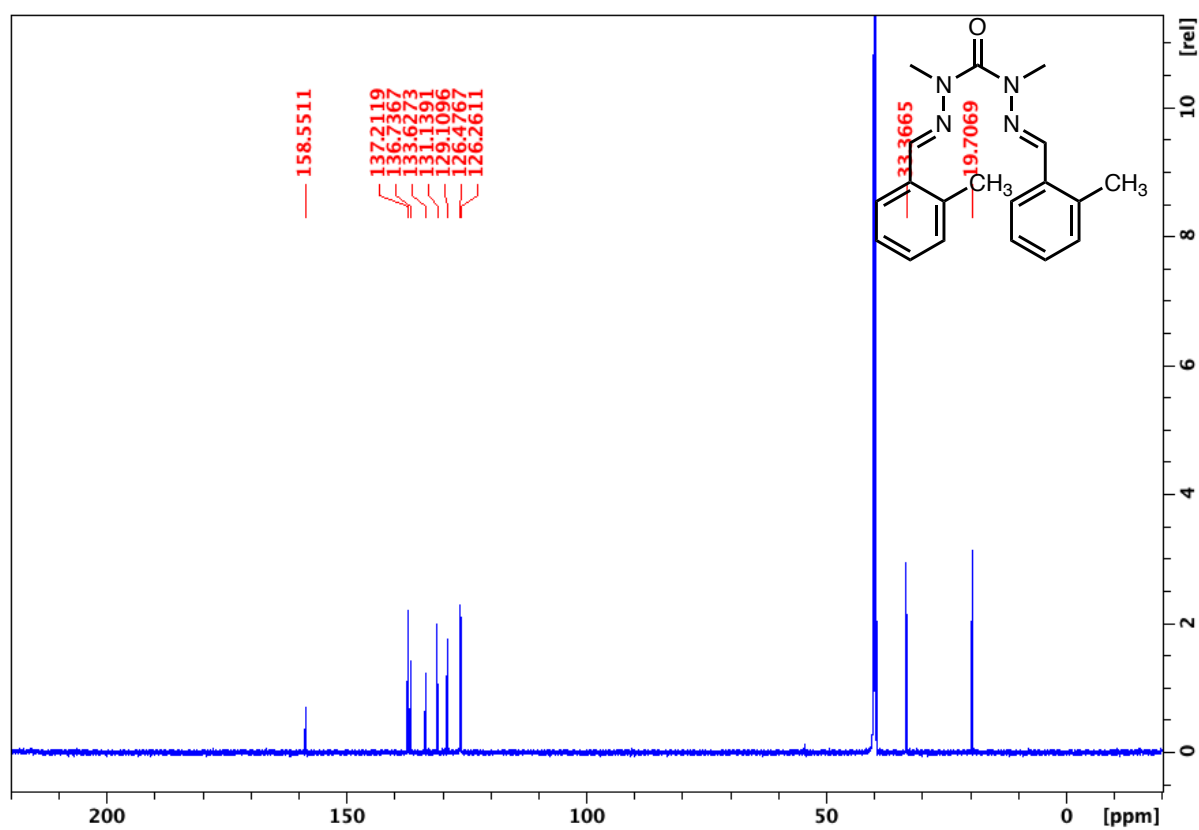Fig. S66:  $^1\text{H}$  NMR of 7c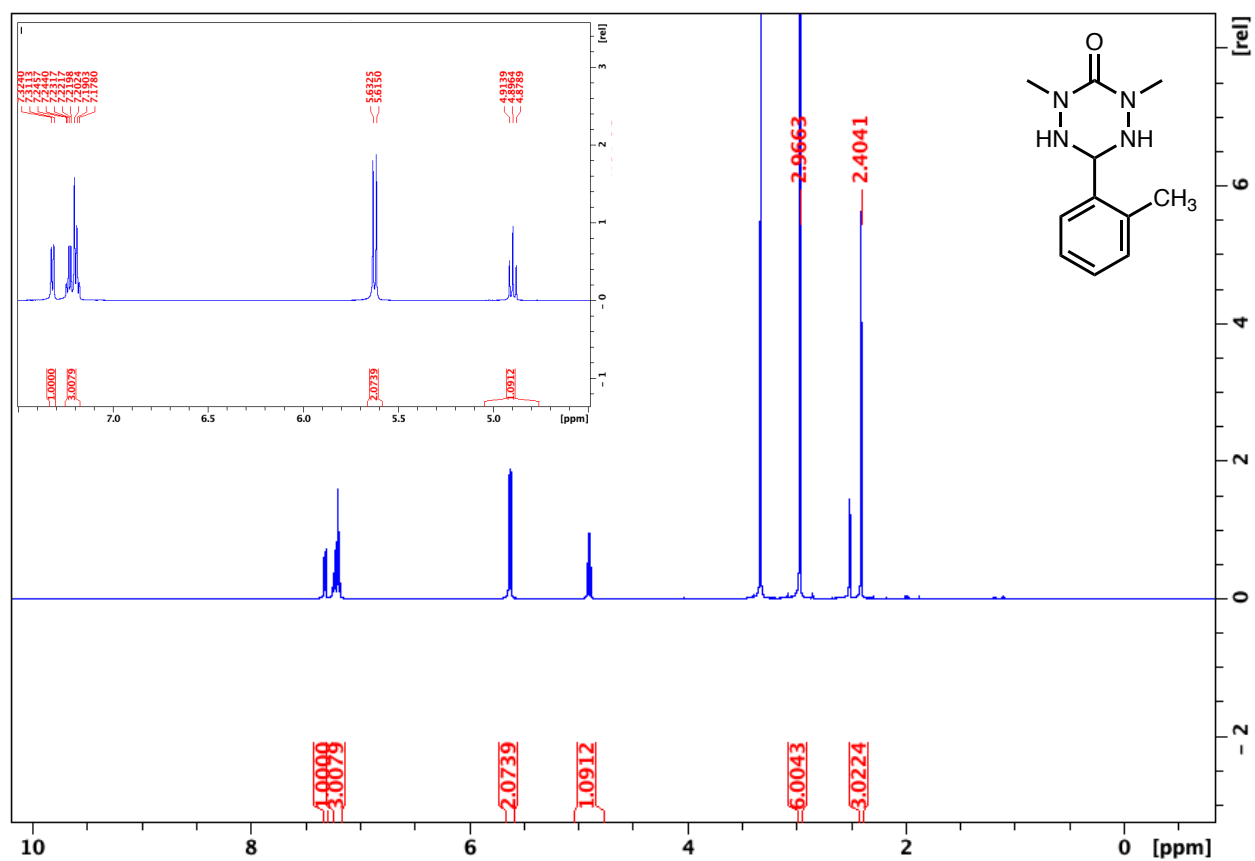

Fig. S67:  $^{13}\text{C}$  NMR of 7c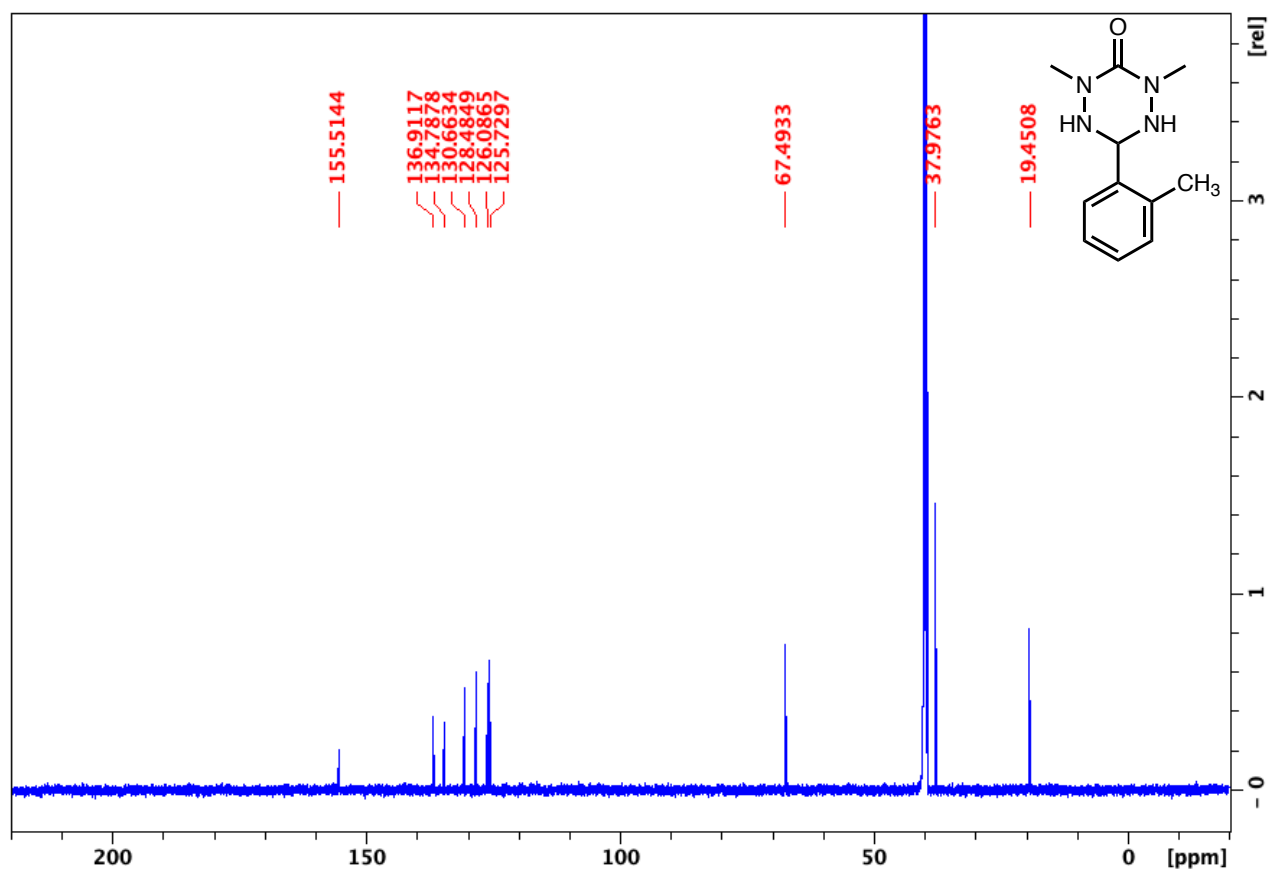Fig. S68:  $^1\text{H}$  NMR of 8a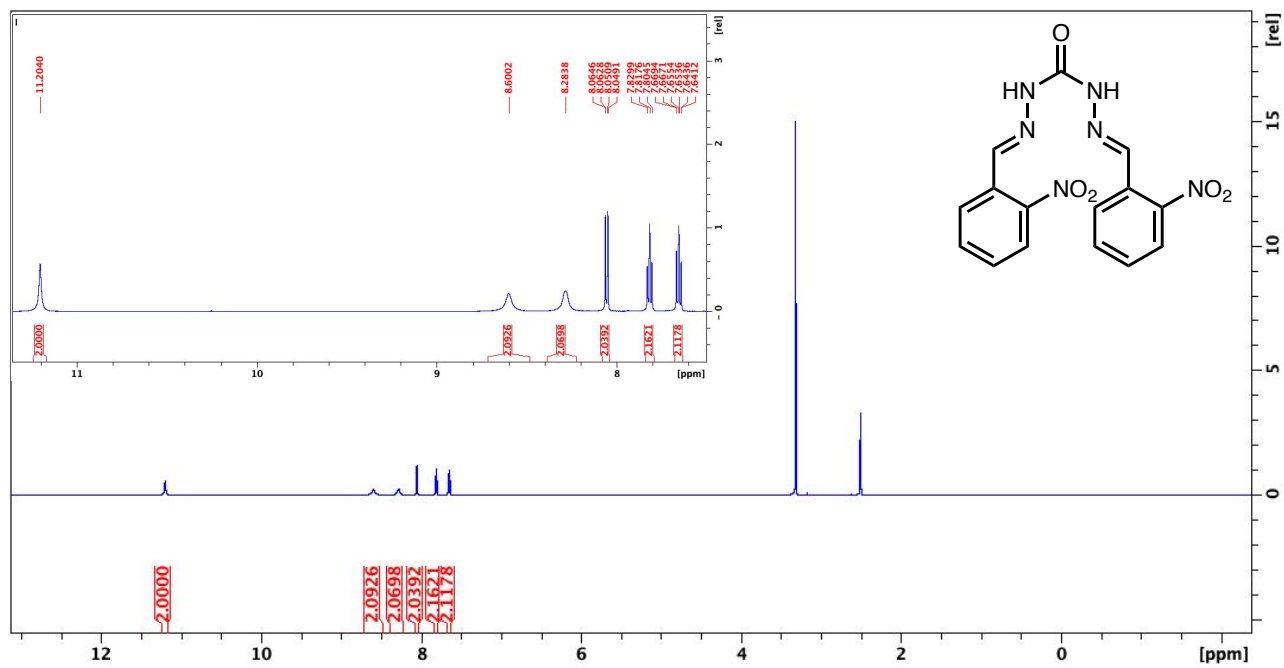

Fig. S69:  $^{13}\text{C}$  NMR of 8a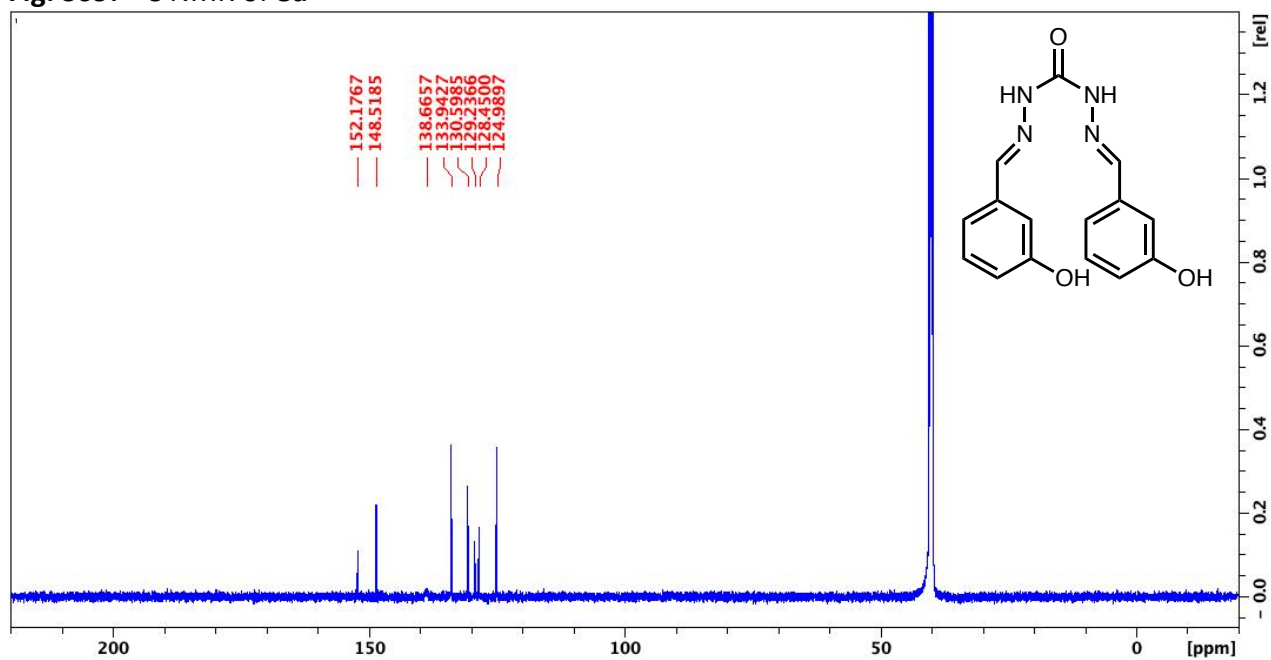Fig. S70:  $^1\text{H}$  NMR of 8b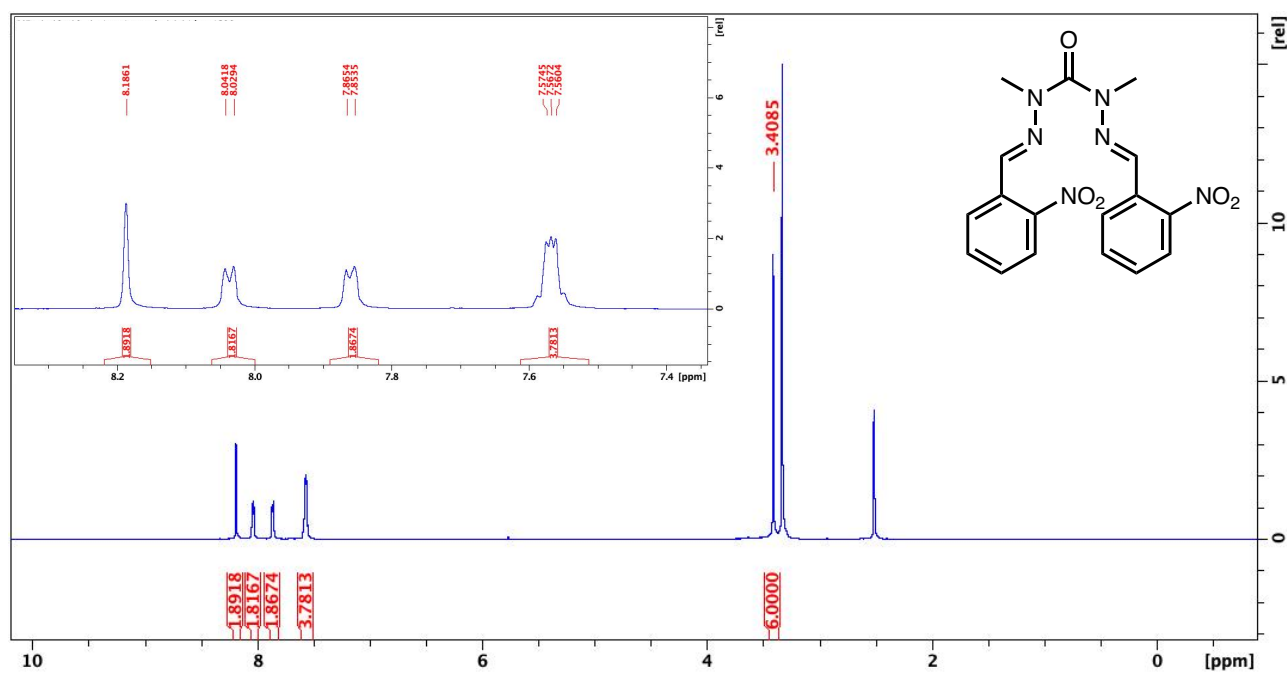



Fig. S71:  $^{13}\text{C}$  NMR of **8b**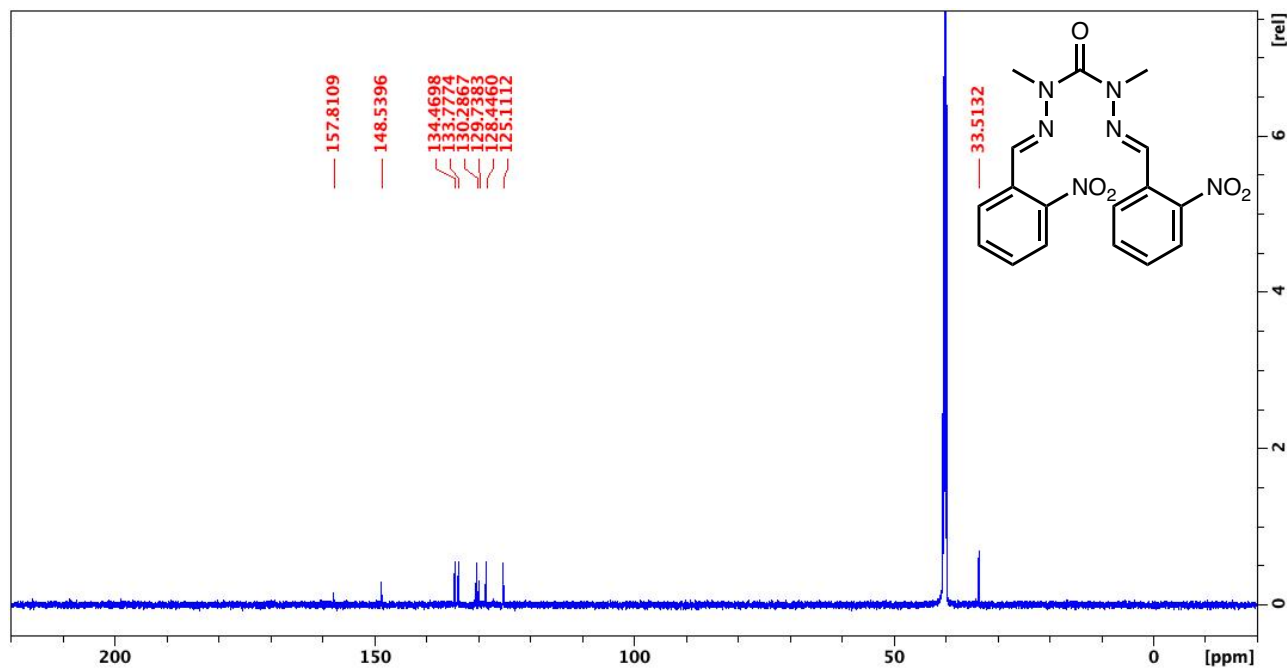Fig. S72:  $^1\text{H}$  NMR of **8c**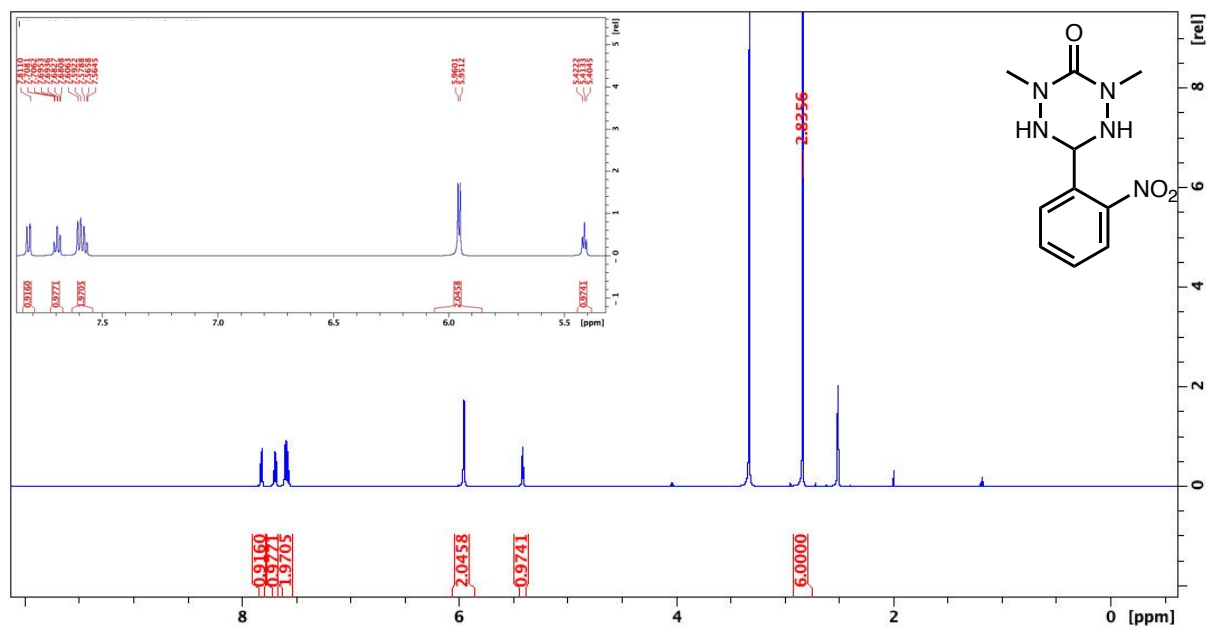

Fig. S73:  $^{13}\text{C}$  NMR of **8c**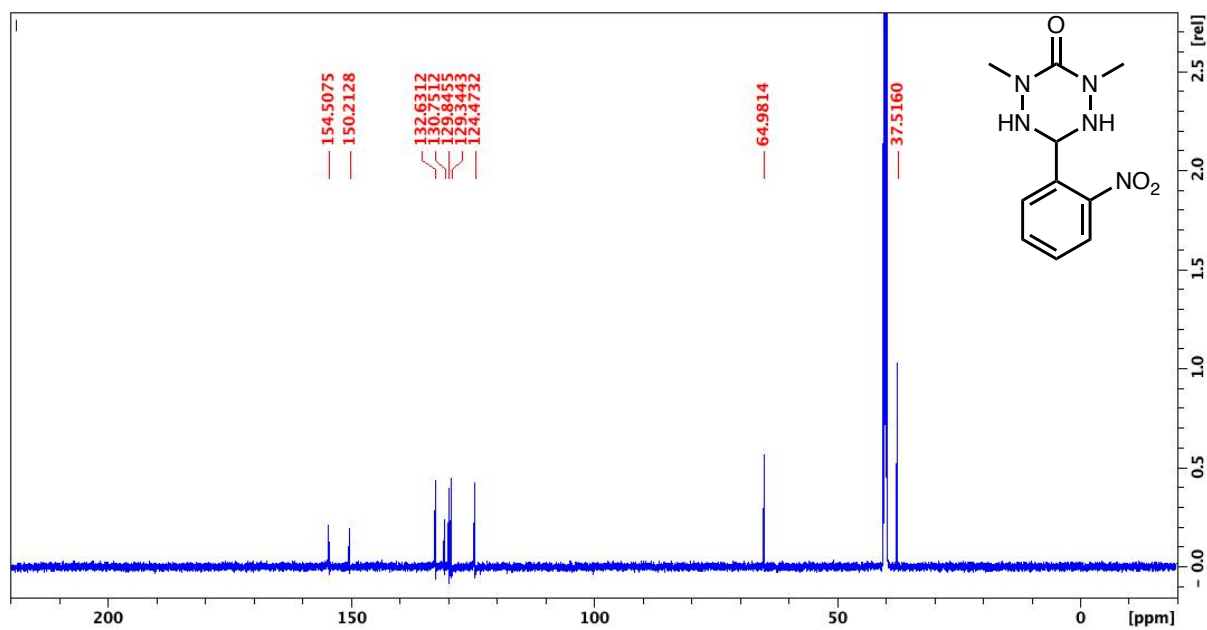Fig. S74:  $^1\text{H}$  NMR of **9a**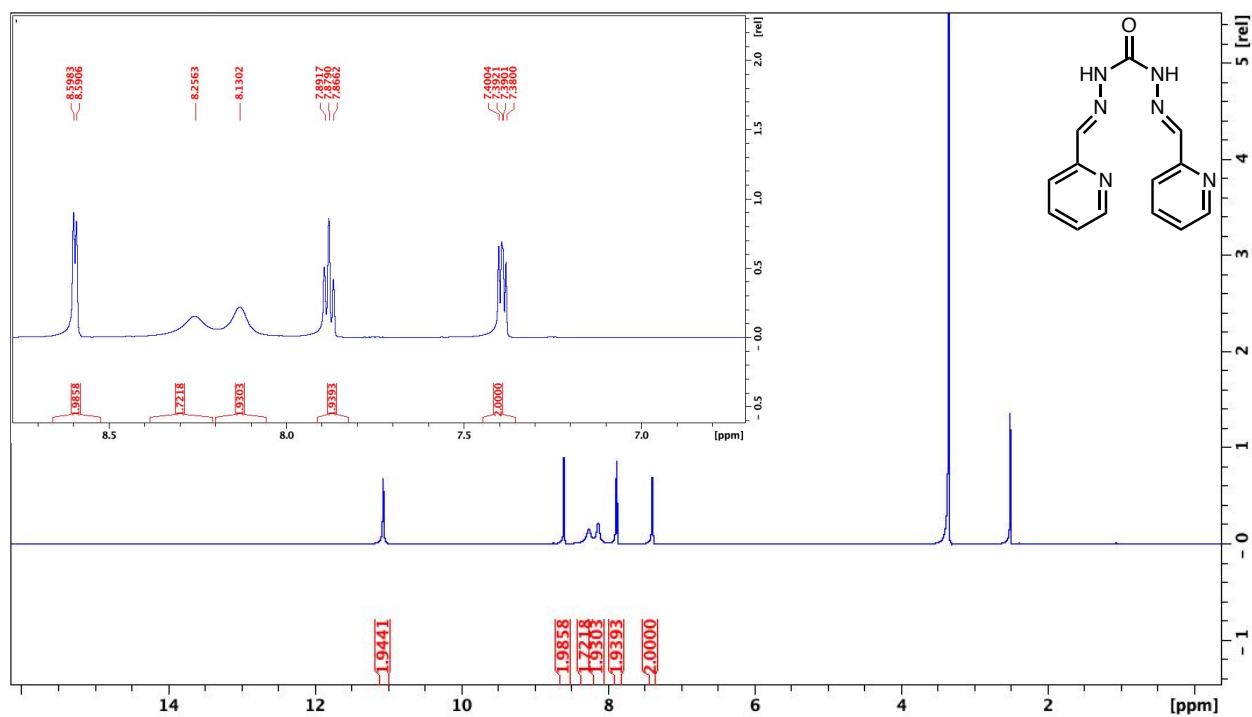

Fig. S75:  $^{13}\text{C}$  NMR of 9a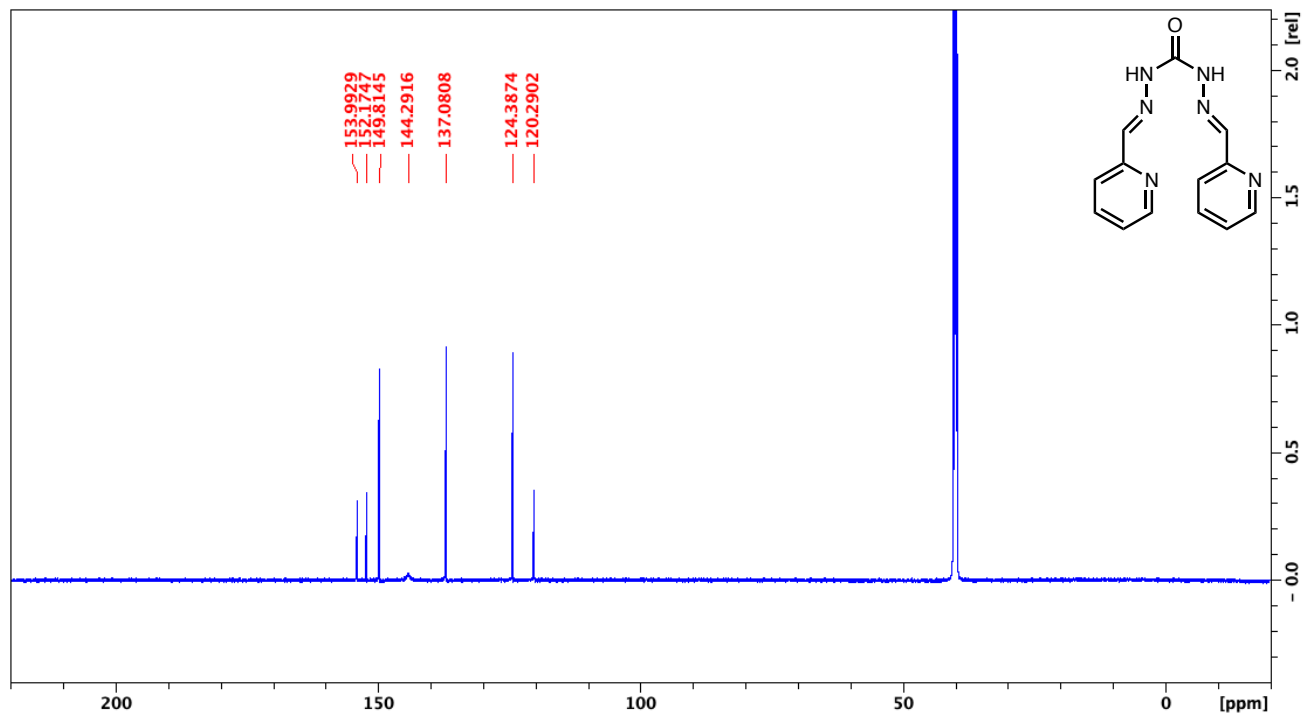Fig. S76:  $^1\text{H}$  NMR of 9b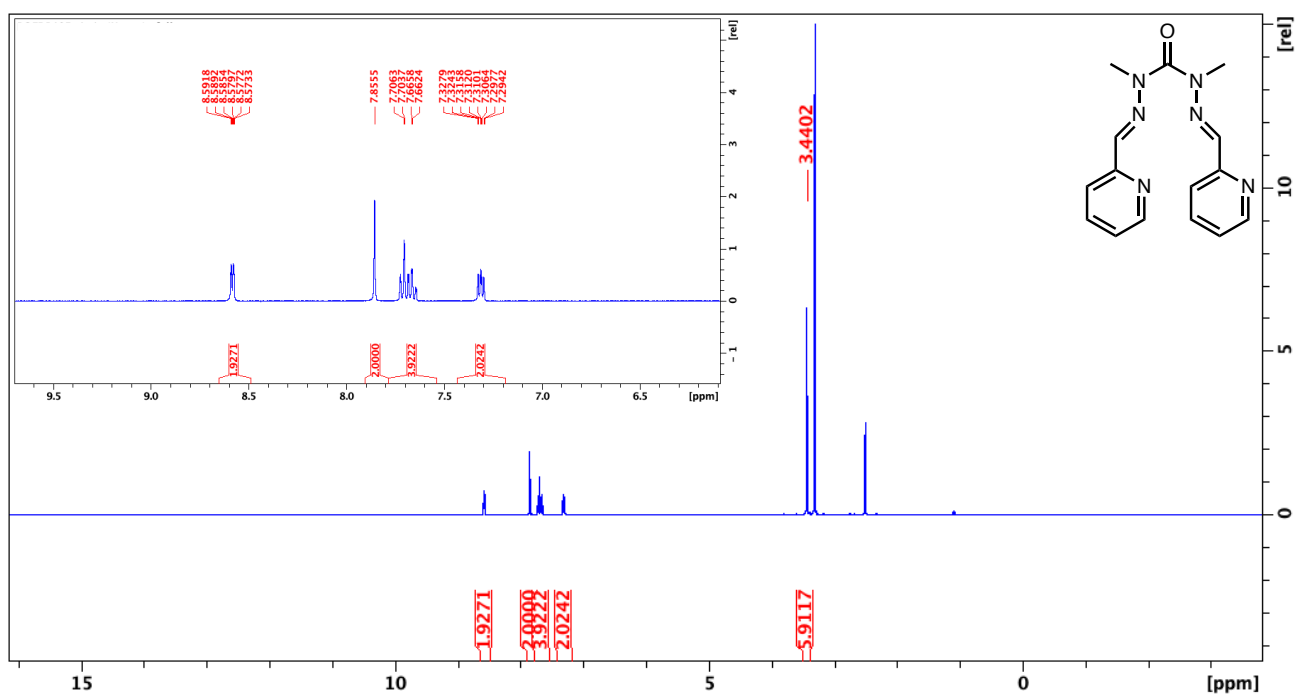

Fig. S77:  $^{13}\text{C}$  NMR of **9b**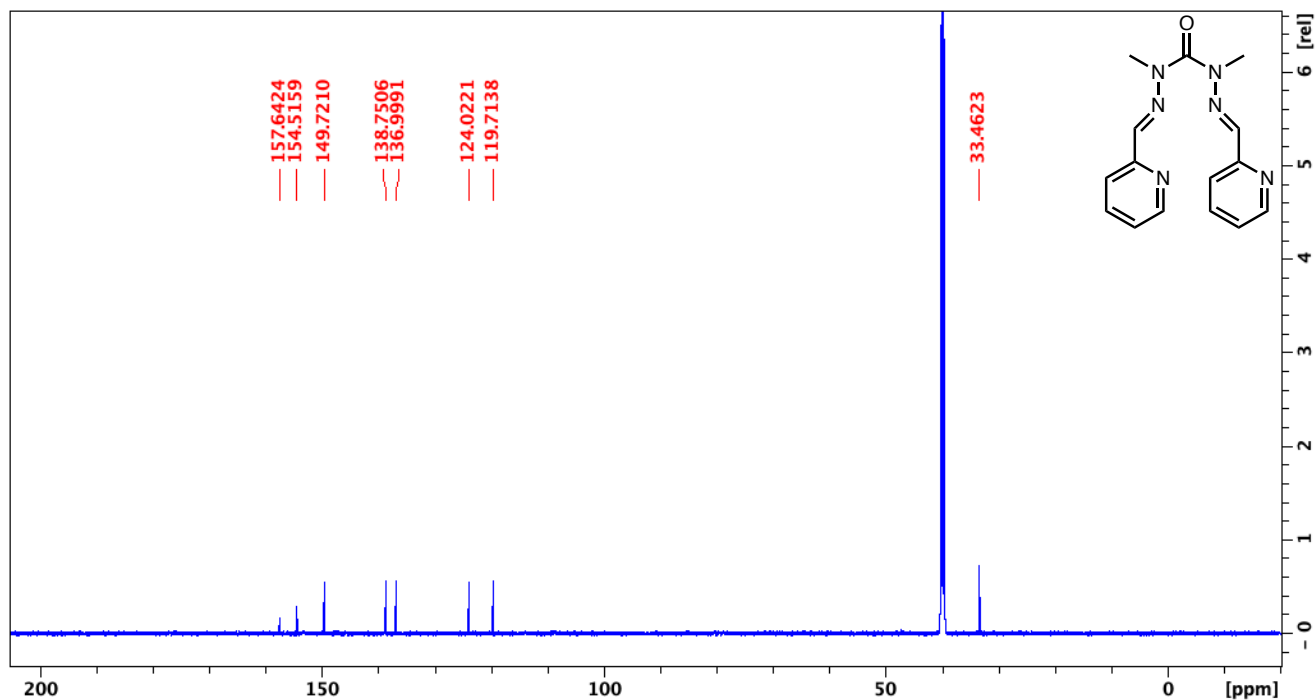Fig. S78:  $^1\text{H}$  NMR of **9b** decomposition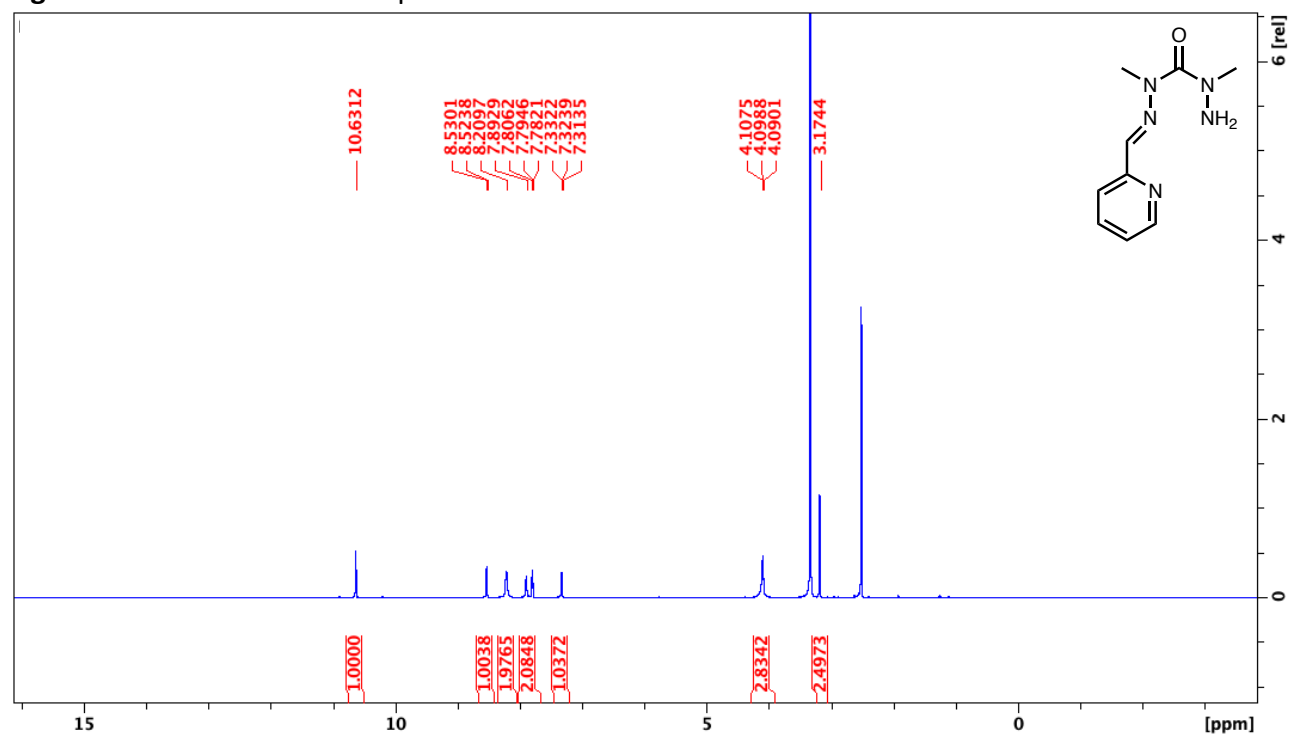

Fig. S79:  $^{13}\text{C}$  NMR of **9b** decomposition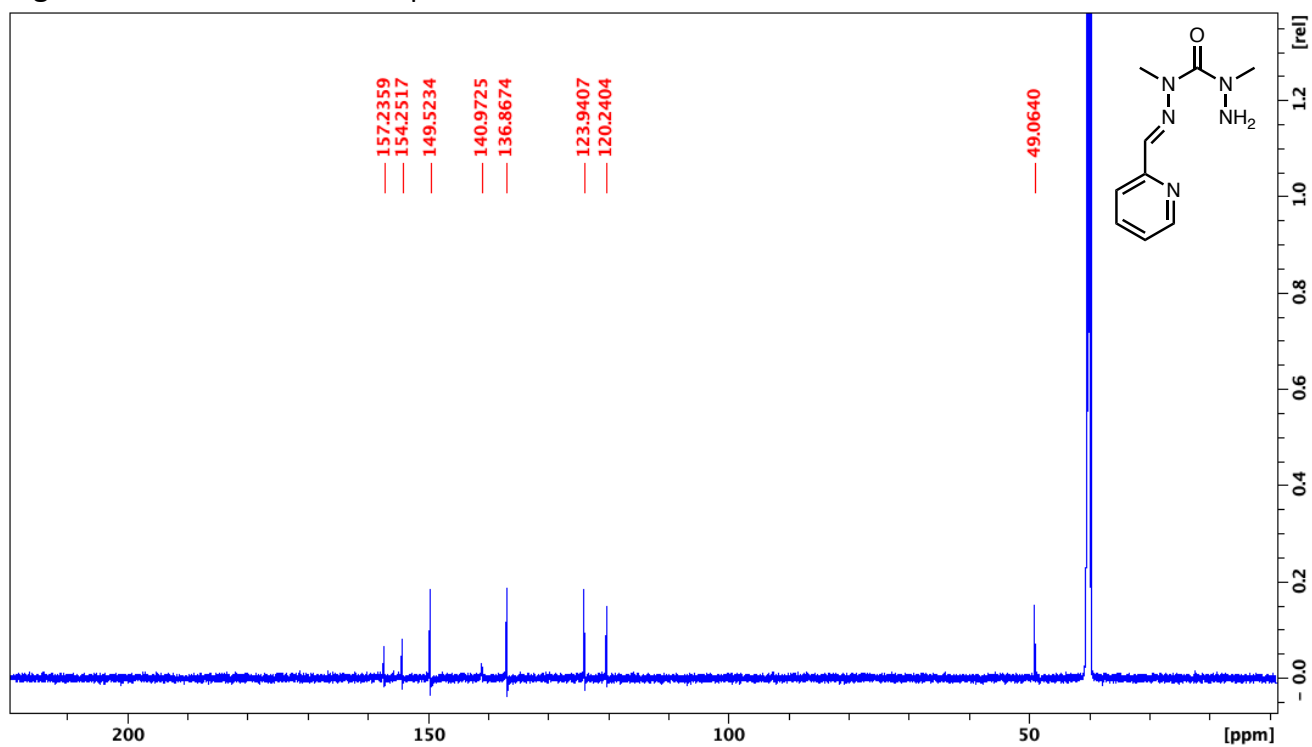Fig. S80:  $^1\text{H}$  NMR of **9c**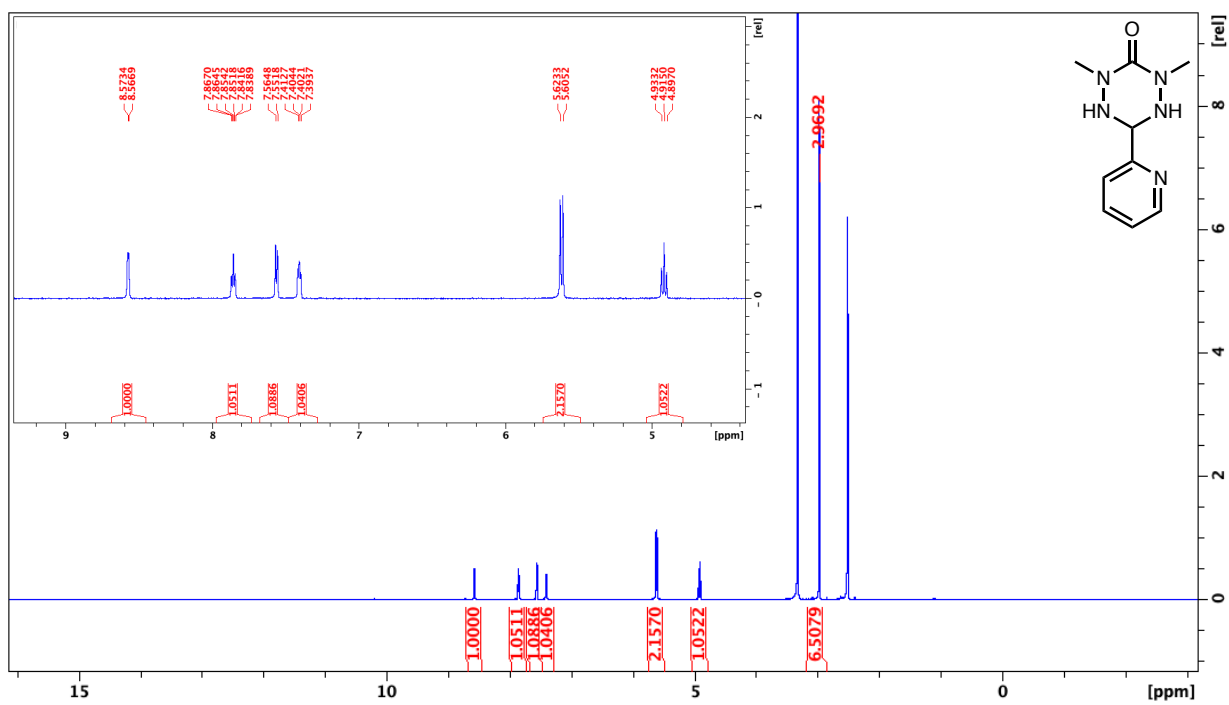

Fig. S81:  $^{13}\text{C}$  NMR of **9c**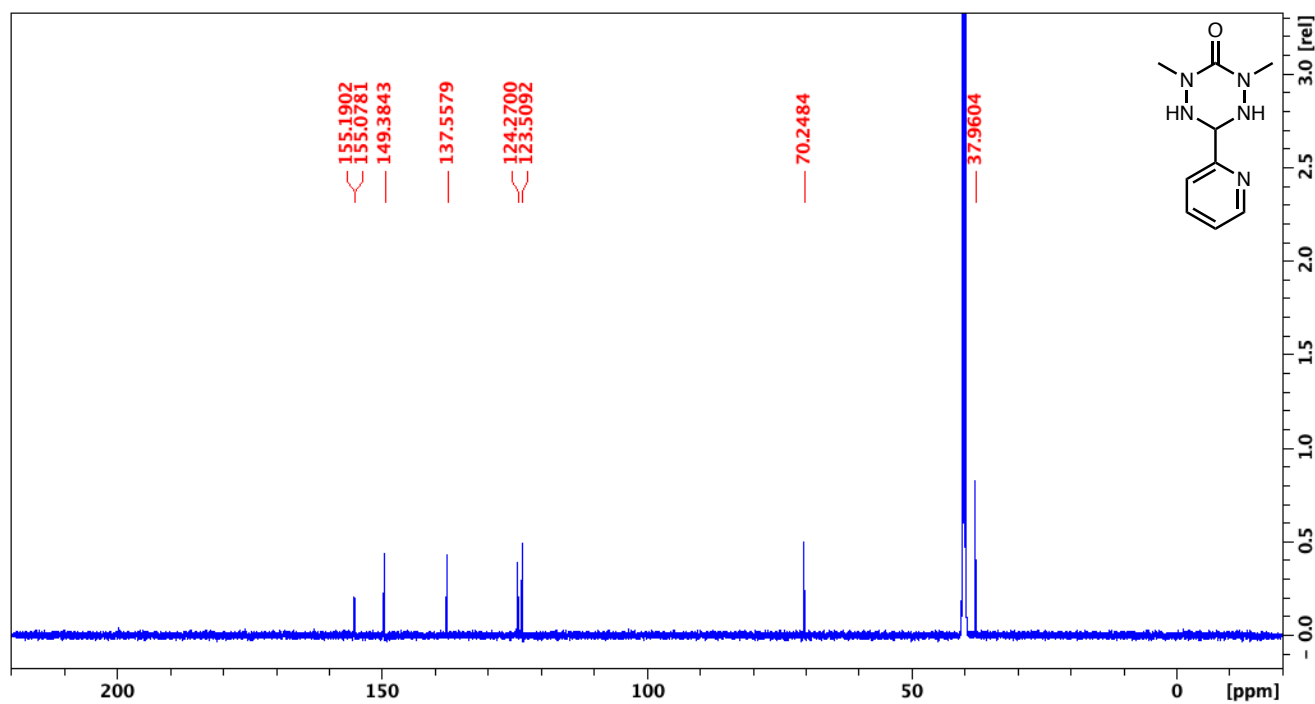Fig. S82:  $^1\text{H}$  NMR of **10a**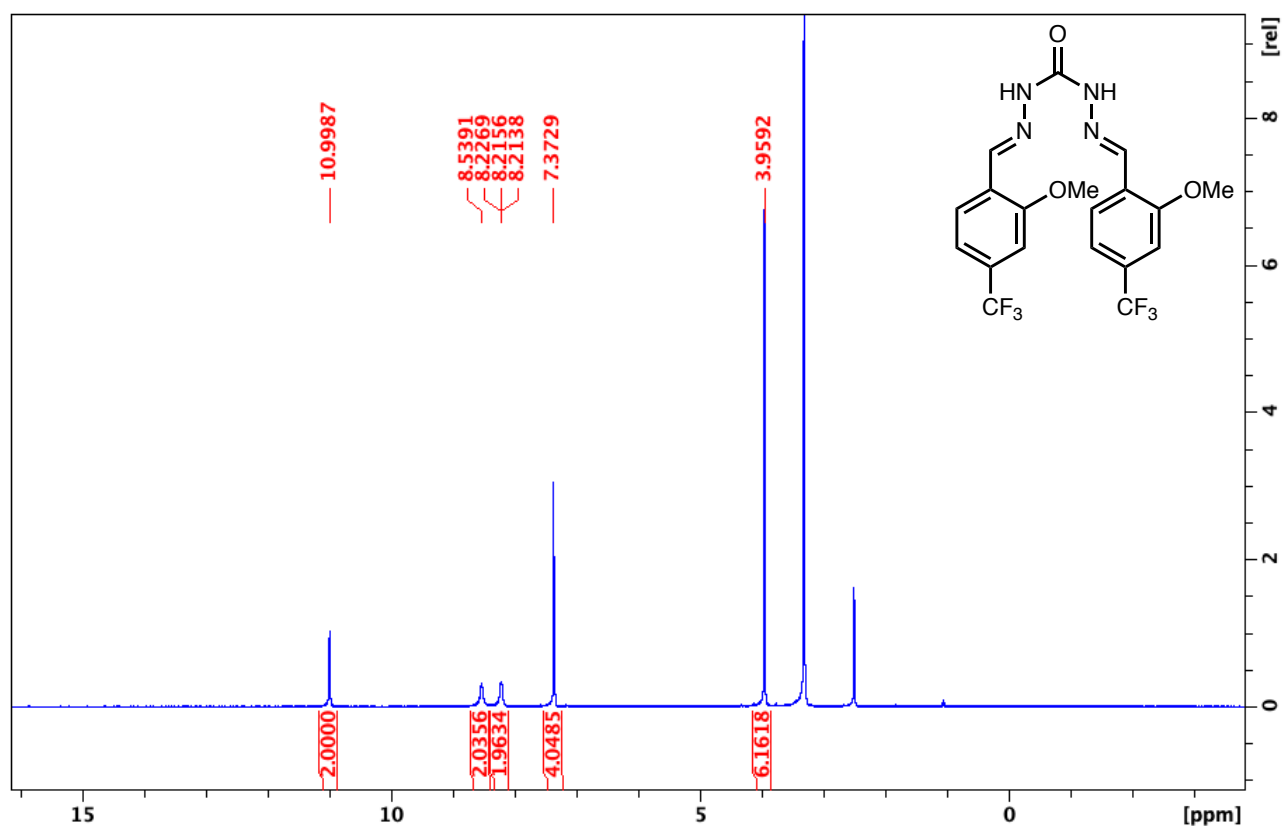

Fig. S83:  $^{13}\text{C}$  NMR of 10a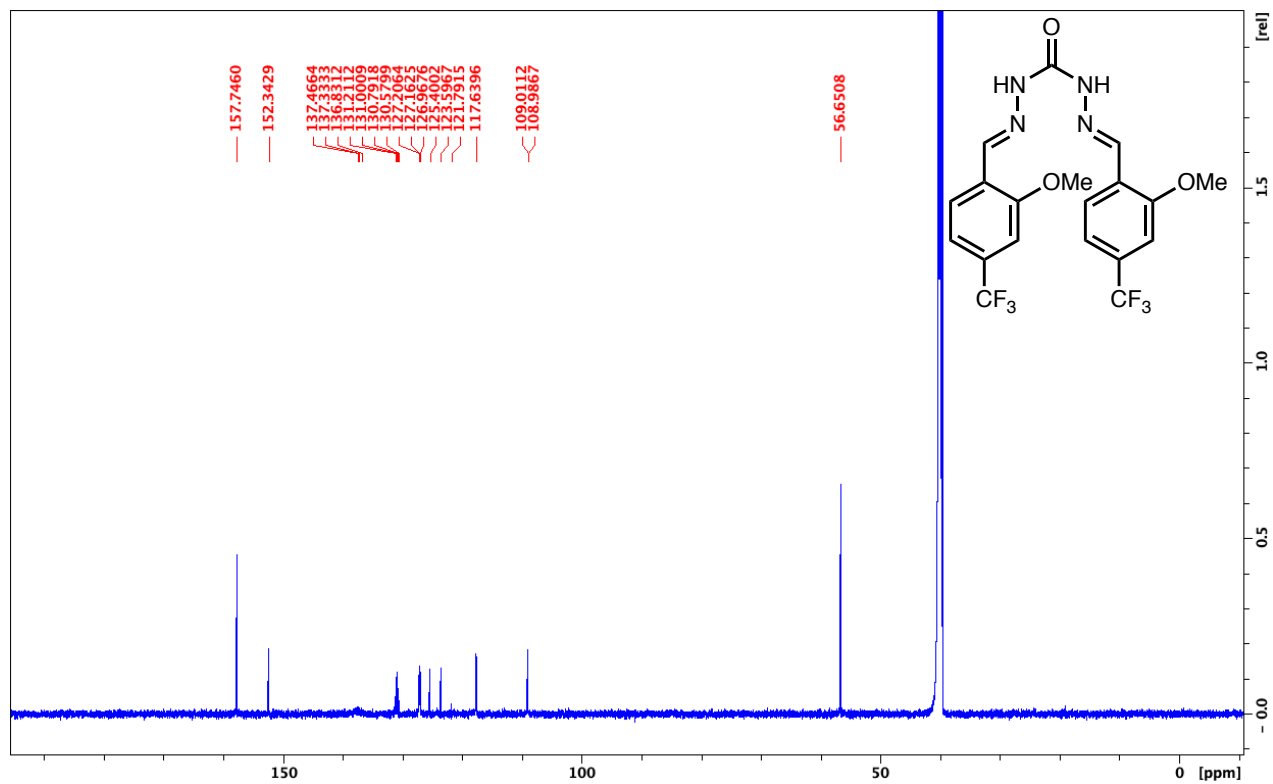Fig. S84:  $^{19}\text{F}$  NMR of 10a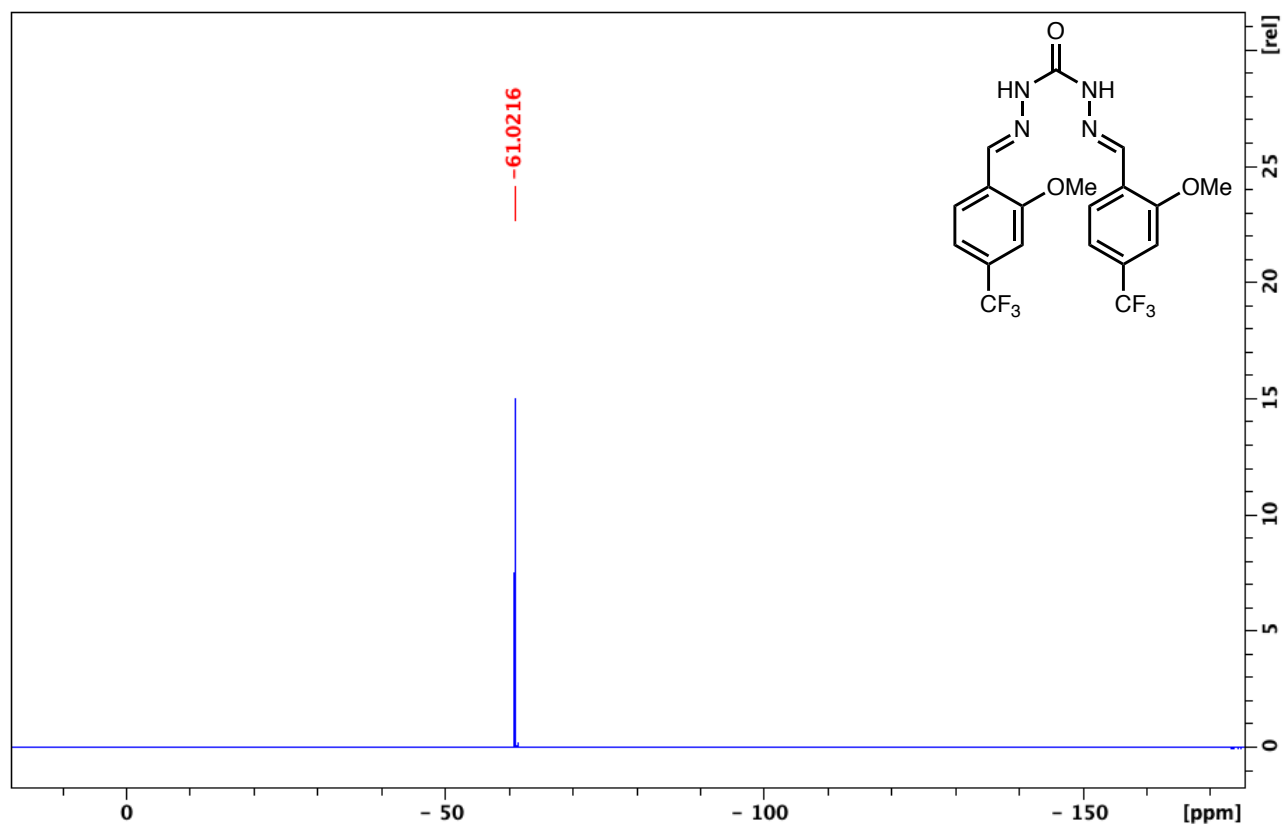

Fig. S85:  $^1\text{H}$  NMR of **10b**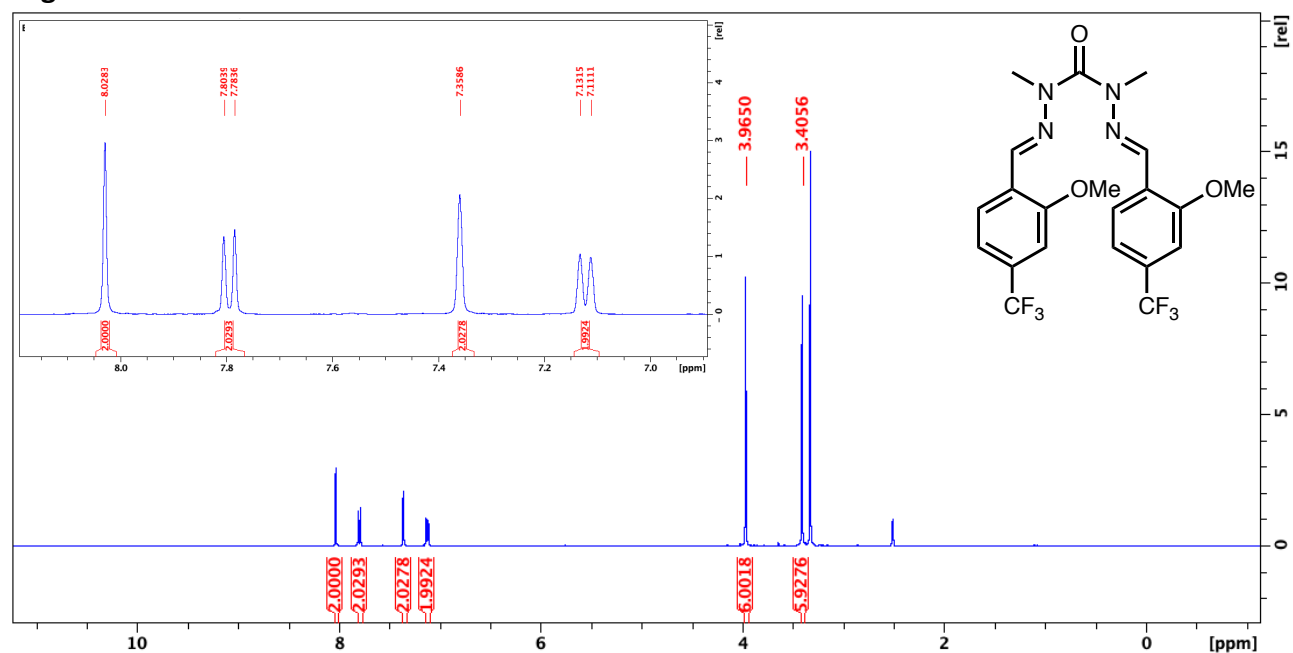Fig. S86:  $^{13}\text{C}$  NMR of **10b**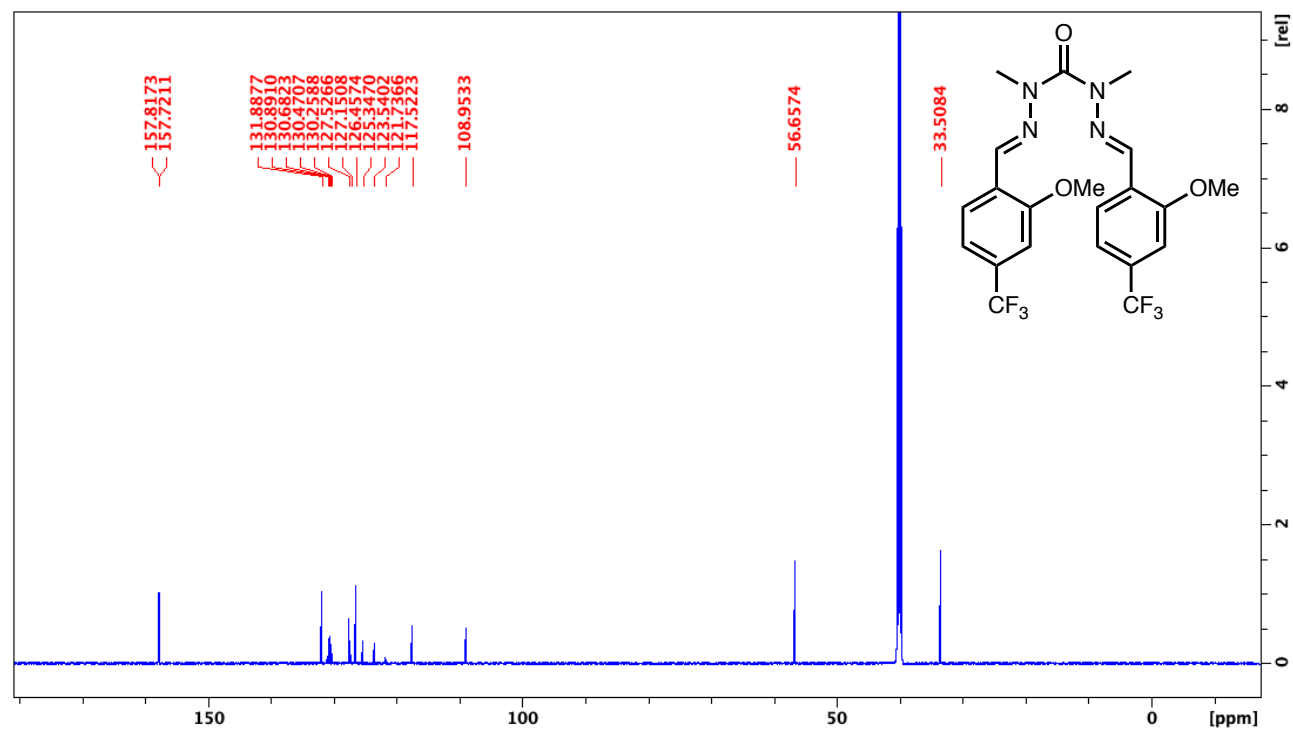



Fig. S87:  $^{19}\text{F}$  NMR of 10b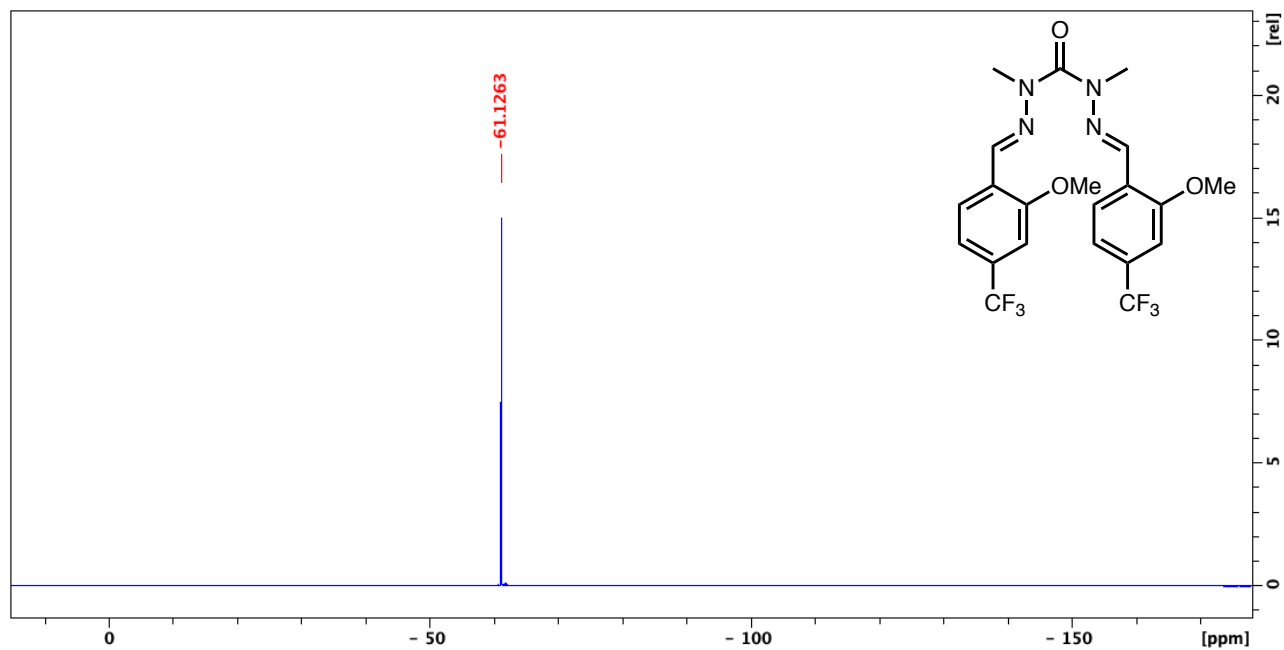Fig. S88:  $^1\text{H}$  NMR of 10c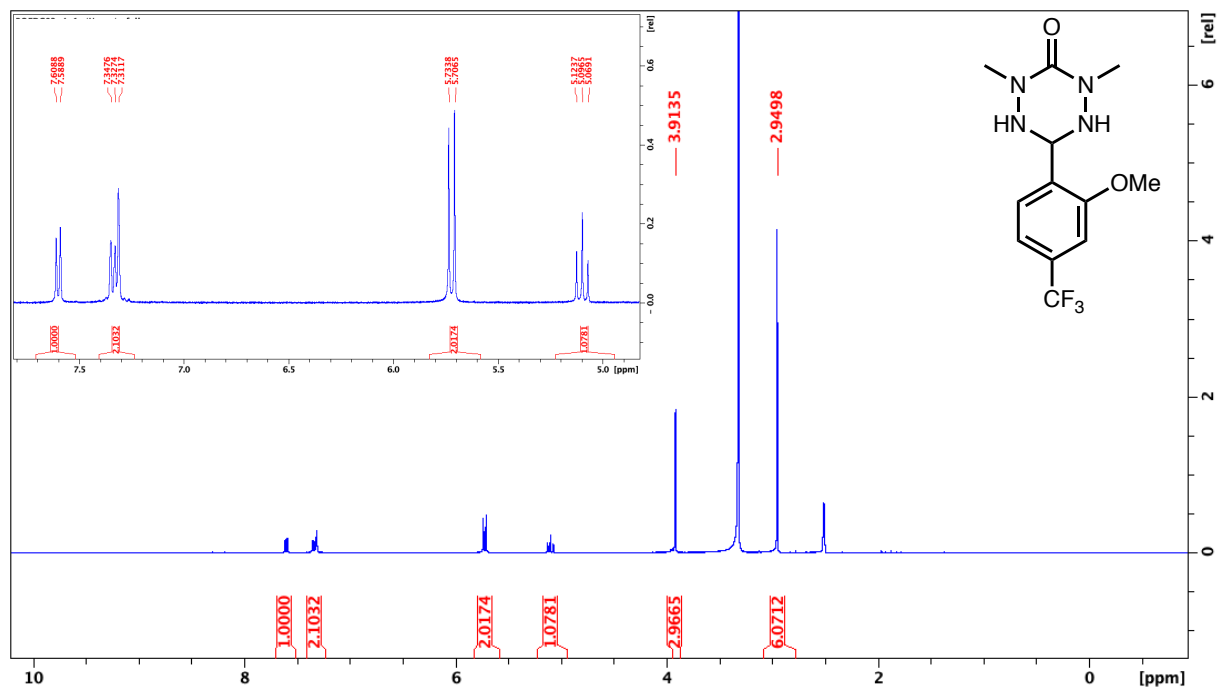

Fig. S89:  $^{13}\text{C}$  NMR of 10c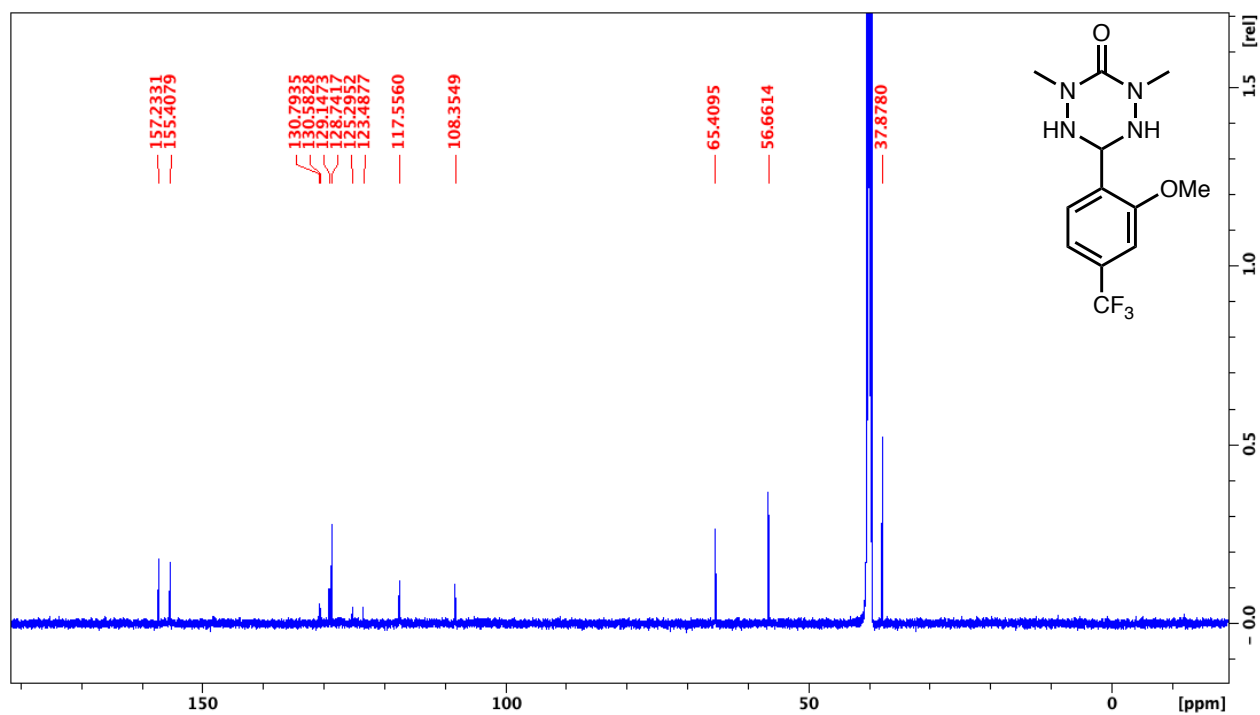Fig. S90:  $^{19}\text{F}$  NMR of 10c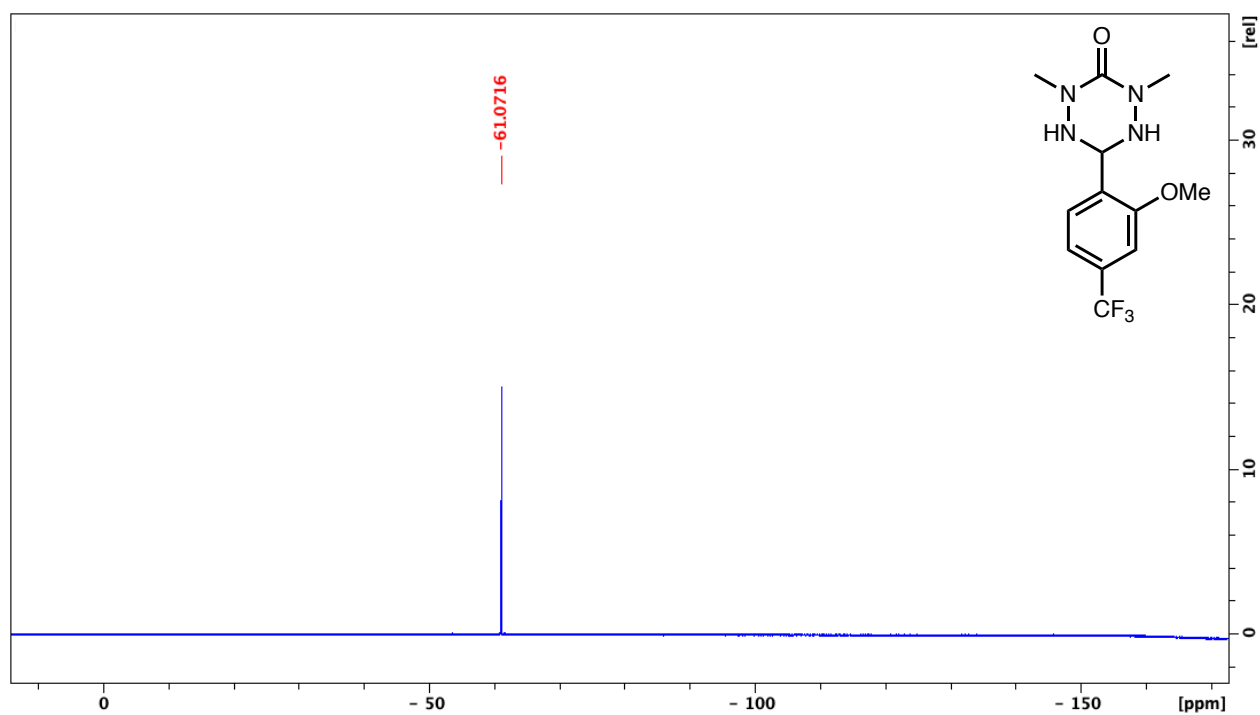

Fig. S91:  $^1\text{H}$  NMR of 11a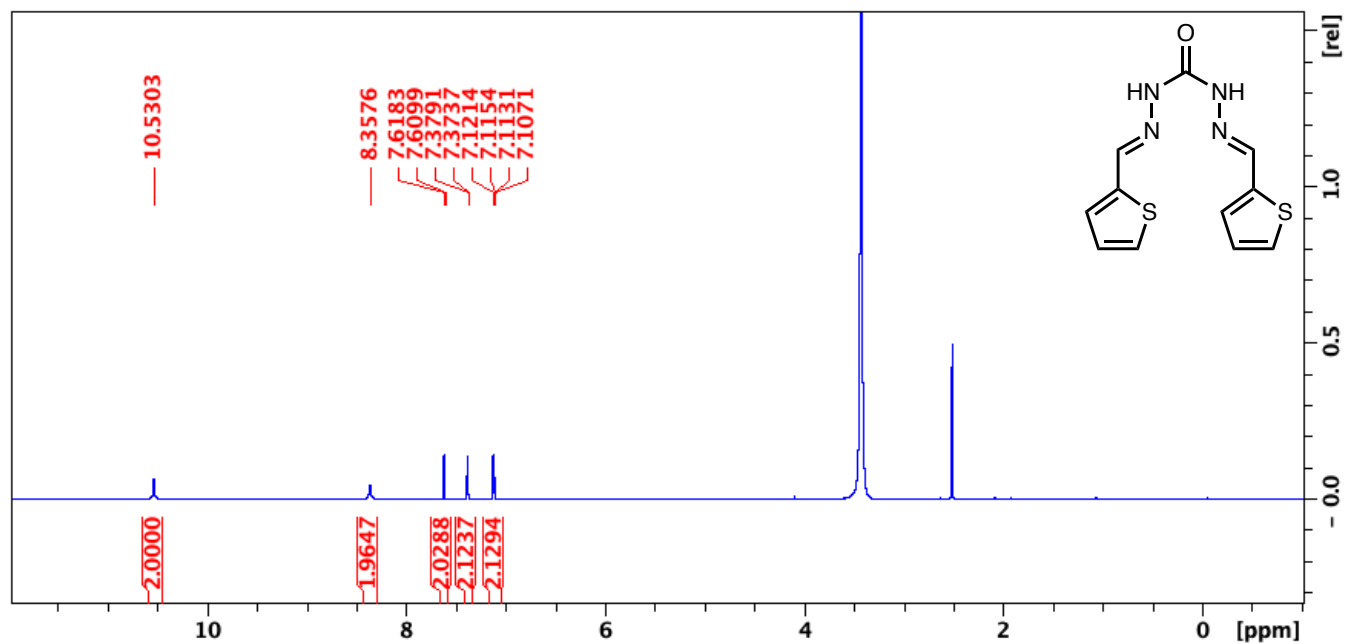Fig. S92:  $^{13}\text{C}$  NMR of 11a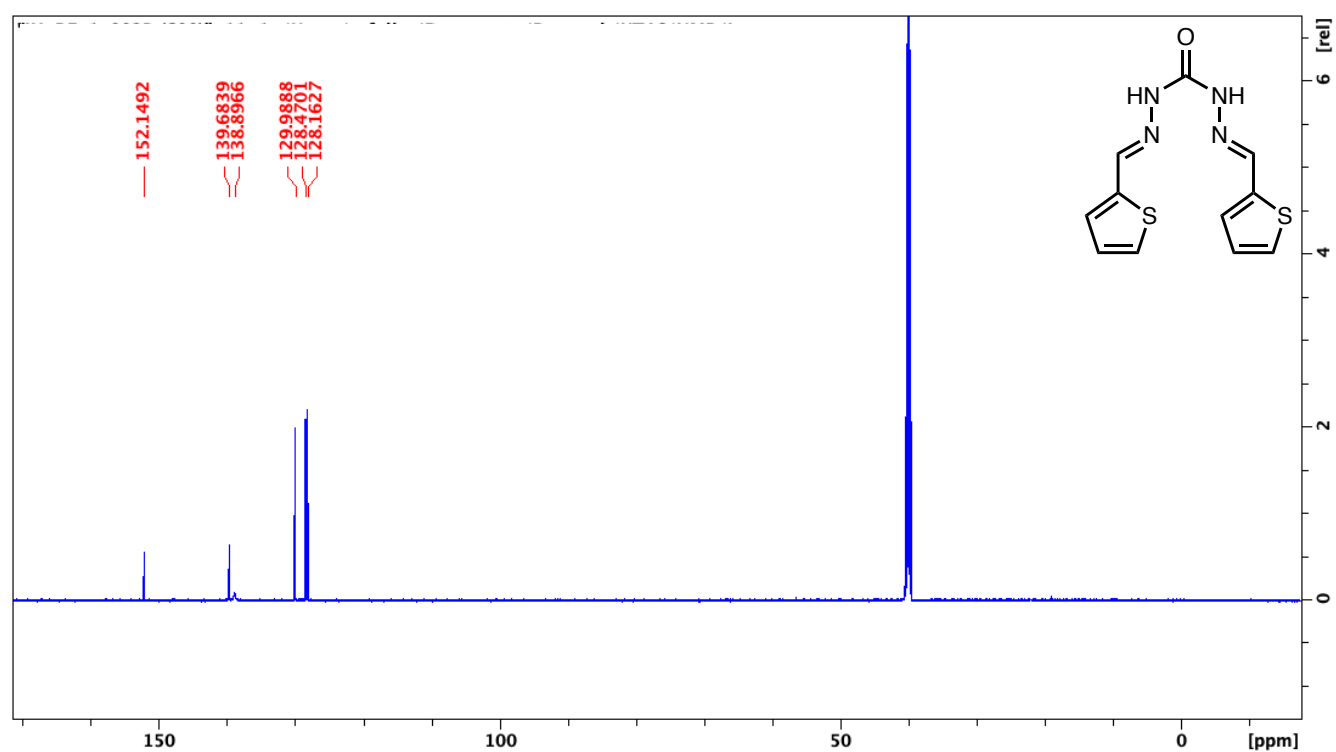

Fig. S93:  $^1\text{H}$  NMR of **11b**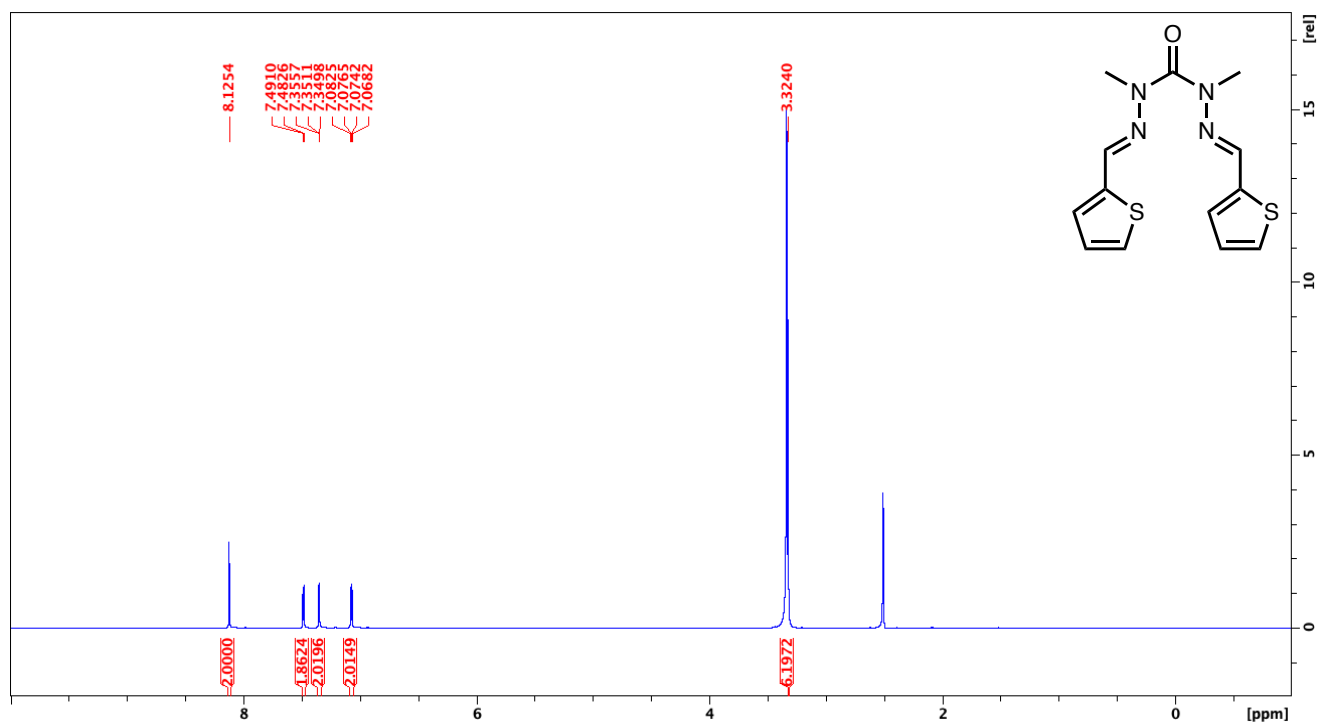Fig. S94:  $^{13}\text{C}$  NMR of **11b**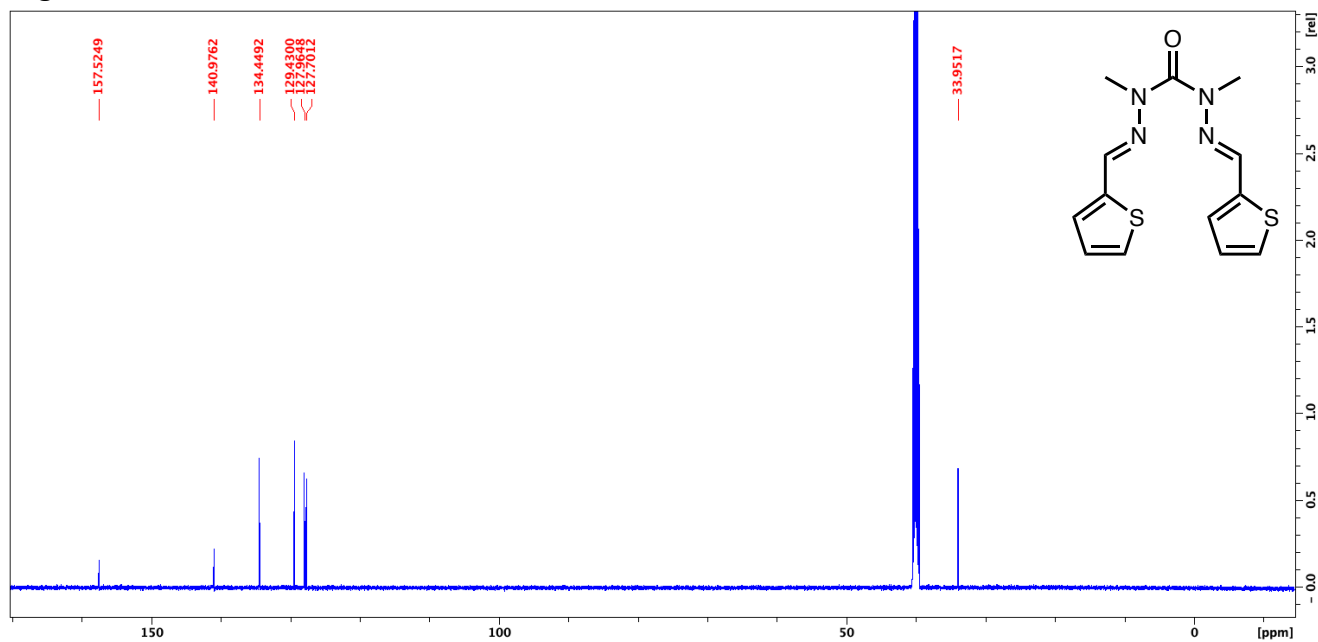

Fig. S95:  $^1\text{H}$  NMR of **11c**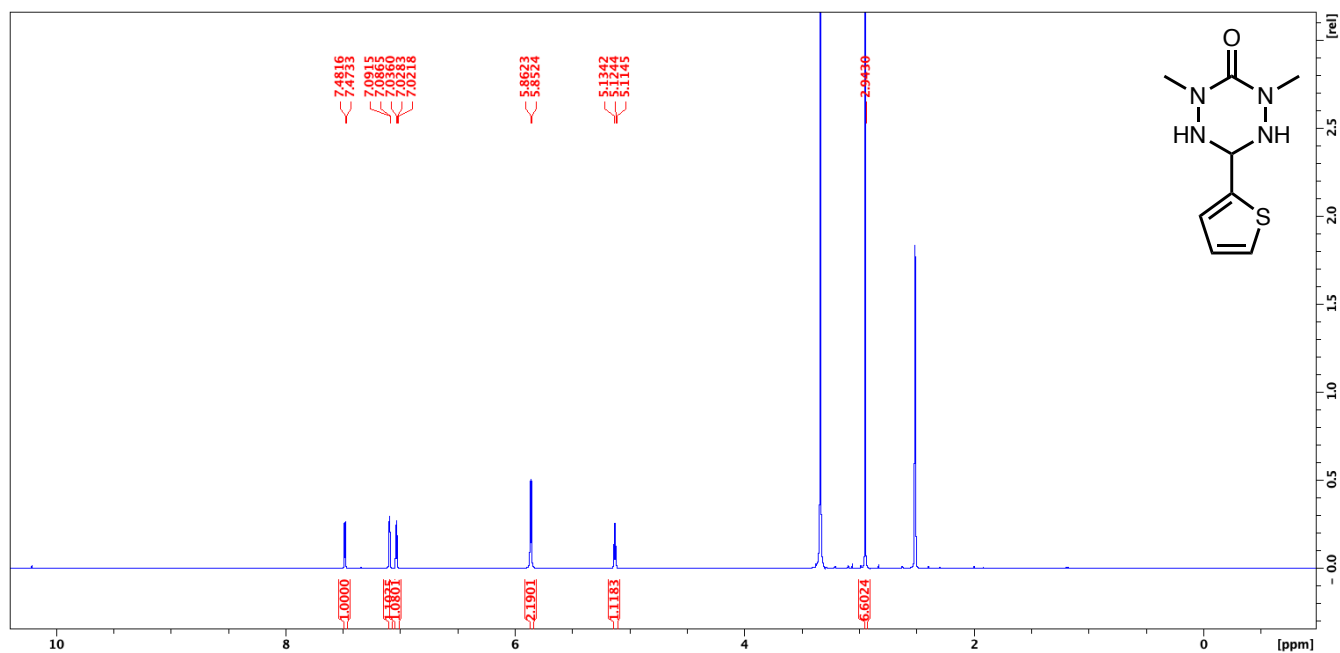Fig. S96:  $^{13}\text{C}$  NMR of **11c**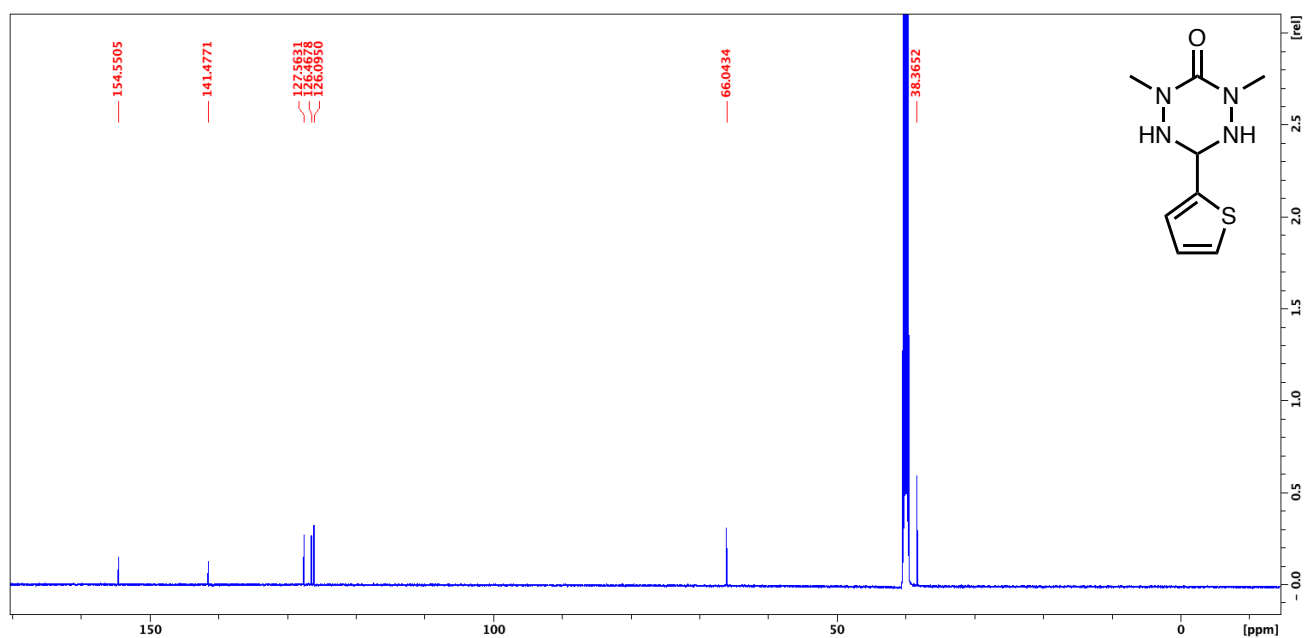

**Fig. S97:**  $^1\text{H}$  NMR 1,5-dimethyl-3-(2-thiophene)-6-oxo-leucoverdazyl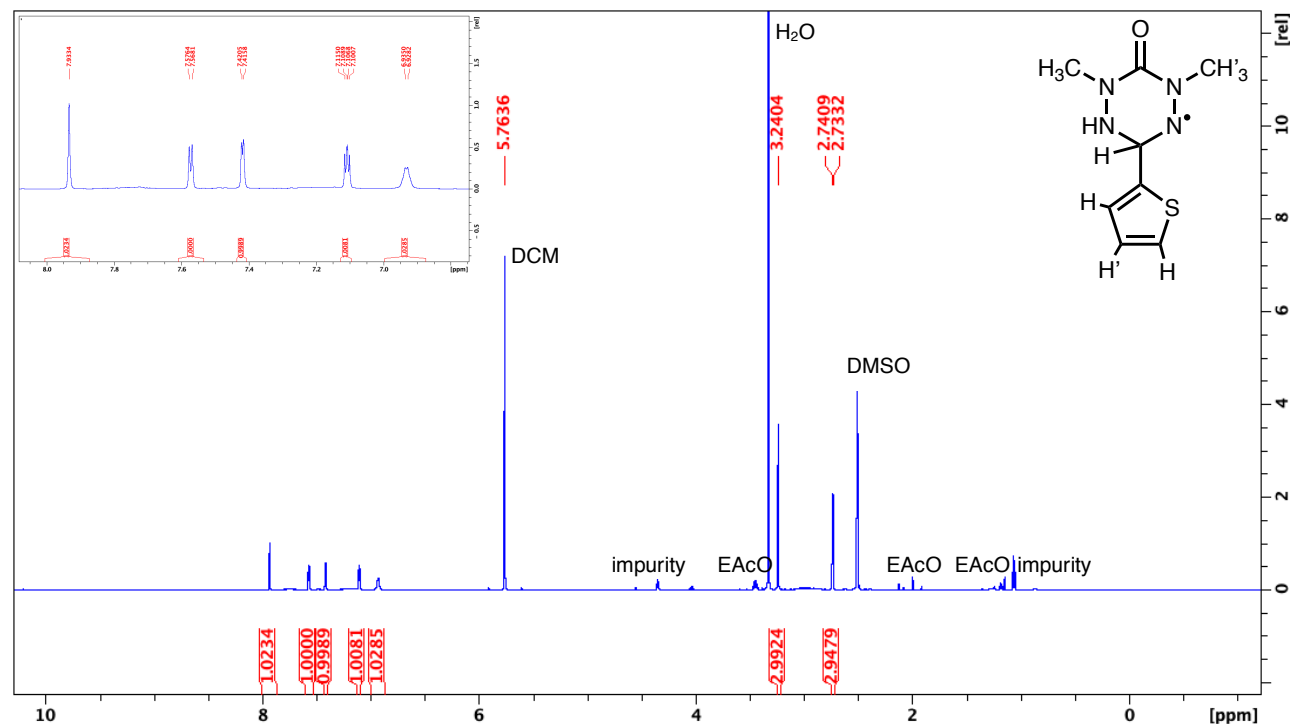

$^1\text{H}$  NMR ( $\delta$  / ppm, DMSO- $d_6$ ): 7.93 (s, 1H NH), 7.52 (d, 1H  $J=4.97$  Hz, ArH), 7.41(d, 1H,  $J= 2.83$  Hz ArH), 7.11(t, 1H,  $J= 2.85$  Hz ArH'), 6.93(d, br  $J=4.05$  Hz CH), 3.24(s, 3H, CH<sub>3</sub>) 2.74(d, 3H,  $J=4.65$  Hz, CH<sub>3</sub>).

**Fig. S98:**  $^{13}\text{C}$  HMR 1,5-dimethyl-3-(2-thiophene)-6-oxo-leucoverdazyl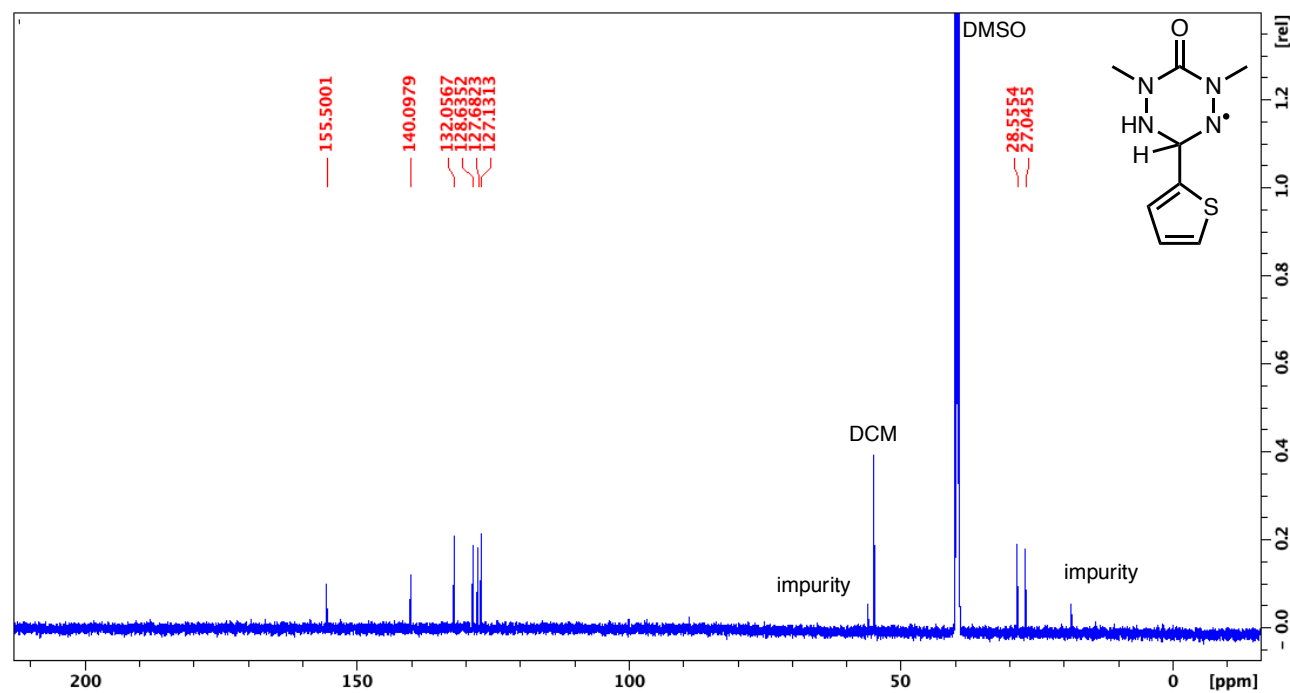

$^{13}\text{C}$  NMR ( $\delta$  / ppm, DMSO- $d_6$ ): 155.5(C=O), 140.1(C), 132.1(CH), 128.6(ArCH), 127.7(ArCH), 127.1(ArCH), 28.5(CH<sub>3</sub>), 27.0(CH<sub>3</sub>).

Fig. S99:  $^1\text{H}$  NMR of 12b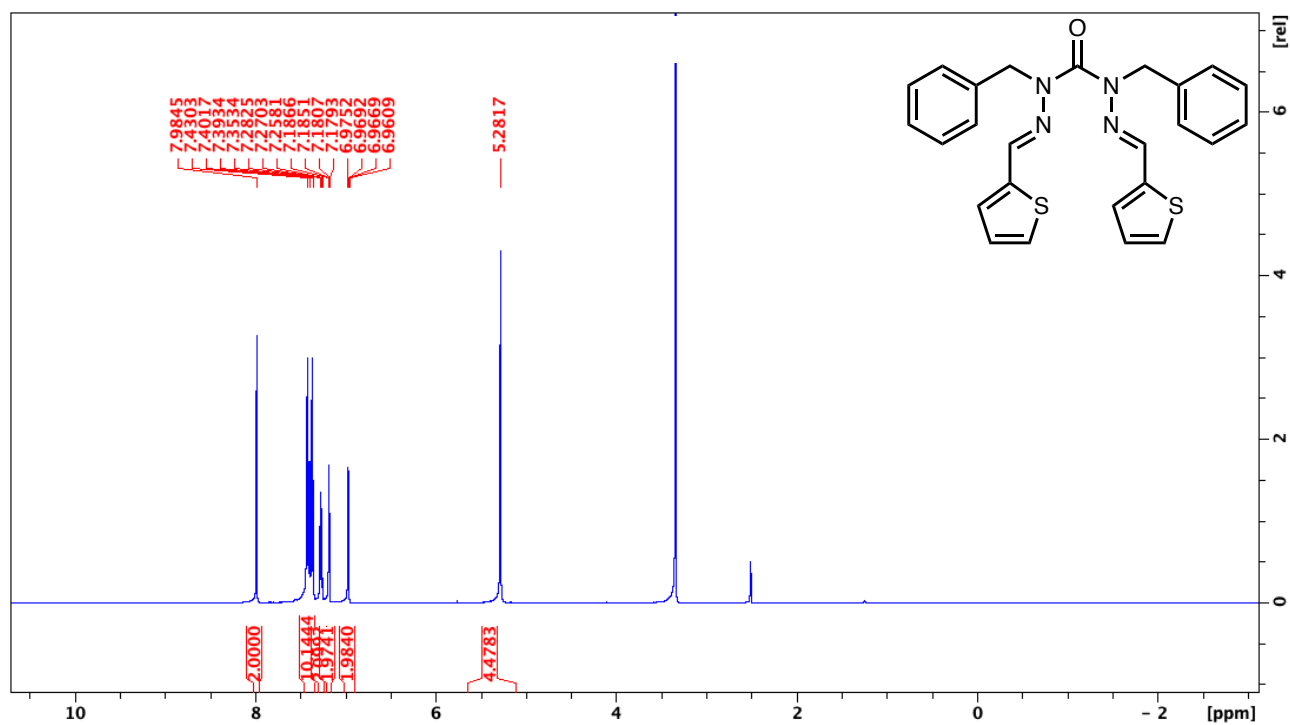Fig. S100:  $^{13}\text{C}$  NMR 12b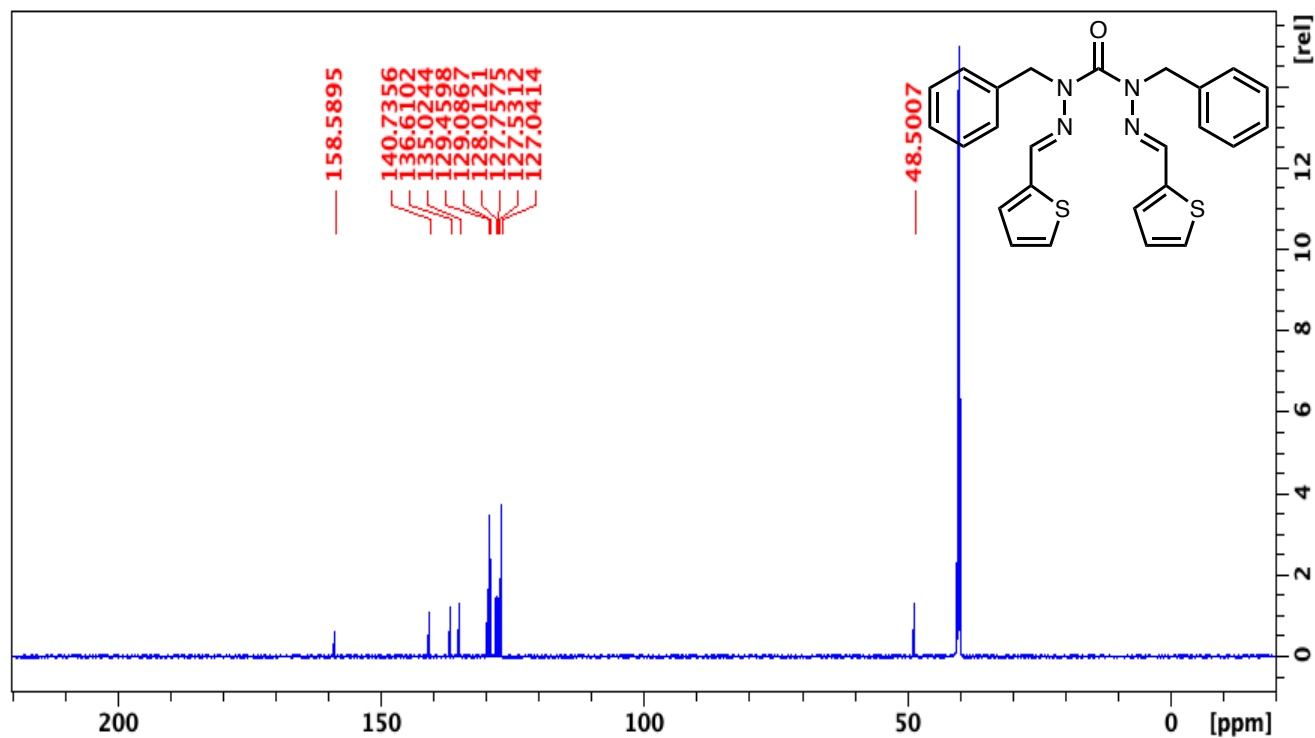

Fig. S101:  $^1\text{H}$  NMR of **12c**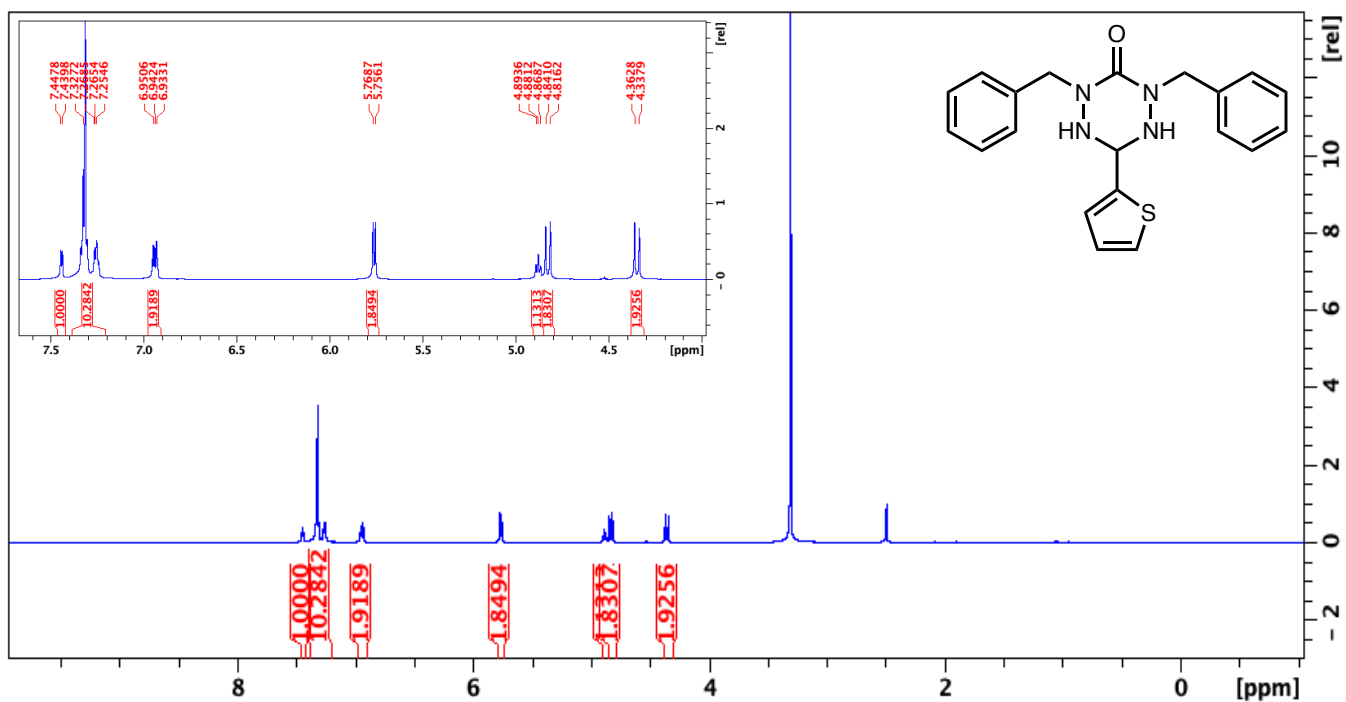Fig. S102:  $^{13}\text{C}$  NMR of **12c**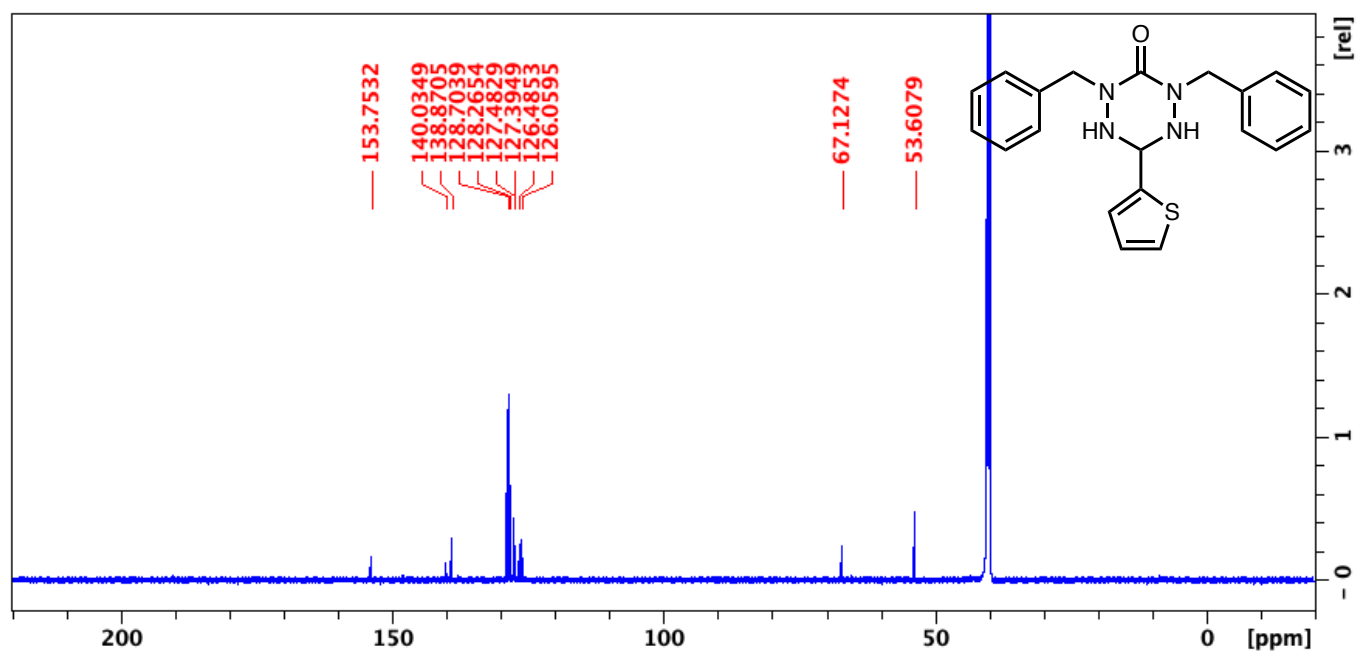



Fig. S103:  $^1\text{H}$  NMR of **13a**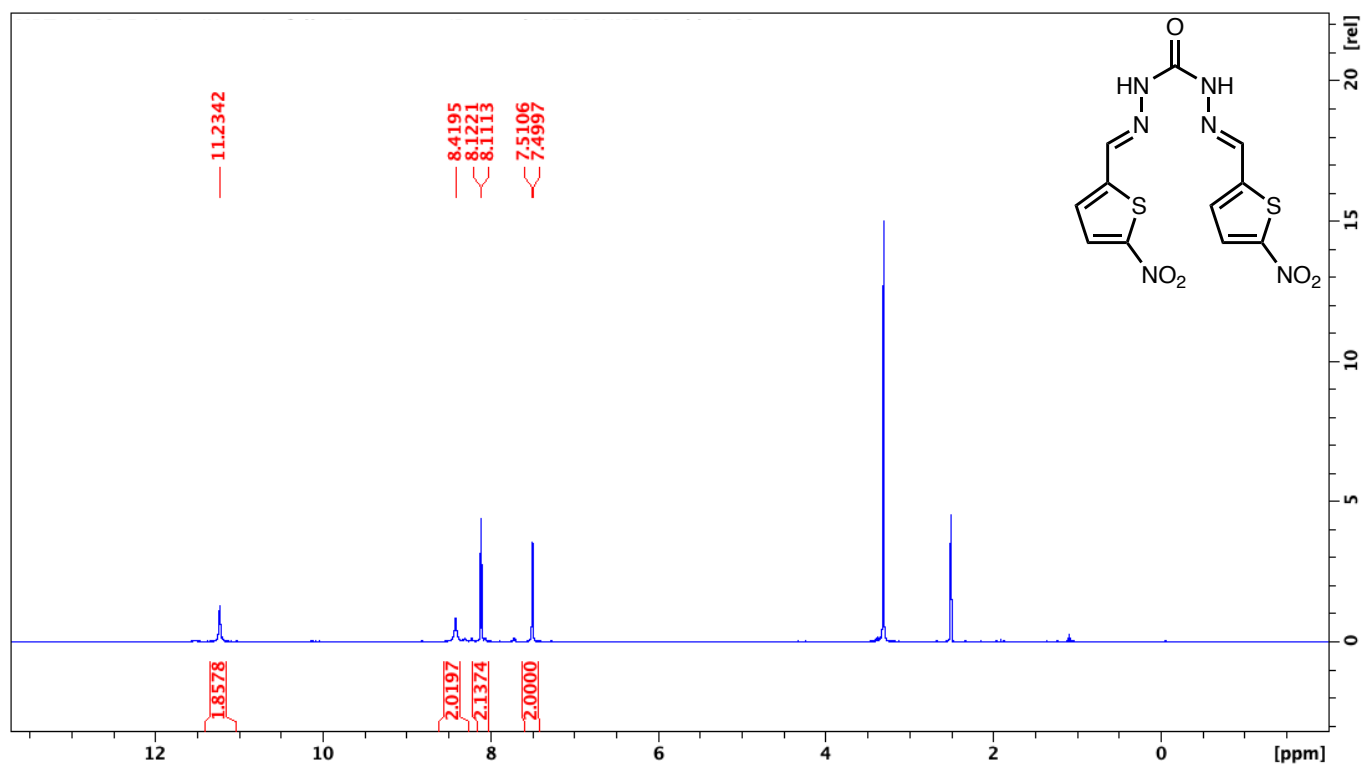Fig. S104:  $^{13}\text{C}$  NMR of **13a**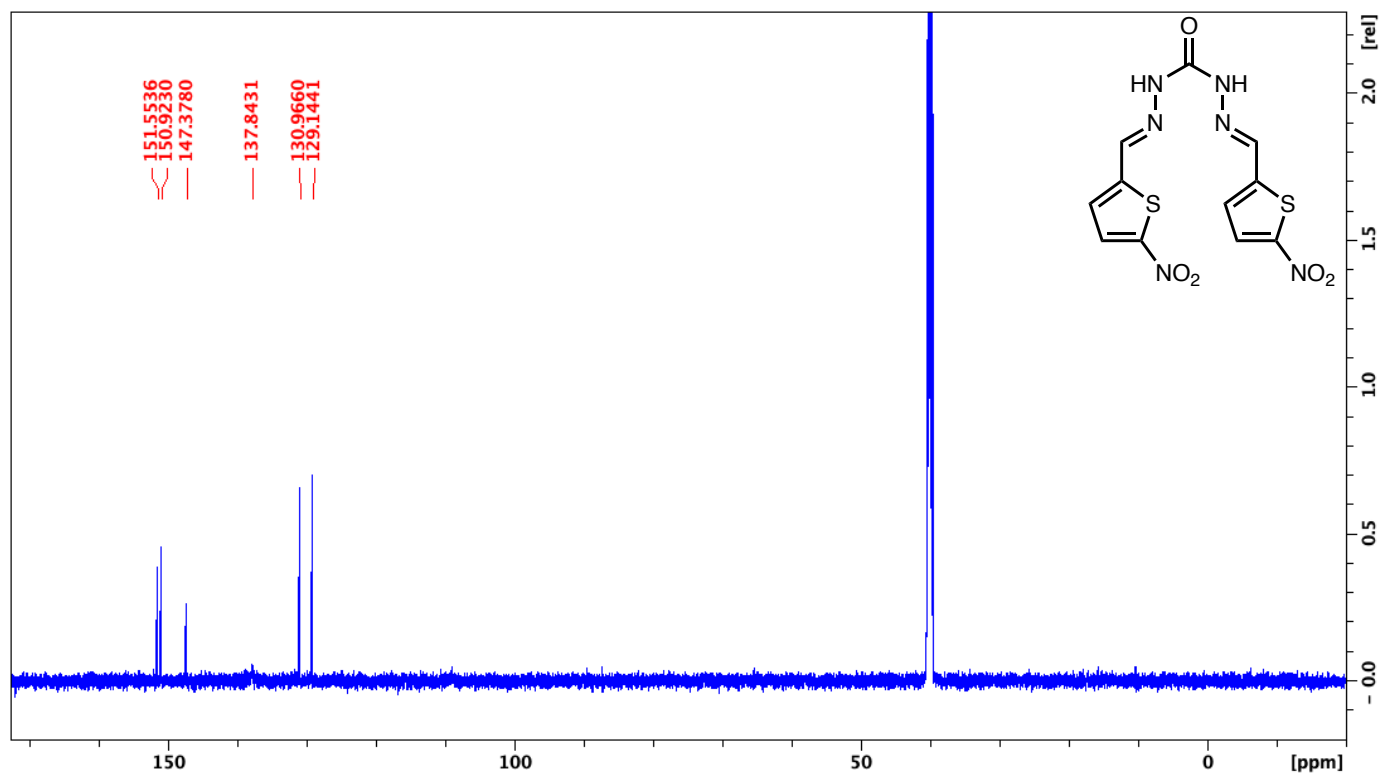

Fig. S105:  $^1\text{H}$  NMR of **13b**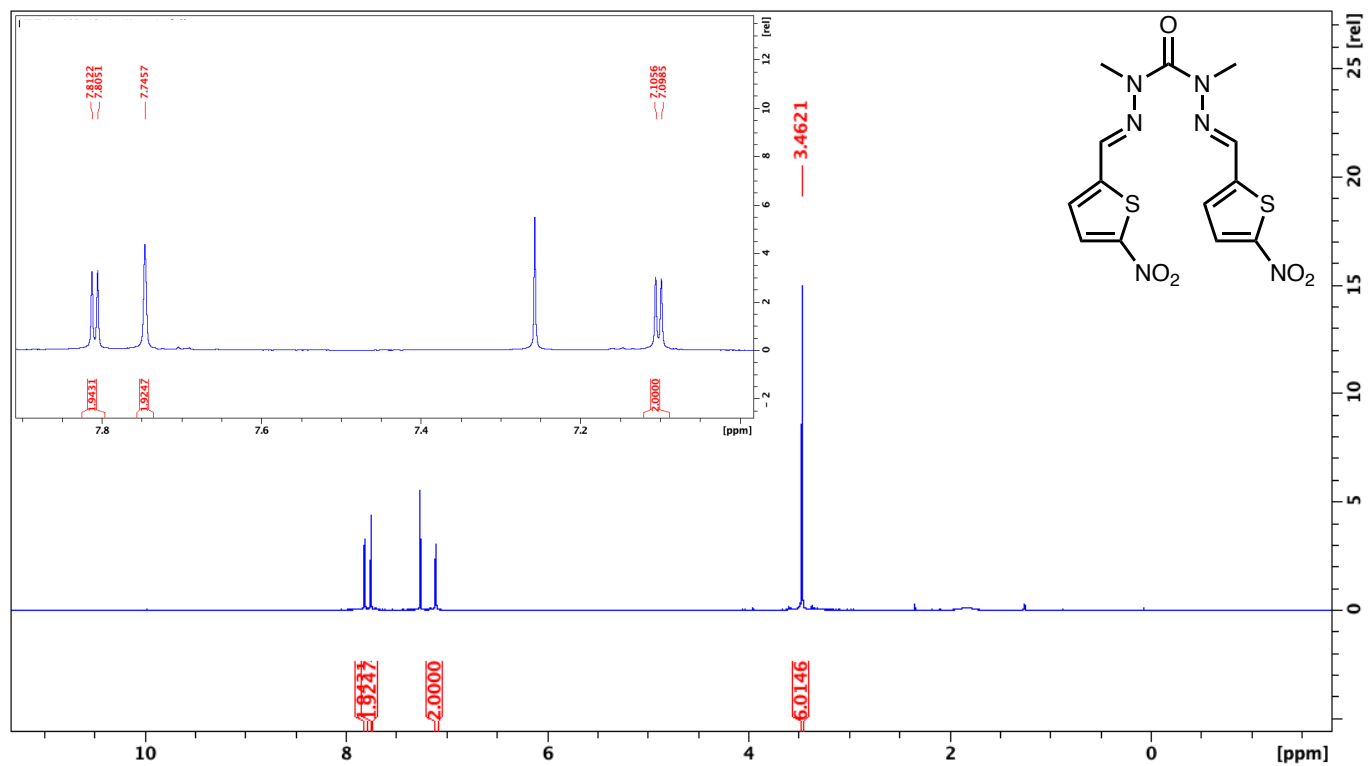Fig. S106:  $^{13}\text{C}$  NMR of **13b**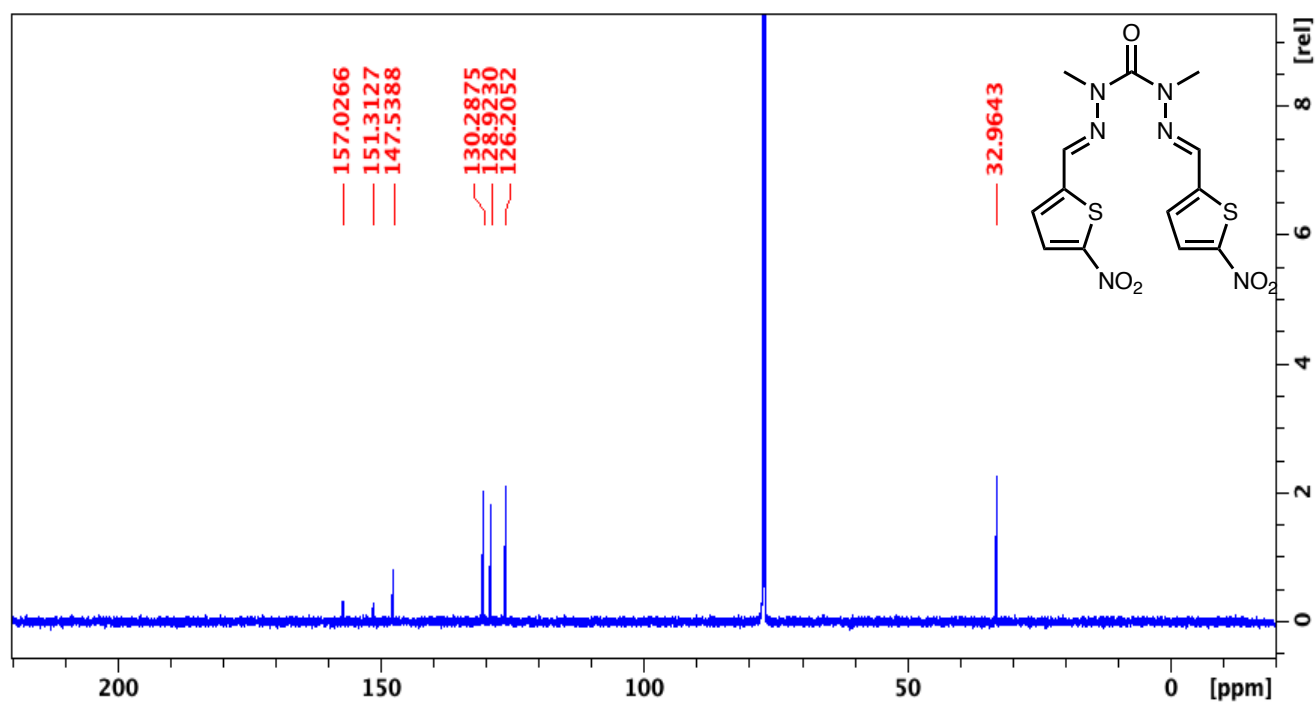

Fig. S107:  $^1\text{H}$  NMR of **13c**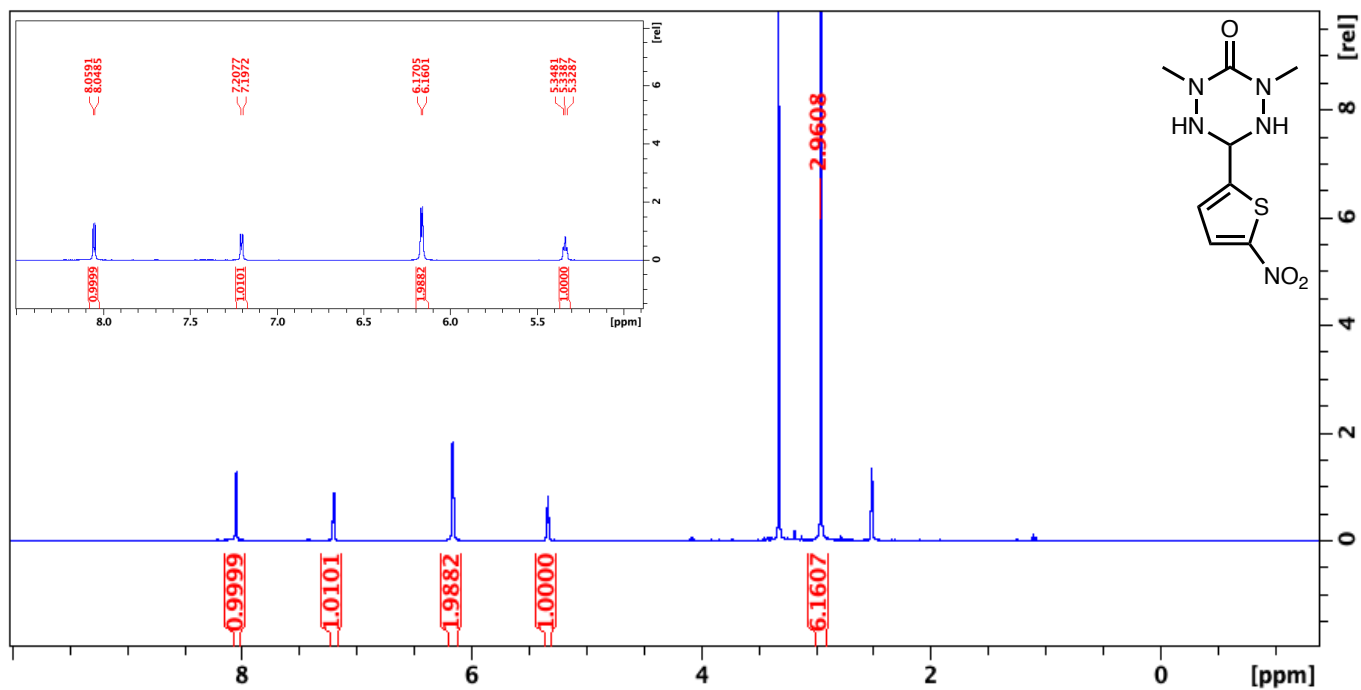Fig. S108:  $^{13}\text{C}$  NMR of **13c**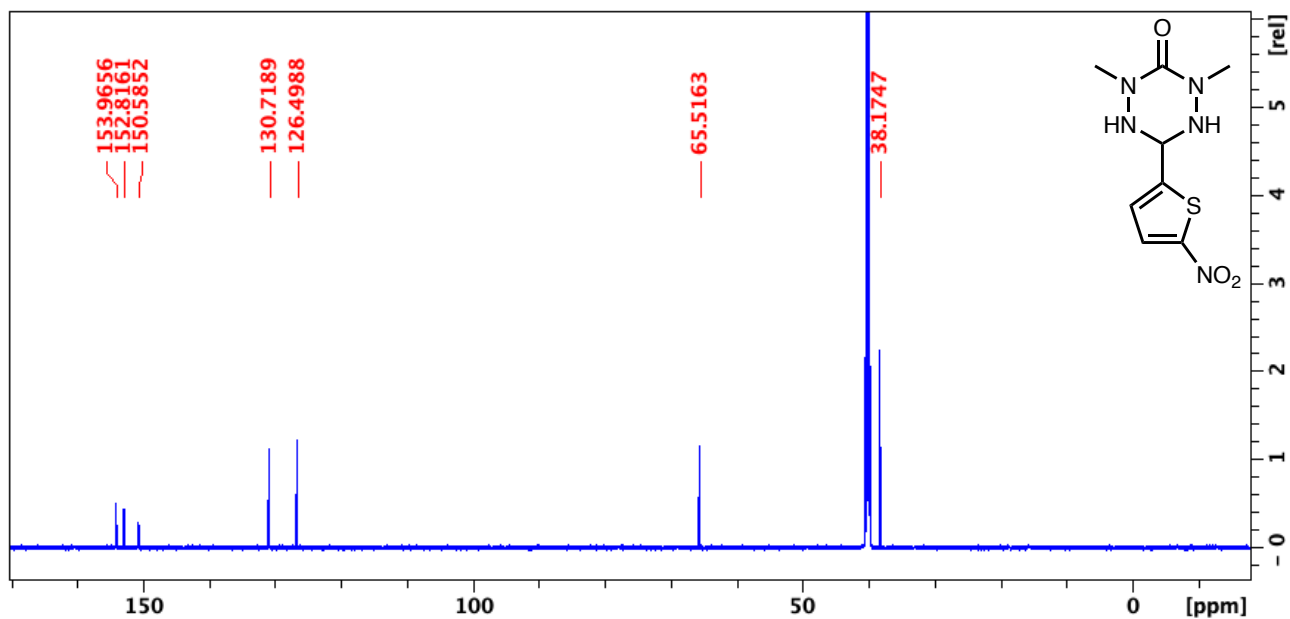

Fig. S109:  $^1\text{H}$  NMR of **14b**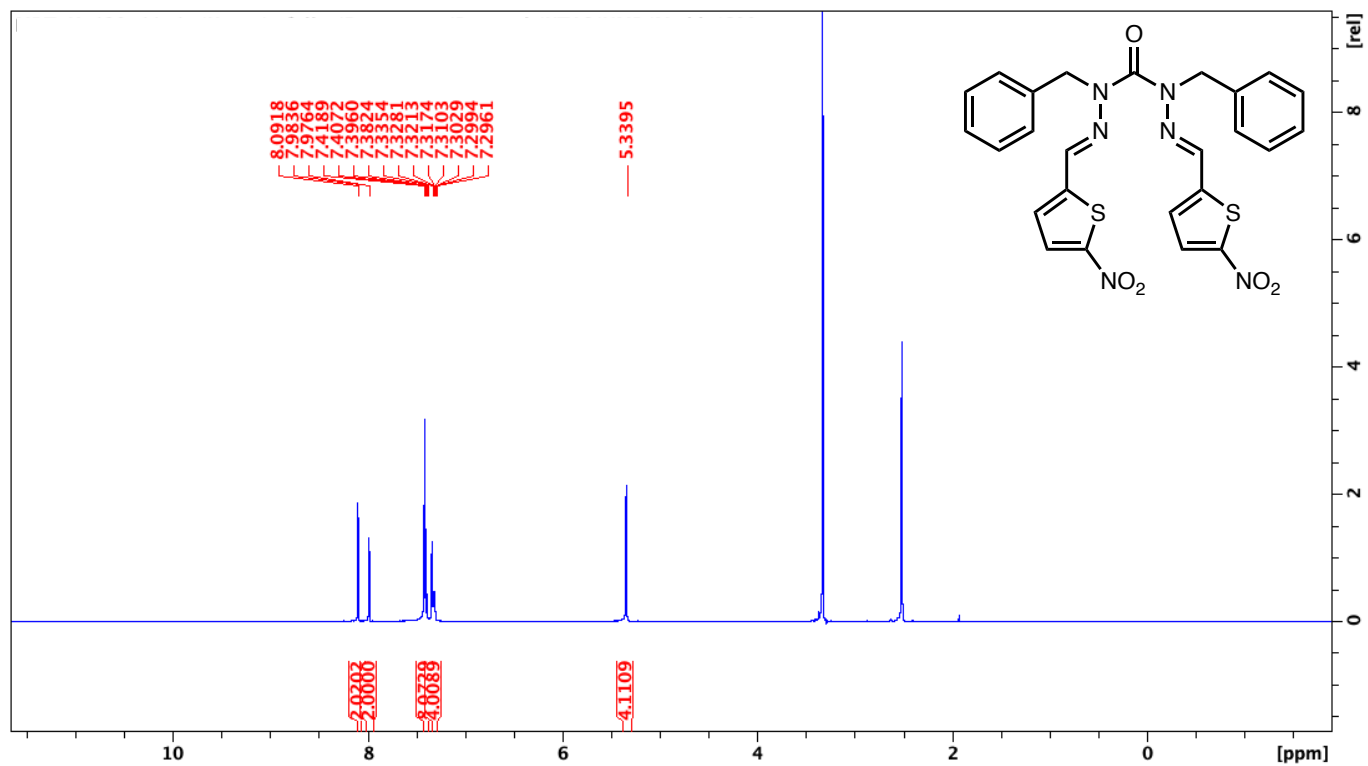Fig. S110:  $^{13}\text{C}$  NMR of **14b**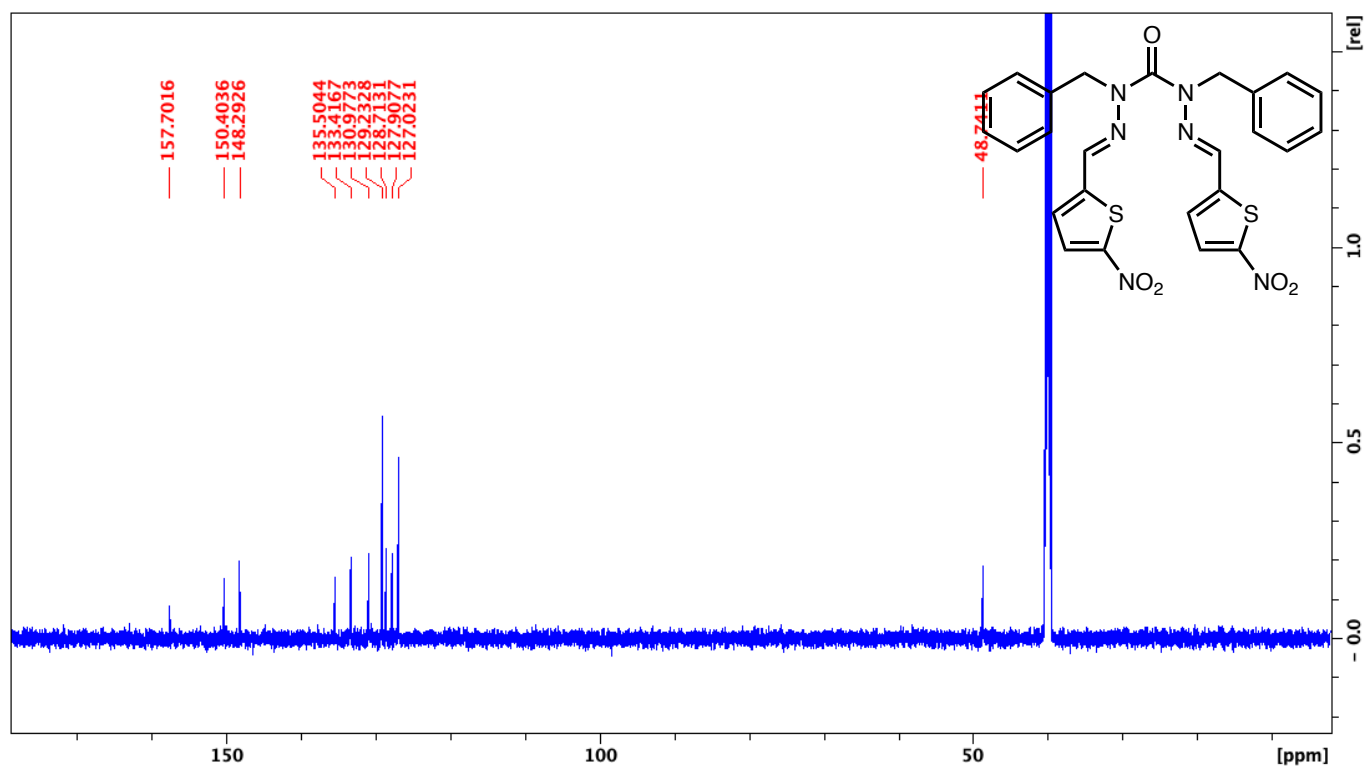

Fig. S111:  $^1\text{H}$  NMR of **14c**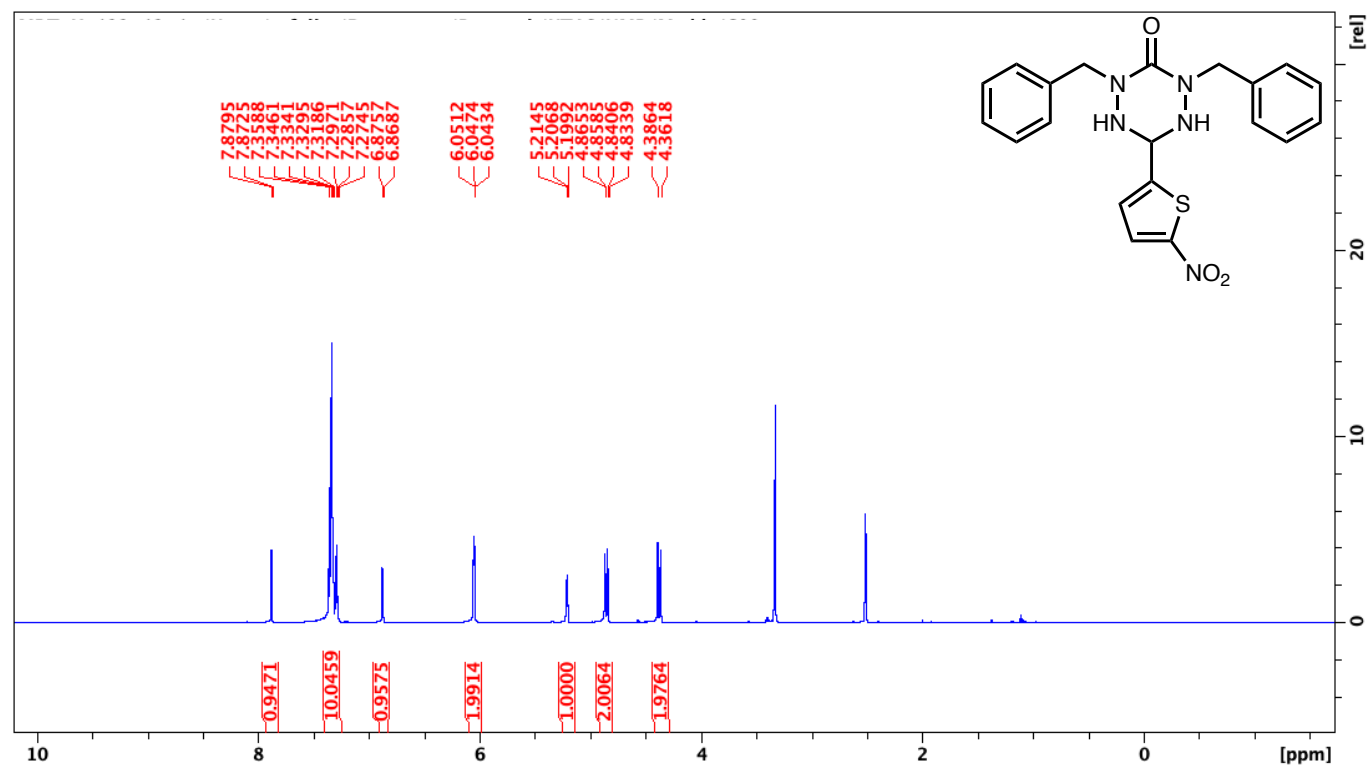Fig. S112:  $^{13}\text{C}$  NMR of **14c**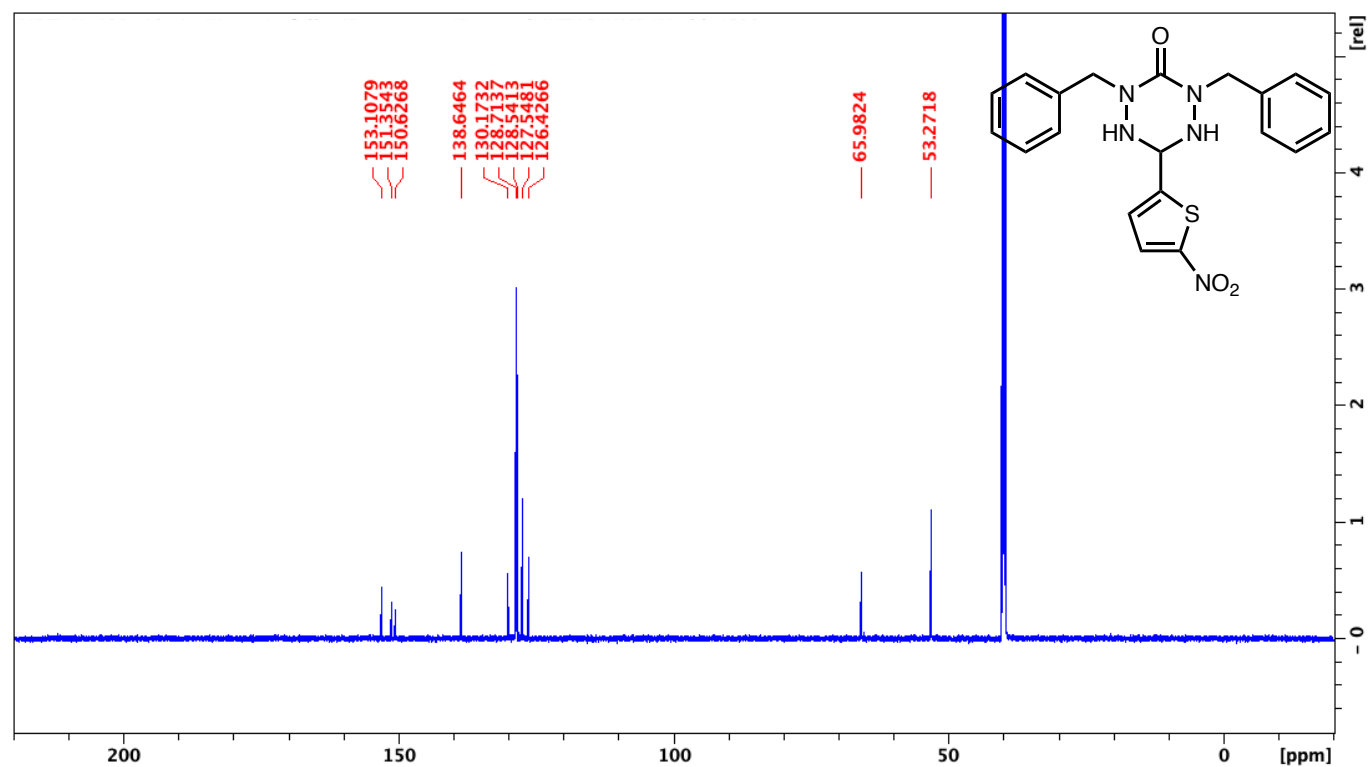

## IV. Computational Details

Fig. S113: Gaussview diagrams and Energy parameters and Cartesian coordinates for calculated species

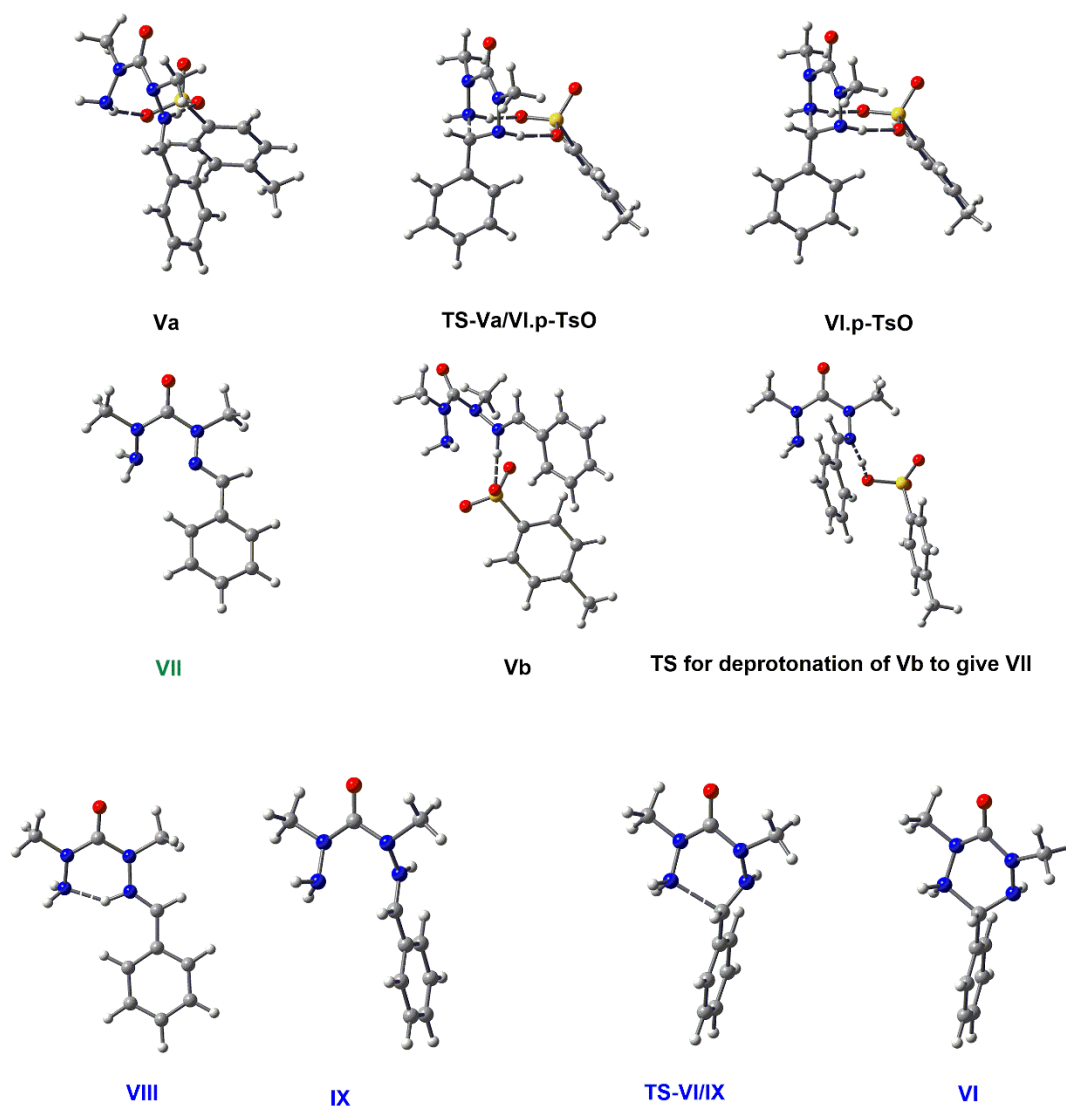

## Energy parameters and Cartesian coordinates for calculated species

All calculations related to thermodynamic effects are obtained using B3LYP/BS1; single-point data, listed immediately after BS1 data and before coordinates, are calculated using BS2 and M06-2X incorporating Grimme's D3 computation as discussed in the manuscript.

## Va

E(RB3LYP) = -1579.04154272  
 Zero-point correction= 0.385986 (Hartree/Particle)  
 Thermal correction to Energy= 0.412851  
 Thermal correction to Enthalpy= 0.413795  
 Thermal correction to Gibbs Free Energy= 0.323830  
 Sum of electronic and zero-point Energies= -1578.655557  
 Sum of electronic and thermal Energies= -1578.628692  
 Sum of electronic and thermal Enthalpies= -1578.627748  
 Sum of electronic and thermal Free Energies= -1578.717712  
 E(RM062X) = -684.024151901

C -0.45977 -5.24439 2.40165  
 C 0.82502 -5.75219 2.58147  
 C 1.88685 -4.87826 2.82703  
 C 1.67183 -3.49179 2.88187

## Supporting Information

C 0.39574 -2.97501 2.69778  
C -0.68428 -3.85123 2.46877  
H -1.28944 -5.91475 2.21558  
H 0.99892 -6.81932 2.53421  
H 2.8921 -5.27256 2.96958  
H 2.50514 -2.81987 3.05869  
H 0.23374 -1.90123 2.73445  
C -2.04991 -3.41022 2.30377  
H -1.84429 -1.34109 2.47344  
N -2.47893 -2.17554 2.402  
C -4.21622 -1.86806 0.67282  
O -5.26241 -1.26787 0.42394  
C -4.45632 -0.99845 2.97902  
H -3.98171 -0.00934 3.00009  
H -5.49598 -0.89226 2.67085  
H -4.40826 -1.44929 3.97215  
C -3.96675 -2.34897 -1.69256  
H -3.77138 -3.26284 -2.26101  
H -5.03093 -2.12218 -1.73098  
H -3.40034 -1.52103 -2.14237  
N -3.78952 -1.89398 2.02756  
N -3.55372 -2.56912 -0.3053  
N -2.25011 -3.09427 -0.13456  
H -1.56759 -2.36159 -0.35669  
H -2.14704 -3.87367 -0.78569  
C 1.61475 0.46408 -0.53728  
C 1.04598 0.68598 0.71889  
C 1.85552 1.03067 1.80045  
C 3.23394 1.1453 1.62386  
C 3.82727 0.92283 0.37163  
C 2.99523 0.58316 -0.70501  
H 0.98241 0.19112 -1.37561  
H 1.41042 1.19633 2.77609  
H 3.85948 1.41165 2.47245  
H 3.43308 0.40726 -1.68461  
C 5.32456 1.01873 0.19602  
H 5.80934 0.06011 0.42405  
H 5.5906 1.2812 -0.83295  
H 5.75862 1.76837 0.8658  
S -0.73856 0.61225 0.91194  
O -1.23085 -0.34654 -0.12371  
O -0.95121 0.09182 2.31877  
O -1.25487 1.99296 0.74581  
H -2.81997 -4.15448 2.13389

### Vb

E(RB3LYP) = -1579.03833913  
Zero-point correction= 0.385463 (Hartree/Particle)  
Thermal correction to Energy= 0.412623  
Thermal correction to Enthalpy= 0.413567  
Thermal correction to Gibbs Free Energy= 0.321736  
Sum of electronic and zero-point Energies= -1578.652876  
Sum of electronic and thermal Energies= -1578.625716  
Sum of electronic and thermal Enthalpies= -1578.624772  
Sum of electronic and thermal Free Energies= -1578.716603  
E(RM062X) = -1578.96660998

C 0.03248 -3.05909 2.85982  
C 1.3571 -3.40976 3.1052  
C 2.29379 -3.34371 2.06862  
C 1.90723 -2.93427 0.7858  
C 0.58646 -2.58657 0.52981  
C -0.36425 -2.63699 1.57125  
H -0.69682 -3.10178 3.66191  
H 1.66108 -3.73107 4.09704  
H 3.32957 -3.6127 2.25545  
H 2.6387 -2.89186 -0.01306  
H 0.29111 -2.27346 -0.4669  
C -1.75243 -2.26323 1.40282  
H -1.88785 -1.60177 -0.56505  
N -2.33001 -1.82449 0.32648  
C -4.62918 -2.55073 0.76626  
O -5.67721 -2.2405 1.32632  
C -4.03645 -0.15826 0.67967

## Supporting Information

H -3.38596 0.47615 0.0739  
H -5.0804 0.01615 0.40839  
H -3.89274 0.07304 1.74295  
C -5.25663 -4.90276 0.82577  
H -4.71537 -5.8444 0.94989  
H -5.75 -4.64309 1.76762  
H -6.02222 -5.02669 0.04989  
N -3.71309 -1.56 0.38142  
N -4.29428 -3.86116 0.474  
N -3.45261 -4.09948 -0.63344  
H -4.02136 -4.40989 -1.42199  
H -2.82263 -4.86163 -0.39246  
C 0.96253 -0.28967 -4.07968  
C 0.50272 0.04855 -2.80966  
C 1.40183 0.42915 -1.8074  
C 2.76934 0.45582 -2.08716  
C 3.2598 0.11043 -3.35925  
C 2.33353 -0.25735 -4.34626  
H 0.25618 -0.57173 -4.85427  
H 1.03944 0.70785 -0.82749  
H 3.46746 0.75034 -1.31184  
H 2.6922 -0.52861 -5.33903  
C 4.73502 0.1676 -3.66126  
H 5.01842 -0.56666 -4.422  
H 5.02257 1.15729 -4.03991  
H 5.33746 -0.02627 -2.76539  
S -1.25404 -0.04599 -2.42912  
O -1.44387 -1.43631 -1.80785  
O -1.52843 1.01264 -1.41723  
O -1.97239 0.0897 -3.7138  
H -2.3926 -2.36633 2.28434

## VI

E(RB3LYP) = -684.099370935  
Zero-point correction= 0.257129 (Hartree/Particle)  
Thermal correction to Energy= 0.271229  
Thermal correction to Enthalpy= 0.272173  
Thermal correction to Gibbs Free Energy= 0.215410  
Sum of electronic and zero-point Energies= -683.842242  
Sum of electronic and thermal Energies= -683.828142  
Sum of electronic and thermal Enthalpies= -683.827198  
Sum of electronic and thermal Free Energies= -683.883961  
E(RM062X) = -684.031413942

C -0.46514 -5.18833 2.52142  
C 0.85523 -5.58826 2.76774  
C 1.88836 -4.65169 2.7058  
C 1.60309 -3.31377 2.41356  
C 0.28664 -2.91326 2.16089  
C -0.7542 -3.84991 2.20715  
H -1.26553 -5.91882 2.57625  
H 1.06438 -6.62447 3.00986  
H 2.91203 -4.96158 2.89136  
H 2.4021 -2.5839 2.36985  
H 0.09997 -1.87008 1.91528  
C -2.19366 -3.48421 1.93803  
H -1.96637 -1.47249 2.31203  
N -2.61559 -2.24742 2.49409  
C -4.1118 -1.68279 0.74885  
O -5.03716 -1.03268 0.2861  
C -4.79497 -1.31903 3.08386  
H -4.49447 -0.28485 3.28324  
H -5.81691 -1.33002 2.71253  
H -4.72741 -1.90755 3.99998  
C -3.25337 -2.06022 -1.53999  
H -3.98868 -2.76448 -1.94841  
H -3.58798 -1.0387 -1.72455  
H -2.28374 -2.21338 -2.02197  
N -3.92745 -1.94258 2.08386  
N -3.09269 -2.20689 -0.08188  
N -2.47551 -3.43014 0.33761  
H -1.59425 -3.54512 -0.16796  
H -3.06218 -4.26585 0.16624  
H -2.89332 -4.27214 2.25923



## Supporting Information

### VI.p-TsO

E(RB3LYP) = -1579.04878569  
Zero-point correction= 0.389073 (Hartree/Particle)  
Thermal correction to Energy= 0.414914  
Thermal correction to Enthalpy= 0.415858  
Thermal correction to Gibbs Free Energy= 0.327784  
Sum of electronic and zero-point Energies= -1578.659712  
Sum of electronic and thermal Energies= -1578.633872  
Sum of electronic and thermal Enthalpies= -1578.632928  
Sum of electronic and thermal Free Energies= -1578.721001  
E(RM062X) = -1578.98415492

C -0.76977 -5.33777 2.39045  
C 0.45748 -5.92008 2.70937  
C 1.58269 -5.11464 2.89788  
C 1.47646 -3.72756 2.76653  
C 0.25237 -3.14003 2.44363  
C -0.87995 -3.94678 2.25555  
H -1.64591 -5.96561 2.25068  
H 0.53127 -6.99838 2.81435  
H 2.5386 -5.56555 3.14854  
H 2.34887 -3.09783 2.91429  
H 0.18577 -2.0607 2.34824  
C -2.22889 -3.3696 1.89989  
H -1.92085 -1.42542 2.47419  
N -2.59533 -2.1913 2.61463  
C -4.32669 -1.79201 0.92717  
O -5.38397 -1.29088 0.55377  
C -4.66835 -1.11401 3.27056  
H -4.1958 -0.18466 3.60832  
H -5.65719 -0.89164 2.87305  
H -4.74754 -1.80379 4.11539  
C -3.71258 -2.335 -1.41961  
H -3.58175 -3.27788 -1.95858  
H -4.72055 -1.96241 -1.58692  
H -2.97858 -1.59988 -1.76797  
N -3.87822 -1.73631 2.21724  
N -3.58125 -2.57834 0.01913  
N -2.26428 -3.02007 0.39409  
H -1.54509 -2.26359 0.1551  
H -2.05415 -3.85882 -0.16119  
C 1.96651 0.50312 -0.81367  
C 1.26839 0.60707 0.39455  
C 1.9217 1.03573 1.55018  
C 3.28009 1.35603 1.49409  
C 4.00068 1.25702 0.29695  
C 3.32045 0.82595 -0.85442  
H 1.45804 0.16258 -1.71008  
H 1.37404 1.10954 2.48336  
H 3.7861 1.68735 2.39744  
H 3.86026 0.74079 -1.79448  
C 5.47413 1.58483 0.24199  
H 6.07748 0.67286 0.14599  
H 5.70968 2.21718 -0.6215  
H 5.80184 2.10558 1.14677  
S -0.49181 0.25944 0.43304  
O -0.65361 -1.00528 -0.38366  
O -0.835 0.02598 1.87312  
O -1.18783 1.41825 -0.17148  
H -3.01441 -4.11914 2.01292

### VII

E(RB3LYP) = -683.662036318  
Zero-point correction= 0.240051 (Hartree/Particle)  
Thermal correction to Energy= 0.254918  
Thermal correction to Enthalpy= 0.255862  
Thermal correction to Gibbs Free Energy= 0.197270  
Sum of electronic and zero-point Energies= -683.421985  
Sum of electronic and thermal Energies= -683.407118  
Sum of electronic and thermal Enthalpies= -683.406174  
Sum of electronic and thermal Free Energies= -683.464766  
E(RM062X) = -683.598954138

## Supporting Information

C 0.45048 -2.03299 -0.21007  
C 1.83648 -1.94411 -0.19517  
C 2.46306 -0.71393 0.04527  
C 1.69823 0.43291 0.2707  
C 0.30848 0.35272 0.25739  
C -0.33109 -0.8809 0.02076  
H -0.01429 -2.99384 -0.4078  
H 2.4335 -2.83249 -0.37493  
H 3.54713 -0.65297 0.05265  
H 2.18224 1.38668 0.45477  
H -0.29005 1.2419 0.43268  
C -1.77918 -0.87869 0.03543  
H -2.28579 0.06983 0.16926  
N -2.51077 -1.94425 -0.097  
C -4.59202 -3.17807 0.15554  
O -5.79795 -3.099 0.34921  
C -4.60565 -0.72046 -0.19973  
H -4.50457 -0.16837 0.74206  
H -4.22976 -0.11755 -1.03102  
H -5.65306 -0.95846 -0.36107  
C -4.69039 -5.59531 0.47986  
H -4.05501 -6.30499 1.01579  
H -5.56041 -5.35351 1.08719  
H -5.01878 -6.04348 -0.46598  
N -3.88089 -1.98642 -0.16002  
N -3.9178 -4.37379 0.24399  
N -2.62829 -4.52696 -0.32052  
H -2.69541 -4.98666 -1.23218  
H -2.07643 -5.1233 0.29656

### VIII

E(RB3LYP) = -684.108729219  
Zero-point correction= 0.254162 (Hartree/Particle)  
Thermal correction to Energy= 0.268910  
Thermal correction to Enthalpy= 0.269854  
Thermal correction to Gibbs Free Energy= 0.211485  
Sum of electronic and zero-point Energies= -683.854568  
Sum of electronic and thermal Energies= -683.839819  
Sum of electronic and thermal Enthalpies= -683.838875  
Sum of electronic and thermal Free Energies= -683.897245  
E(RM062X) = -684.029882824

C 0.40917 -2.02128 0.  
C 1.80433 -2.02128 0.  
C 2.50186 -0.81353 0.  
C 1.80421 0.39498 -0.0012  
C 0.40938 0.39491 -0.00168  
C -0.28822 -0.8133 -0.00068  
H -0.14059 -2.97359 0.00045  
H 2.35383 -2.97379 0.00132  
H 3.60154 -0.81345 0.00063  
H 2.35441 1.34713 -0.00126  
H -0.14074 1.34719 -0.00263  
C -1.82822 -0.81304 -0.00093  
H -2.36122 0.11277 -0.06166  
H -1.9777 -2.9066 0.14474  
N -2.51067 -1.98137 0.07549  
C -4.73307 -3.15027 0.13943  
O -6.16004 -3.13723 0.23149  
C -4.81769 -0.6503 -0.03666  
H -4.7304 -0.11837 0.88763  
H -4.40583 -0.05984 -0.82826  
H -5.84979 -0.84747 -0.23861  
C -4.65956 -5.66024 0.2039  
H -3.97005 -6.47815 0.18194  
H -5.2174 -5.68841 1.11655  
H -5.33007 -5.7366 -0.62645  
N -4.05062 -1.98194 0.06301  
N -3.97711 -4.49191 0.12747  
N -2.44037 -4.50595 0.02833  
H -2.04655 -4.45042 -0.75667  
H -1.93964 -5.35974 0.17082

### IX

## Supporting Information

E(RB3LYP) = -684.098583939  
Zero-point correction= 0.253779 (Hartree/Particle)  
Thermal correction to Energy= 0.268935  
Thermal correction to Enthalpy= 0.269879  
Thermal correction to Gibbs Free Energy= 0.210581  
Sum of electronic and zero-point Energies= -683.844805  
Sum of electronic and thermal Energies= -683.829649  
Sum of electronic and thermal Enthalpies= -683.828705  
Sum of electronic and thermal Free Energies= -683.888003  
E(RM062X) = -684.024151901

C -0.43454 -5.19853 2.63362  
C 0.88583 -5.60866 2.76774  
C 1.91896 -4.67209 2.665  
C 1.63369 -3.32397 2.41356  
C 0.31724 -2.90306 2.28329  
C -0.7338 -3.83971 2.41115  
H -1.24513 -5.91882 2.70885  
H 1.11538 -6.65507 2.94866  
H 2.95283 -4.99218 2.76896  
H 2.4429 -2.6043 2.31885  
H 0.11017 -1.85988 2.06828  
C -2.12226 -3.47401 2.33583  
H -1.96637 -1.44189 2.47523  
N -2.59519 -2.24742 2.44309  
C -4.1016 -1.71339 0.68765  
O -5.02696 -0.99188 0.3371  
C -4.74397 -1.32923 3.04306  
H -4.43327 -0.28485 3.18124  
H -5.77611 -1.35042 2.69213  
H -4.66621 -1.86675 3.98978  
C -3.36557 -1.90723 -1.63179  
H -4.12128 -2.55028 -2.10141  
H -3.66958 -0.8653 -1.72455  
H -2.40614 -2.05018 -2.13417  
N -3.91725 -2.02418 2.05326  
N -3.18449 -2.23749 -0.21448  
N -2.58771 -3.49134 0.05201  
H -1.69625 -3.53492 -0.44336  
H -3.18458 -4.25565 -0.28256  
H -2.88312 -4.25174 2.36123

### p-TsO<sup>-</sup>

E(RB3LYP) = -894.914558301  
Zero-point correction= 0.131088 (Hartree/Particle)  
Thermal correction to Energy= 0.141189  
Thermal correction to Enthalpy= 0.142133  
Thermal correction to Gibbs Free Energy= 0.093379  
Sum of electronic and zero-point Energies= -894.783470  
Sum of electronic and thermal Energies= -894.773370  
Sum of electronic and thermal Enthalpies= -894.772426  
Sum of electronic and thermal Free Energies= -894.821179  
E(RM062X) = -894.918341257

C 2.11538 0.71497 0.31235  
C 1.16756 1.0075 1.29923  
C 1.50528 0.92429 2.6499  
C 2.7987 0.54218 3.01222  
C 3.76419 0.24038 2.04328  
C 3.40034 0.33394 0.68921  
H 1.84776 0.77459 -0.73777  
H 0.76212 1.15138 3.40653  
H 3.05881 0.47745 4.06571  
H 4.13439 0.10411 -0.07923  
C 5.15579 -0.19546 2.4364  
H 5.28945 -1.27311 2.27572  
H 5.9179 0.31527 1.83722  
H 5.35598 0.0095 3.49239  
S -0.46561 1.57656 0.82782  
O -0.89153 0.62844 -0.31863  
O -1.33851 1.42324 2.01298  
O -0.32518 2.94526 0.28932

### p-TsOH

## Supporting Information

E(RB3LYP) = -895.358735877  
Zero-point correction= 0.142395 (Hartree/Particle)  
Thermal correction to Energy= 0.153138  
Thermal correction to Enthalpy= 0.154082  
Thermal correction to Gibbs Free Energy= 0.103997  
Sum of electronic and zero-point Energies= -895.216341  
Sum of electronic and thermal Energies= -895.205598  
Sum of electronic and thermal Enthalpies= -895.204654  
Sum of electronic and thermal Free Energies= -895.254739  
E(RM062X) = -895.351074943

H -1.61259 -0.51779 0.12538  
C 2.11538 0.71497 0.31235  
C 1.16756 1.0075 1.29923  
C 1.50528 0.92429 2.6499  
C 2.7987 0.54218 3.01222  
C 3.76419 0.24038 2.04328  
C 3.40034 0.33394 0.68921  
H 1.84776 0.77459 -0.73777  
H 0.76212 1.15138 3.40653  
H 3.05881 0.47745 4.06571  
H 4.13439 0.10411 -0.07923  
C 5.15579 -0.19546 2.4364  
H 5.28945 -1.27311 2.27572  
H 5.9179 0.31527 1.83722  
H 5.35598 0.0095 3.49239  
S -0.46561 1.57656 0.82782  
O -0.89153 0.62844 -0.31863  
O -1.33851 1.42324 2.01298  
O -0.32518 2.94526 0.28932

### TS-Va/VI.p-TsO

E(RB3LYP) = -1579.03548109  
Zero-point correction= 0.386175 (Hartree/Particle)  
Thermal correction to Energy= 0.412220  
Thermal correction to Enthalpy= 0.413164  
Thermal correction to Gibbs Free Energy= 0.324615  
Sum of electronic and zero-point Energies= -1578.649306  
Sum of electronic and thermal Energies= -1578.623261  
Sum of electronic and thermal Enthalpies= -1578.622317  
Sum of electronic and thermal Free Energies= -1578.710866  
E(RM062X) = -1578.96264713

C -0.46764 -5.24002 2.34511  
C 0.80842 -5.7469 2.57477  
C 1.86558 -4.87206 2.84082  
C 1.6453 -3.49031 2.87574  
C 0.3733 -2.97441 2.6465  
C -0.69743 -3.85154 2.38284  
H -1.29269 -5.91565 2.13781  
H 0.97817 -6.81866 2.54718  
H 2.86196 -5.26566 3.01951  
H 2.4693 -2.81313 3.07849  
H 0.21538 -1.90071 2.66829  
C -2.06338 -3.39782 2.159  
H -1.85392 -1.36441 2.49428  
N -2.49719 -2.18573 2.44246  
C -4.21174 -1.85771 0.70527  
O -5.25647 -1.27722 0.41167  
C -4.4842 -0.99199 3.00309  
H -4.00013 -0.00951 3.06435  
H -5.51237 -0.8687 2.67232  
H -4.46096 -1.47172 3.98388  
C -3.89696 -2.39659 -1.65221  
H -3.65997 -3.3104 -2.20436  
H -4.96463 -2.20061 -1.7187  
H -3.33925 -1.55679 -2.08537  
N -3.79528 -1.86063 2.04684  
N -3.53223 -2.59922 -0.24671  
N -2.21231 -3.06176 -0.02513  
H -1.54518 -2.30465 -0.22572  
H -2.04895 -3.86489 -0.63044  
C 1.61561 0.4614 -0.54229  
C 1.04574 0.68436 0.71318

## Supporting Information

C 1.85423 1.03078 1.79968  
C 3.23271 1.14609 1.624  
C 3.82714 0.92261 0.37247  
C 2.99614 0.58121 -0.70442  
H 0.98408 0.1871 -1.38079  
H 1.40829 1.19725 2.77479  
H 3.85743 1.41379 2.47277  
H 3.43484 0.4045 -1.68349  
C 5.3245 1.01935 0.19787  
H 5.80982 0.06148 0.4279  
H 5.59115 1.28031 -0.83131  
H 5.75745 1.77044 0.86674  
S -0.73893 0.60964 0.90955  
O -1.22515 -0.35992 -0.12055  
O -0.95222 0.09985 2.31688  
O -1.26061 1.98522 0.72325  
H -2.83316 -4.15171 2.04108

### TS-VI/IX

E(RB3LYP) = -684.094787739  
Zero-point correction= 0.254615 (Hartree/Particle)  
Thermal correction to Energy= 0.268580  
Thermal correction to Enthalpy= 0.269525  
Thermal correction to Gibbs Free Energy= 0.213187  
Sum of electronic and zero-point Energies= -683.840173  
Sum of electronic and thermal Energies= -683.826207  
Sum of electronic and thermal Enthalpies= -683.825263  
Sum of electronic and thermal Free Energies= -683.881601  
E(RM062X) = -684.019209276

C -0.4293 -5.19948 2.62741  
C 0.89047 -5.60754 2.79713  
C 1.9234 -4.66988 2.71369  
C 1.63971 -3.32249 2.45695  
C 0.32439 -2.90675 2.28791  
C -0.72436 -3.84429 2.38218  
H -1.23703 -5.92279 2.69073  
H 1.11335 -6.65157 2.99172  
H 2.95362 -4.98792 2.84247  
H 2.44644 -2.60045 2.38327  
H 0.1239 -1.86265 2.0676  
C -2.12369 -3.48233 2.24674  
H -1.96128 -1.45142 2.42522  
N -2.58818 -2.25486 2.43262  
C -4.10716 -1.70829 0.69259  
O -5.02665 -0.98482 0.33717  
C -4.73327 -1.33245 3.04865  
H -4.42498 -0.28865 3.1843  
H -5.76863 -1.35728 2.71197  
H -4.64007 -1.87263 3.99188  
C -3.38153 -1.93952 -1.62971  
H -4.14092 -2.58797 -2.08384  
H -3.68865 -0.89965 -1.73046  
H -2.42622 -2.08565 -2.14017  
N -3.91229 -2.02161 2.04947  
N -3.19271 -2.24232 -0.20783  
N -2.58153 -3.487 0.08862  
H -1.69706 -3.53741 -0.41683  
H -3.17291 -4.26567 -0.21798  
H -2.86901 -4.26292 2.32703

### TS for deprotonation of Vb to give VII

E(RB3LYP) = -1579.02904653  
Zero-point correction= 0.381161 (Hartree/Particle)  
Thermal correction to Energy= 0.407774  
Thermal correction to Enthalpy= 0.408719  
Thermal correction to Gibbs Free Energy= 0.318770  
Sum of electronic and zero-point Energies= -1578.647885  
Sum of electronic and thermal Energies= -1578.621272  
Sum of electronic and thermal Enthalpies= -1578.620328  
Sum of electronic and thermal Free Energies= -1578.710277  
E(RM062X) = -1578.96306489

C 0.0702 -3.1793 2.84113

## Supporting Information

C 1.40313 -3.53298 3.04045  
C 2.31269 -3.43621 1.9847  
C 1.88546 -2.98747 0.72881  
C 0.5563 -2.63163 0.52404  
C -0.36716 -2.7183 1.58496  
H -0.63964 -3.25467 3.66056  
H 1.73001 -3.88472 4.01424  
H 3.35191 -3.71352 2.13616  
H 2.59223 -2.91747 -0.09262  
H 0.2325 -2.29868 -0.45522  
C -1.77339 -2.35003 1.46283  
H -1.79017 -1.50417 -0.90093  
N -2.30994 -1.80137 0.42647  
C -4.63294 -2.53813 0.81632  
O -5.69787 -2.23719 1.35761  
C -4.03403 -0.15512 0.74082  
H -3.37699 0.46387 0.12633  
H -5.07343 0.01438 0.45998  
H -3.90024 0.11176 1.79805  
C -5.28931 -4.88382 0.809  
H -4.76182 -5.83809 0.89779  
H -5.77347 -4.64754 1.75652  
H -6.06063 -4.97433 0.03041  
N -3.70027 -1.55578 0.49107  
N -4.31501 -3.84604 0.48578  
N -3.48874 -4.06174 -0.64075  
H -4.0753 -4.36131 -1.42319  
H -2.85427 -4.83014 -0.42697  
C 0.97161 -0.20265 -4.07358  
C 0.51349 0.12147 -2.79469  
C 1.40866 0.45854 -1.77602  
C 2.77552 0.46601 -2.04842  
C 3.26442 0.14454 -3.32432  
C 2.34229 -0.18989 -4.32754  
H 0.26573 -0.45358 -4.85786  
H 1.04113 0.71886 -0.78911  
H 3.47345 0.72951 -1.25804  
H 2.70081 -0.44203 -5.3221  
C 4.74482 0.18708 -3.61755  
H 5.0144 -0.51133 -4.41599  
H 5.04812 1.19038 -3.94459  
H 5.33554 -0.05772 -2.72911  
S -1.2378 0.07513 -2.44734  
O -1.47675 -1.40916 -1.94731  
O -1.51815 1.01534 -1.34744  
O -1.95768 0.25225 -3.71564  
H -2.4062 -2.56651 2.32541
